# Supplementary material for: Highly efficient hydrogenative depolymerisation of polycaprolactone to 1,6-hexanediol
Source: Royal Society of Chemistry journal article supplement (doi:10.1039/d5su00729a), 2025-12-02
Supplement: d5su00729a1.pdf [file d5su00729a1.pdf]

Electronic Supporting Information for Manuscript:

## **Highly efficient Hydrogenative depolymerisation of Polycaprolactone to 1,6-hexanediol**

Garima Saini,<sup>a</sup> Alejandra Sophia Lozano Perez,<sup>a</sup> Niklas von-Wolff,<sup>b</sup> and Amit Kumar<sup>\*a</sup>

<sup>a</sup> EaStCHEM, School of Chemistry, University of St. Andrews, North Haugh, St. Andrews, KY16 9ST, UK.

<sup>b</sup> Sorbonne Université, CNRS, Institut Parisien de Chimie Moléculaire, IPCM, eMOCA, 4 Place Jussieu, 75005 Paris, France.

Email: [ak366@st-andrews.ac.uk](mailto:ak366@st-andrews.ac.uk)

## Table of Contents

|                                                                                 |    |
|---------------------------------------------------------------------------------|----|
| 1. General Considerations .....                                                 | 3  |
| 2. Procedure for hydrogenolysis of Polycaprolactone .....                       | 3  |
| 3. Method for the isolation of 1,6-hexanediol.....                              | 4  |
| 4. Characterisation of commercial polycaprolactone.....                         | 4  |
| 5. Characterisation of commercial ethyl 6-hydroxyhexanoate .....                | 6  |
| 6. Characterisation of commercial $\epsilon$ -caprolactone.....                 | 8  |
| 7. Characterisation of isolated product-1,6-hexanediol.....                     | 9  |
| 8. Optimisation of Catalytic Conditions .....                                   | 11 |
| 9. Optimisation of Catalytic Conditions under solvent minimised conditions..... | 34 |
| 10. Kinetic studies.....                                                        | 38 |
| 11. Reaction with $\epsilon$ -caprolactone .....                                | 43 |
| 12. Role of alcohols in transesterification reactions.....                      | 43 |
| 13. Role of temperature in transesterification and hydrogenation reactions..... | 45 |
| 14. Catalyst stability.....                                                     | 46 |
| 15. DFT Studies .....                                                           | 47 |
| 16. References .....                                                            | 53 |

## 1. General Considerations

All manipulations, unless otherwise stated, were performed under an argon atmosphere using standard Schlenk line and glove-box techniques. Hydrogen gas was supplied by BOC Gases. Glassware was oven-dried at 130 °C overnight and flamed under vacuum prior to use. THF and Toluene were dried using a Grubbs-type solvent purification system (Innovative Technologies SPS) equipped with a degasser. Polycaprolactone ( $M_n = 80,000$  Da), 2-methyltetrahydrofuran (anhydrous) and ethanol (anhydrous) were purchased from Sigma-Aldrich. Afterwards, the solvents were degassed by flushing them with argon through an argon lance equipped with a frit. The solvents were dried and stored in glass Schlenk flask over molecular sieves 3 Å or 4 Å. Ruthenium complex **1** was purchased from TCI and used as received. Manganese complexes **2** and **3** were synthesized following the procedure described in the literature.<sup>1</sup> Complex **4** was bought from Thermo Scientific and complexes **5**, **6**, **7**, and **8** were donated by Johnson Matthey.

KOtBu, KOH, and NaOtBu were purchased from Sigma-Aldrich, and TCI and stored at 80 °C and dried in oven before use. NMR solvents were purchased from Sigma-Aldrich and used as received.

NMR spectra were recorded on a Bruker AVII 500 MHz and Bruker Neo 400 MHz NMR spectrometer at 298 K unless otherwise specified. Residual proton solvent was used as reference for  $^1\text{H}$  spectra in deuterated solvent samples. All chemical shifts ( $\delta$ ) are quoted in ppm and coupling constants ( $J$ ) in Hz. GC-MS (Gas Chromatography-Mass Spectrometry) data was collected using Agilent 8860 GC system coupled to an Agilent 5977B EI instrument. Helium was used as carrier gas with a column flow of 1.87 mL/min. SH-RTx-1 (100% dimethyl polysiloxane, 30 m) was used as a column. Ion source temperature of 200 °C, and injection temperature of 330 °C were used. The oven temperature range was from 50 °C to 250 °C (start with 50 °C, hold for 4.2 minutes, followed by a temperature ramp of 10°C/minute for 15 minutes and stay at 250 °C until 39 minutes).

## 2. Procedure for hydrogenolysis of Polycaprolactone

### *General method for the hydrogenation of Polycaprolactone:*

Polycaprolactone (114 mg, 1 mmol relative to the monomer, 1eq.) and KOtBu {11.2 mg, 0.1 mmol, 10 mol%, 0.1 mL (1M solution in THF)} were weighed in an 8 mL glass vial with a stirrer and sealed with a crimp cap using a crimper. The vial was cycled with argon (3 times) with needle at the top and syringe connected to the Schlenk line, and 2-MeTHF (2 mL) and ethanol (0.25 mL) were added by syringe. A 2 mM stock solution of the catalyst was prepared by dissolving 0.01 mmol of precatalyst in 5 mL of 2 Me-THF in another vial under argon atmosphere. 0.25 mL (0.05 mol% of precatalyst) of the precatalytic solution was transferred to the reaction vial by syringe. The vial was placed into a 150 mL autoclave with metal beads to ensure thermal conductivity. The autoclave was purged with argon, sealed,

purged with H<sub>2</sub>, and pressurised with H<sub>2</sub> at 60 bar. It was then placed in a preheated oil bath at 80 °C and stirred for 20 h. After the completion of reaction, the autoclave was cooled to room temperature and H<sub>2</sub> gas was carefully vented to atmosphere. 1 mmol of internal standard (mesitylene) was added into the reaction mixture and the yield of the product was estimated by GC-MS quantitative analysis. The method for product isolation has been described in Section 3.

***Method for the hydrogenation of Polycaprolactone under solvent-minimised conditions:***

Polycaprolactone (114mg, 1mmol, 1eq.) and KOtBu {5.6 mg, 0.05 mmol, 5 mol%, 0.05 mL} were weighed in an 8mL glass vial with a stirrer and sealed with a crimp cap using a crimper. The vial was cycled with argon (3 times) with needle at the top and syringe connected to the Schlenk line, and 0.25 mL of Ethanol was added by syringe. A 2 or 5 mM stock solution of the catalyst was prepared by dissolving 0.01 mmol of precatalyst in 5 or 2 mL of 2 Me-THF (for precatalyst 8) or Ethanol (for precatalyst 7) in another vial under argon atmosphere. The required amount of precatalytic solution was transferred to the reaction vial by syringe. The vial was placed into a 150 mL autoclave with metal beads to ensure thermal conductivity. The autoclave was purged with argon, closed, purged with H<sub>2</sub> and pressurised with H<sub>2</sub> at 60 bar. It was then placed in a preheated oil bath at 80 °C and stirred for 20 h. After the completion of reaction, the autoclave was cooled to room temperature and H<sub>2</sub> gas was carefully vented to atmosphere. 1 mmol of internal standard (Mesitylene) was added into the reaction mixture and the yield of the product was estimated by GC-MS quantitative analysis.

**3. Method for the isolation of 1,6-hexanediol**

The reaction mixture (Table 2, entry 8) was cooled to room temperature. Ethanol (2-5 mL) was then added to the residue, followed by vacuum filtration to remove any starting material left as the desired product is soluble in ethanol whereas the starting material (polycaprolactone) is insoluble in ethanol. The solution containing the product was concentrated using a rotary evaporator to remove the ethanol. It was then extracted with toluene/water mixture to remove the catalyst. 1,6-hexanediol is soluble in water and the catalyst separated by dissolving in Toluene. The aqueous solution was concentrated using the rotary evaporator. Finally, the pure 1,6-hexanediol was dried under vacuum on a Schlenk line for at least 2 hours, yielding the final product in 91% yield.

**4. Characterisation of commercial polycaprolactone**

**<sup>1</sup>H NMR** (500 MHz, CD<sub>2</sub>Cl<sub>2</sub>): δH 4.07 (t, -O-CH<sub>2</sub>-CH<sub>2</sub>-CH<sub>2</sub>-CH<sub>2</sub>-CH<sub>2</sub>-CO-), 2.32 (t, -O-CH<sub>2</sub>-CH<sub>2</sub>-CH<sub>2</sub>-CH<sub>2</sub>-CH<sub>2</sub>-CO-), 1.66-1.63 (m, -O-CH<sub>2</sub>-CH<sub>2</sub>-CH<sub>2</sub>-CH<sub>2</sub>-CH<sub>2</sub>-CO-), 1.41 (m, -O-CH<sub>2</sub>-CH<sub>2</sub>-CH<sub>2</sub>-CH<sub>2</sub>-CH<sub>2</sub>-CO-).

**<sup>13</sup>C{<sup>1</sup>H} NMR** (126 MHz, CD<sub>2</sub>Cl<sub>2</sub>): δC 173.34 (-O-CH<sub>2</sub>-CH<sub>2</sub>-CH<sub>2</sub>-CH<sub>2</sub>-CH<sub>2</sub>-CO-), 64.02 (-O-CH<sub>2</sub>-CH<sub>2</sub>-CH<sub>2</sub>-CH<sub>2</sub>-CH<sub>2</sub>-CO-), 34.03 (-O-CH<sub>2</sub>-CH<sub>2</sub>-CH<sub>2</sub>-CH<sub>2</sub>-CH<sub>2</sub>-CO-), 28.35, 25.49, 24.58 (-O-CH<sub>2</sub>-CH<sub>2</sub>-CH<sub>2</sub>-CH<sub>2</sub>-CH<sub>2</sub>-CO-).

The NMR data matches well with the literature.<sup>2</sup>



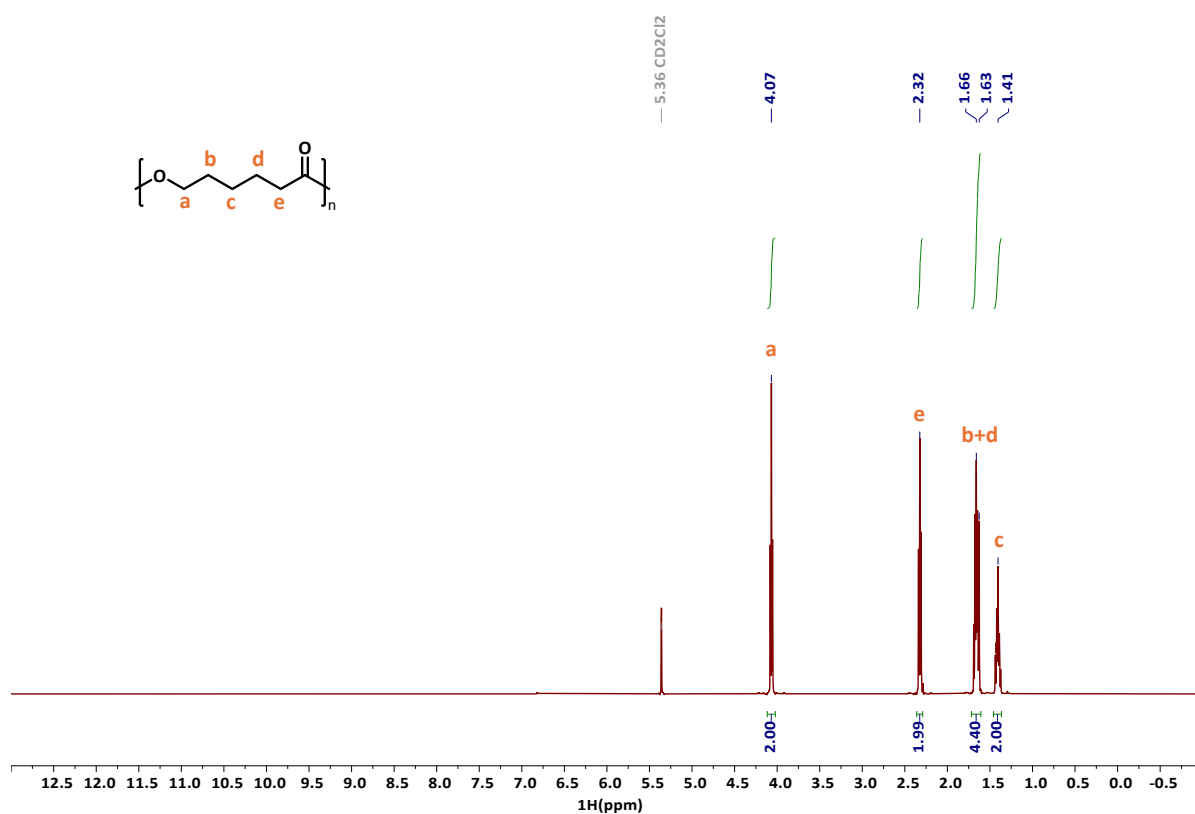

**Figure S1.** <sup>1</sup>H NMR (500 MHz, CD<sub>2</sub>Cl<sub>2</sub>) spectrum of polycaprolactone.

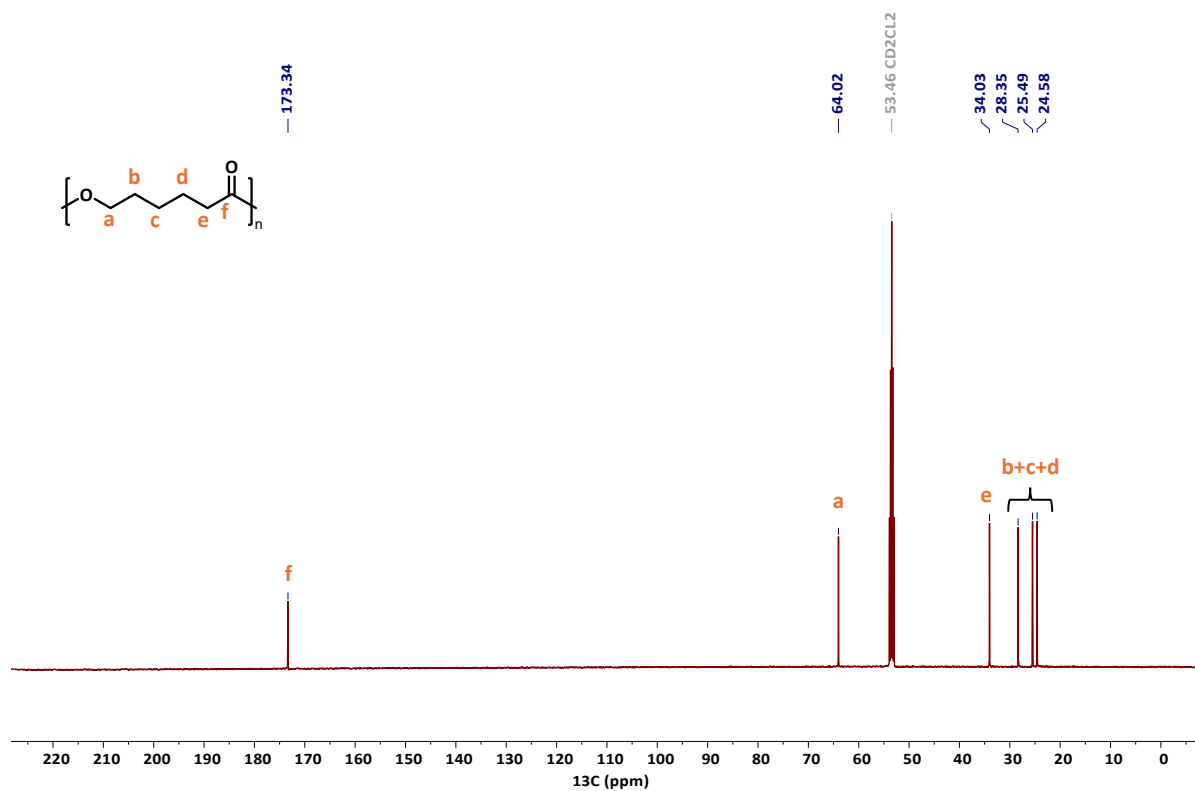

**Figure S2.**  $^{13}\text{C}\{^1\text{H}\}$  NMR (126 MHz,  $\text{CD}_2\text{Cl}_2$ ) spectrum of polycaprolactone.

## 5. Characterisation of commercial ethyl 6-hydroxyhexanoate

$^1\text{H}$  NMR (500 MHz,  $\text{CD}_3\text{OD}$ ):  $\delta$  H 4.13 (q, HO-CH<sub>2</sub>-CH<sub>2</sub>-CH<sub>2</sub>-CH<sub>2</sub>-CH<sub>2</sub>-CO-O- **CH<sub>2</sub>**-CH<sub>3</sub>), 3.57 (t, HO-**CH<sub>2</sub>**-CH<sub>2</sub>-CH<sub>2</sub>-CH<sub>2</sub>-CH<sub>2</sub>-CO-O-CH<sub>2</sub>-CH<sub>3</sub>), 2.34 (t, HO-CH<sub>2</sub>-CH<sub>2</sub>-CH<sub>2</sub>-CH<sub>2</sub>-**CH<sub>2</sub>**-CO-O-CH<sub>2</sub>-CH<sub>3</sub>), 1.65 (m, HO-CH<sub>2</sub>-CH<sub>2</sub>-CH<sub>2</sub>-CH<sub>2</sub>-**CH<sub>2</sub>**-CH<sub>2</sub>-CO-O-CH<sub>2</sub>-CH<sub>3</sub>), 1.57 (m, HO-CH<sub>2</sub>-**CH<sub>2</sub>**-CH<sub>2</sub>-CH<sub>2</sub>-CH<sub>2</sub>-CO-O-CH<sub>2</sub>-CH<sub>3</sub>), 1.41 (m, HO-CH<sub>2</sub>-CH<sub>2</sub>-**CH<sub>2</sub>**-CH<sub>2</sub>-CH<sub>2</sub>-CO-O-CH<sub>2</sub>-CH<sub>3</sub>), 1.26 (t, HO-CH<sub>2</sub>-CH<sub>2</sub>-CH<sub>2</sub>-CH<sub>2</sub>-CH<sub>2</sub>-CO-O-CH<sub>2</sub>-**CH<sub>3</sub>**).

$^{13}\text{C}\{^1\text{H}\}$  NMR (126 MHz,  $\text{CD}_3\text{OD}$ ):  $\delta$  C 173.86 (HO-CH<sub>2</sub>-CH<sub>2</sub>-CH<sub>2</sub>-CH<sub>2</sub>-CH<sub>2</sub>-**CO**-O-CH<sub>2</sub>-CH<sub>3</sub>), 61.34 (HO-**CH<sub>2</sub>**-CH<sub>2</sub>-CH<sub>2</sub>-CH<sub>2</sub>-CH<sub>2</sub>-CO-O-CH<sub>2</sub>-CH<sub>3</sub>), 59.99 (HO-CH<sub>2</sub>-CH<sub>2</sub>-CH<sub>2</sub>-CH<sub>2</sub>-CH<sub>2</sub>-CO-O- **CH<sub>2</sub>**-CH<sub>3</sub>), 33.70 (HO-CH<sub>2</sub>-CH<sub>2</sub>-CH<sub>2</sub>-CH<sub>2</sub>-**CH<sub>2</sub>**-CO-O-CH<sub>2</sub>-CH<sub>3</sub>), 31.92 (HO-CH<sub>2</sub>-**CH<sub>2</sub>**-CH<sub>2</sub>-CH<sub>2</sub>-CH<sub>2</sub>-CO-O-CH<sub>2</sub>-CH<sub>3</sub>), 25.10, 24.52 (HO-CH<sub>2</sub>-CH<sub>2</sub>-**CH<sub>2</sub>**-CH<sub>2</sub>-CH<sub>2</sub>-CO-O-CH<sub>2</sub>-CH<sub>3</sub>), 13.22 (HO-CH<sub>2</sub>-CH<sub>2</sub>-CH<sub>2</sub>-CH<sub>2</sub>-CH<sub>2</sub>-CO-O-CH<sub>2</sub>-**CH<sub>3</sub>**).

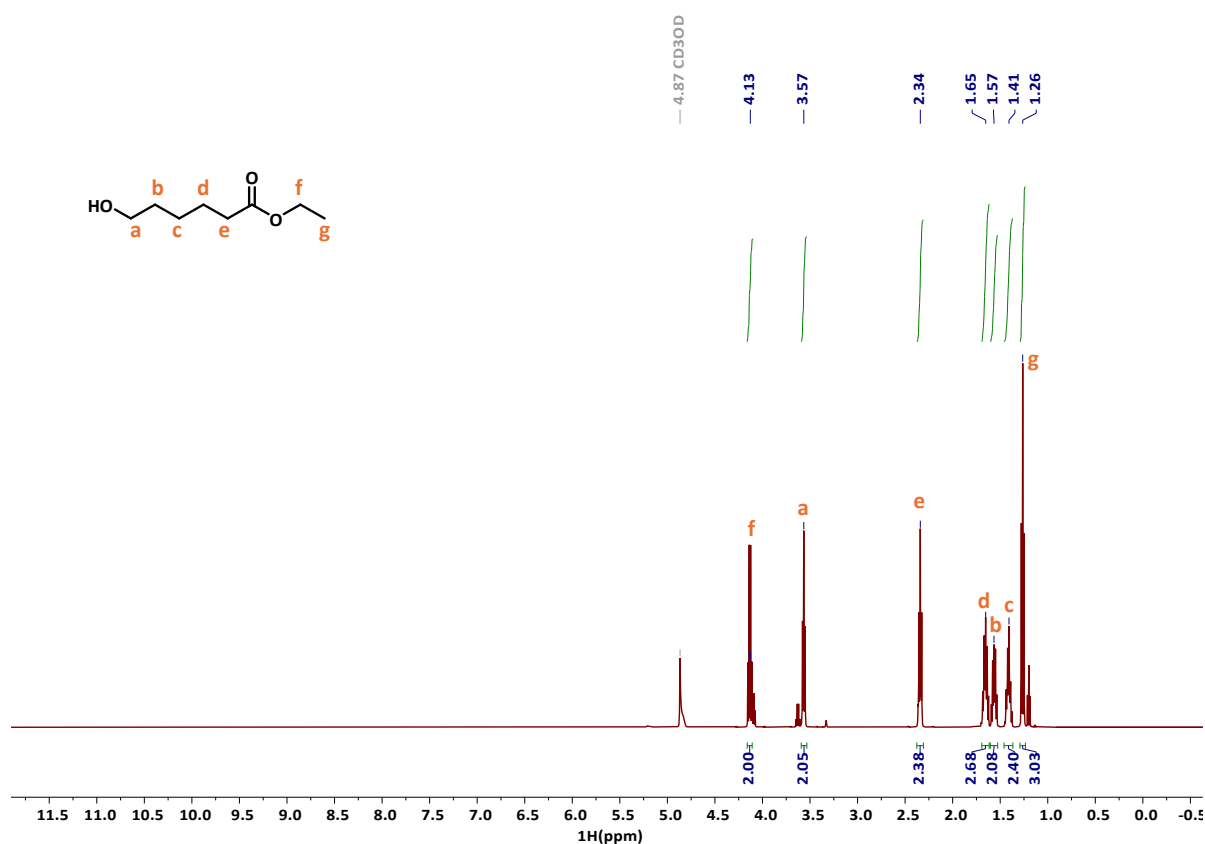

**Figure S3.**  $^1\text{H}$  NMR (500 MHz,  $\text{CD}_3\text{OD}$ ) spectrum of ethyl 6-hydroxyhexanoate.

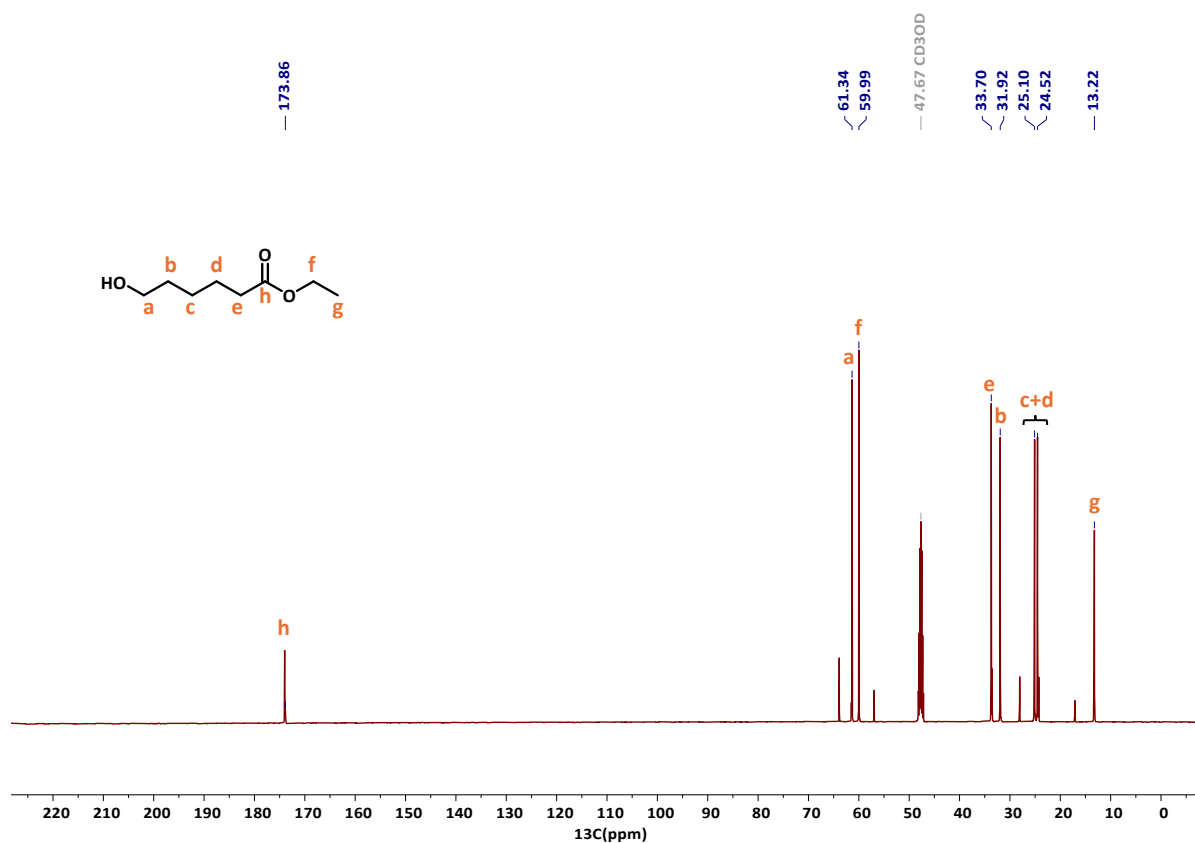

Figure S4. <sup>13</sup>C{<sup>1</sup>H} NMR (126 MHz, CD<sub>3</sub>OD) spectrum of ethyl 6-hydroxyhexanoate.

#### Sample Chromatograms

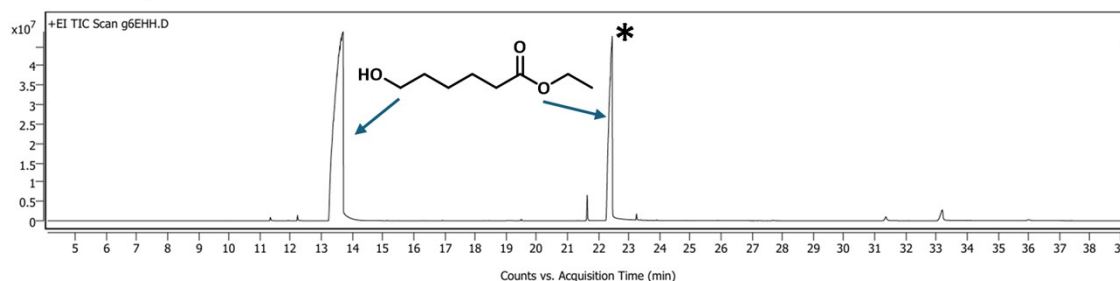

#### Sample Spectra

##### + Scan (rt: 13.122-13.906 min)

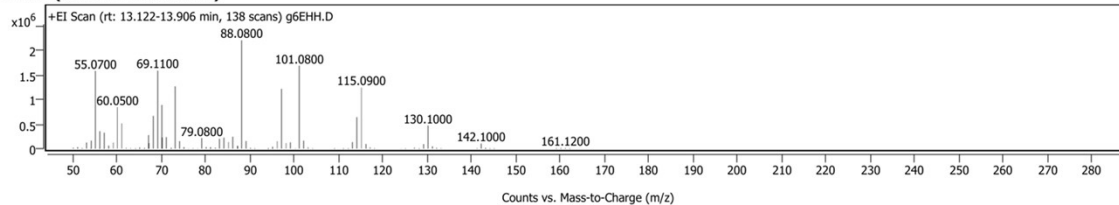

##### + Scan (rt: 22.209-22.655 min)

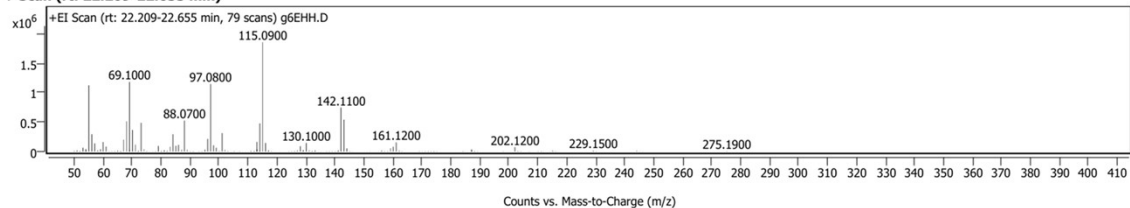

Figure S5. GC-MS data of Ethyl 6-hydroxyhexanoate.

\* We speculate that the peak at 22.4 min could be due to the dimer formed during the GC-MS analysis due to high temperatures.

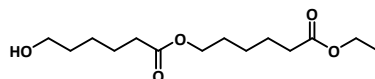

## 6. Characterisation of commercial $\epsilon$ -caprolactone

$^1\text{H}$  NMR (500 MHz,  $\text{CD}_3\text{OD}$ ):  $\delta$  4.31 (t, -O-**CH**<sub>2</sub>-CH<sub>2</sub>-CH<sub>2</sub>-CH<sub>2</sub>-CH<sub>2</sub>-CO-), 2.69 (t, -O-CH<sub>2</sub>-CH<sub>2</sub>-CH<sub>2</sub>-CH<sub>2</sub>-**CH**<sub>2</sub>-CO-), 1.86-1.81 (m, -O-CH<sub>2</sub>-**CH**<sub>2</sub>-CH<sub>2</sub>-**CH**<sub>2</sub>-CH<sub>2</sub>-CO-), 1.74 (m, -O-CH<sub>2</sub>-CH<sub>2</sub>-**CH**<sub>2</sub>-CH<sub>2</sub>-CH<sub>2</sub>-CO-).

$^{13}\text{C}\{^1\text{H}\}$  NMR (126 MHz,  $\text{CD}_3\text{OD}$ ):  $\delta$  177.85 (-O-CH<sub>2</sub>-CH<sub>2</sub>-CH<sub>2</sub>-CH<sub>2</sub>-CH<sub>2</sub>-**C**O-), 69.14 (-O-**CH**<sub>2</sub>-CH<sub>2</sub>-CH<sub>2</sub>-CH<sub>2</sub>-CH<sub>2</sub>-CO-), 33.94 (-O-CH<sub>2</sub>-CH<sub>2</sub>-CH<sub>2</sub>-CH<sub>2</sub>-**CH**<sub>2</sub>-CO-), 29.13, 28.43 (-O-CH<sub>2</sub>-**CH**<sub>2</sub>-**CH**<sub>2</sub>-CH<sub>2</sub>-CH<sub>2</sub>-CO-), 22.70 (-O-CH<sub>2</sub>-CH<sub>2</sub>-CH<sub>2</sub>-**CH**<sub>2</sub>-CH<sub>2</sub>-CO-).

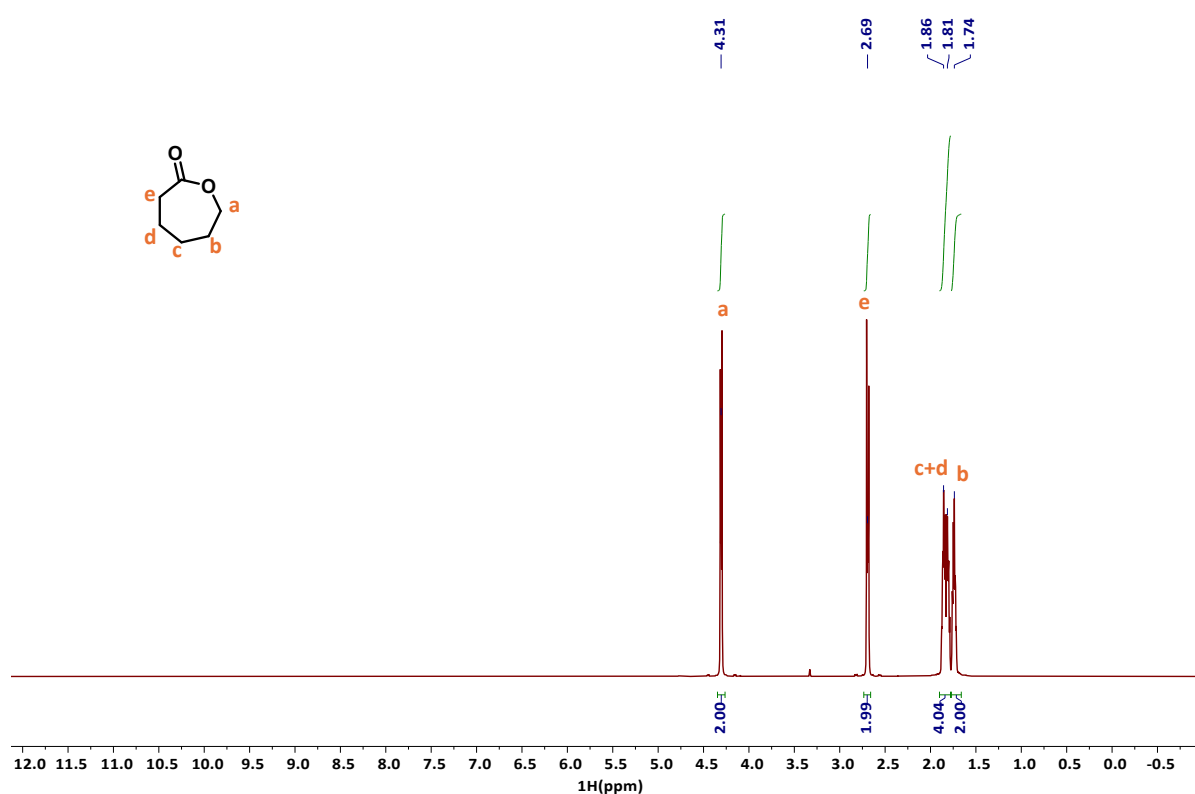

**Figure S6.**  $^1\text{H}$  NMR (500 MHz,  $\text{CD}_3\text{OD}$ ) spectrum of  $\epsilon$ -caprolactone.

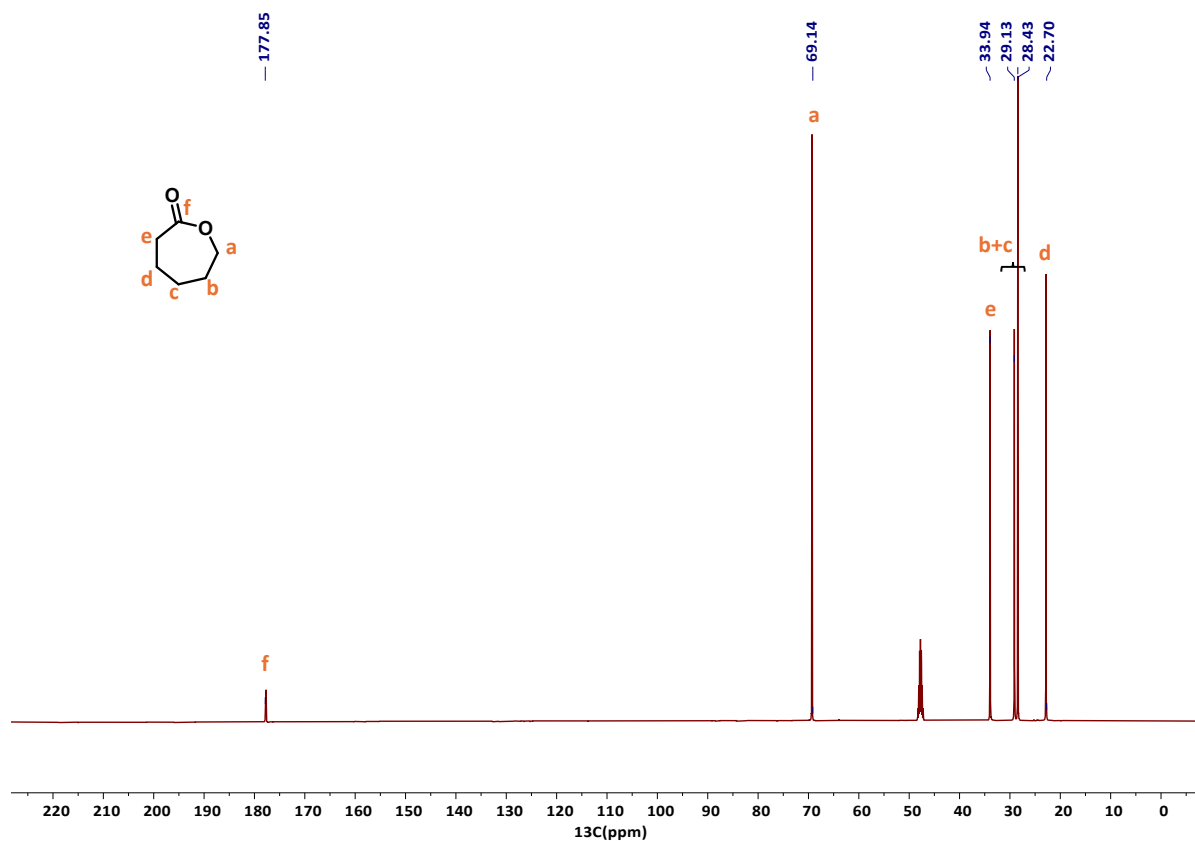

**Figure S7.**  $^{13}\text{C}\{^1\text{H}\}$  NMR (126 MHz,  $\text{CD}_3\text{OD}$ ) spectrum of  $\epsilon$ -caprolactone.

#### Sample Chromatograms

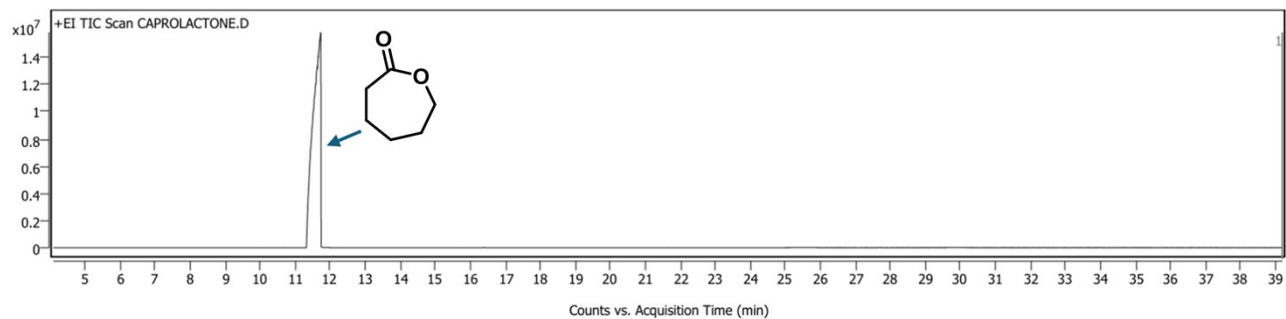

#### Sample Spectra

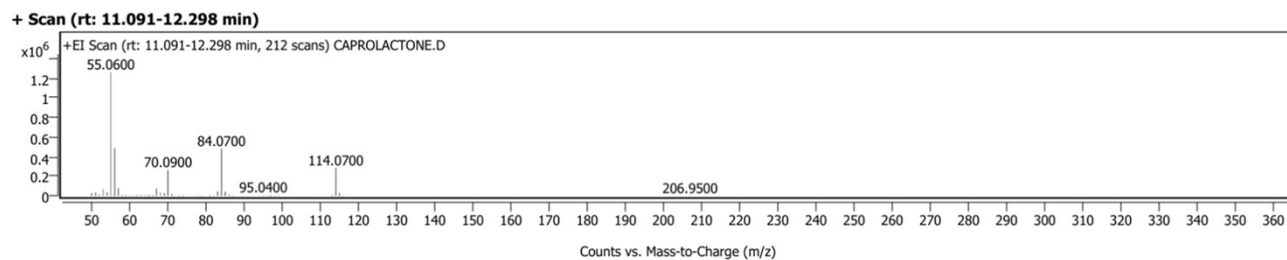

**Figure S8.** GC-MS data of  $\epsilon$ -caprolactone.

### 7. Characterisation of isolated product-1,6-hexanediol

The following data were obtained for the product isolated from the reaction conducted as per the conditions described in Table S2, entry 8.

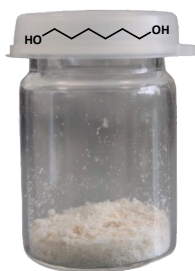

Yield of the 1,6-HD= 91%

$^1\text{H}$  NMR (500 MHz,  $\text{CD}_3\text{OD}$ ):  $\delta$  3.57 (t, HO-**CH**<sub>2</sub>-CH<sub>2</sub>-CH<sub>2</sub>-CH<sub>2</sub>-CH<sub>2</sub>-**CH**<sub>2</sub>-OH), 1.57 (t, HO-CH<sub>2</sub>-**CH**<sub>2</sub>-CH<sub>2</sub>-CH<sub>2</sub>-**CH**<sub>2</sub>-CH<sub>2</sub>-OH), 1.40 (t, HO-CH<sub>2</sub>-CH<sub>2</sub>-**CH**<sub>2</sub>-**CH**<sub>2</sub>-CH<sub>2</sub>-CH<sub>2</sub>-OH).

$^{13}\text{C}\{^1\text{H}\}$  NMR (126 MHz,  $\text{CD}_3\text{OD}$ ):  $\delta$  61.51 (HO-**CH**<sub>2</sub>-CH<sub>2</sub>-CH<sub>2</sub>-CH<sub>2</sub>-CH<sub>2</sub>-**CH**<sub>2</sub>-OH), 32.24 (HO-CH<sub>2</sub>-**CH**<sub>2</sub>-CH<sub>2</sub>-CH<sub>2</sub>-**CH**<sub>2</sub>-CH<sub>2</sub>-OH), 25.37 (HO-CH<sub>2</sub>-CH<sub>2</sub>-**CH**<sub>2</sub>-**CH**<sub>2</sub>-CH<sub>2</sub>-CH<sub>2</sub>-OH).

The NMR data matches well with the literature.<sup>2</sup>

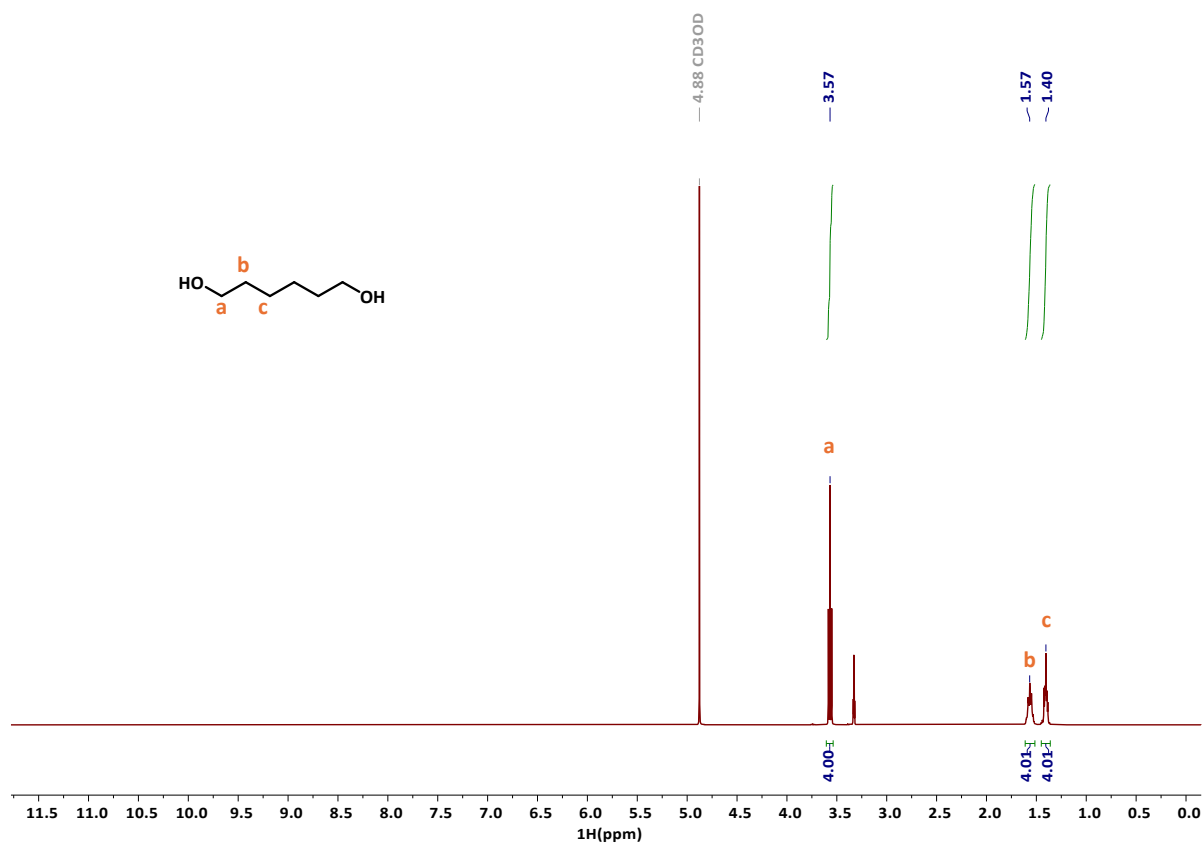

**Figure S9.**  $^1\text{H}$  NMR (500 MHz,  $\text{CD}_3\text{OD}$ ) spectrum of 1,6-hexanediol.

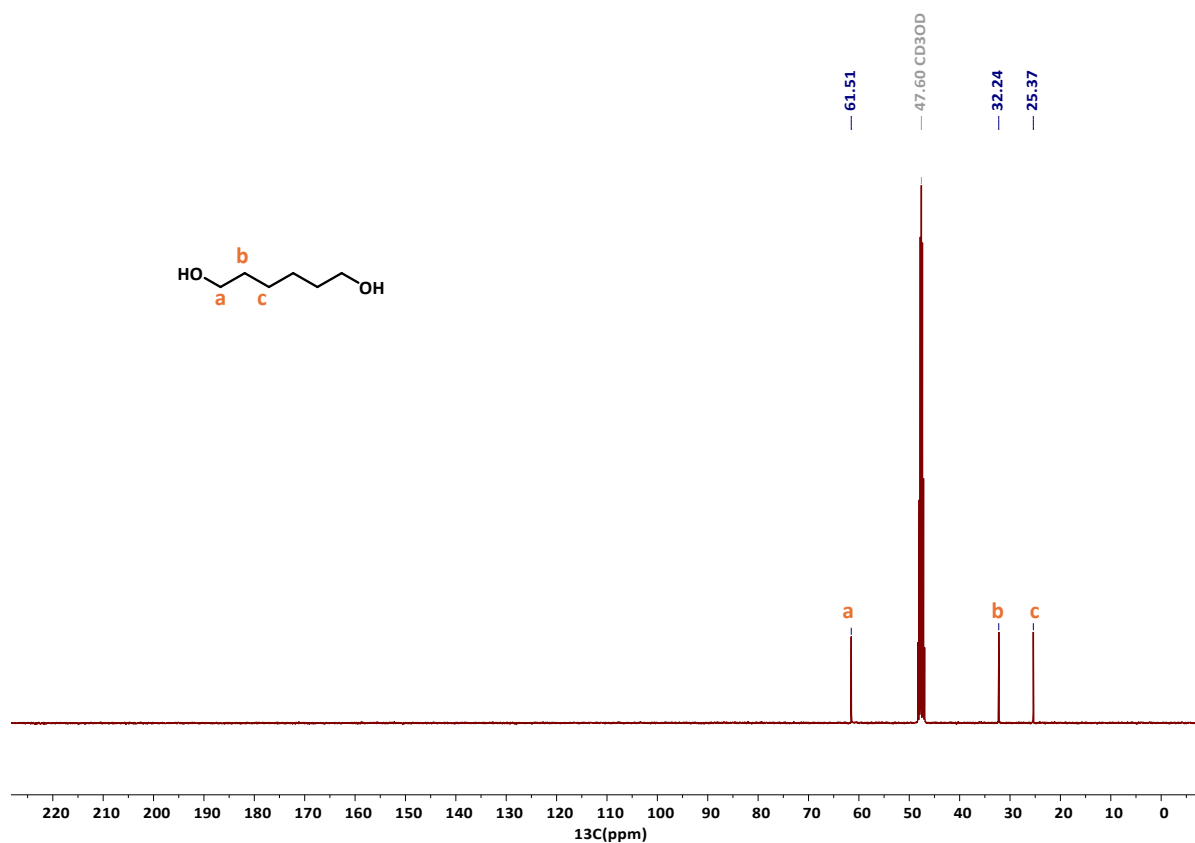

**Figure S10.**  $^{13}\text{C}\{^1\text{H}\}$  NMR (126 MHz,  $\text{CD}_3\text{OD}$ ) spectrum of 1,6-hexanediol.

#### Sample Chromatograms

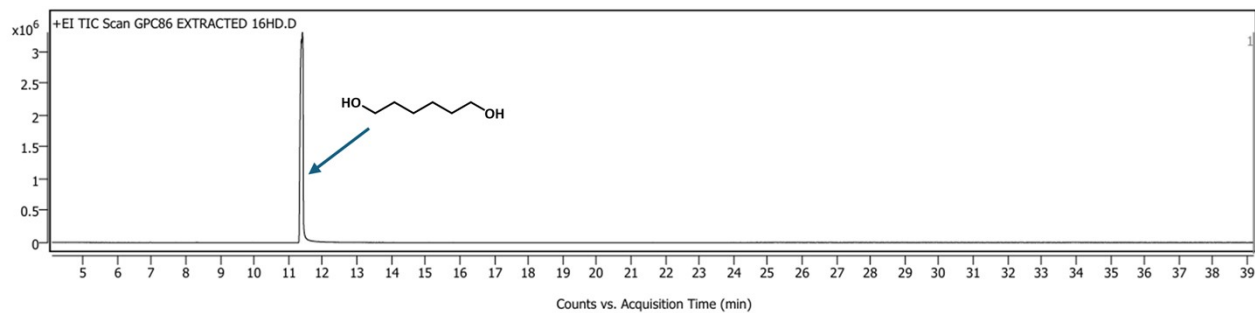

#### Sample Spectra

##### + Scan (rt: 11.205-11.795 min)

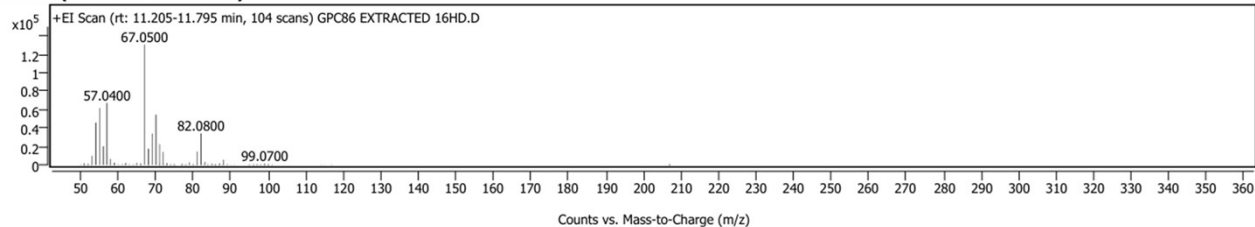

**Figure S11.** GC-MS data of 1,6-hexanediol.

## 8. Optimisation of Catalytic Conditions

**Table S1.** Optimisation of catalytic conditions for the hydrogenolysis of Polycaprolactone

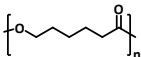

precatal, KOtBu, H<sub>2</sub> (60 bar)  
2-MeTHF/EtOH, 80 °C

→



+



+



| PCL, M <sub>n</sub> 80,000 |             |                            |        | 1,6-HD              |               |           |         | E6HH            |          | ε-CPL     | TON <sup>b</sup> |
|----------------------------|-------------|----------------------------|--------|---------------------|---------------|-----------|---------|-----------------|----------|-----------|------------------|
| Entry                      | Precatalyst | Precatalyst loading (mol%) | Base   | Base loading (mol%) | 2 Me THF (mL) | EtOH (mL) | Time, h | 1,6-HD (%)      | E6HH (%) | ε-CPL (%) |                  |
| 1                          | 1           | 0.05                       | KOtBu  | 10                  | 1             | 0.1       | 20      | 54              | 10       | 0         |                  |
| 2                          | 2           | 0.05                       | KOtBu  | 10                  | 1             | 0.1       | 20      | 0               | 39       | 1         | 0                |
| 3                          | 3           | 0.05                       | KOtBu  | 10                  | 1             | 0.1       | 20      | 0               | 44       | 1         | 0                |
| 4                          | 4           | 0.05                       | KOtBu  | 10                  | 1             | 0.1       | 20      | 0               | 51       | 0         | 0                |
| 5                          | 5           | 0.05                       | KOtBu  | 10                  | 1             | 0.1       | 20      | 42              | 17       | 0         | 840              |
| 6                          | 6           | 0.05                       | KOtBu  | 10                  | 1             | 0.1       | 20      | 17              | 29       | 1         | 340              |
| 7                          | 7           | 0.05                       | KOtBu  | 10                  | 1             | 0.1       | 20      | 87              | 0        | 0         | 1,740            |
| 8                          | 8           | 0.05                       | KOtBu  | 10                  | 1             | 0.1       | 20      | 84              | 0        | 0         | 1,680            |
| 9                          | 7           | 0.05                       | KOtBu  | 10                  | 2             | 0.25      | 20      | 93              | 0        | 0         | 1,860            |
| 10                         | 8           | 0.05                       | KOtBu  | 10                  | 2             | 0.25      | 20      | >99             | 0        | 0         | 2,000            |
| 11                         | 8           | 0.02                       | KOtBu  | 10                  | 2             | 0.25      | 20      | 36              | 40       | 2         | 1,800            |
| 12                         | 8           | 0.01                       | KOtBu  | 10                  | 2             | 0.25      | 20      | 34              | 40       | 2         | 3,400            |
| 13                         | -           | -                          | KOtBu  | 10                  | 2             | 0.25      | 20      | 0               | 48       | 10        | 0                |
| 14 <sup>c</sup>            | 8           | 0.05                       | KOtBu  | 10                  | 2             | 0.25      | 20      | 88              | 0        | 0         | 1,760            |
| 15                         | 8           | 0.05                       | KOtBu  | -                   | 2             | 0.25      | 20      | 0               | 0        | 0         | 0                |
| 16                         | 8           | 0.05                       | KOtBu  | 2                   | 2             | 0.25      | 20      | 12              | 52       | 1         | 240              |
| 17                         | 8           | 0.05                       | KOtBu  | 5                   | 2             | 0.25      | 20      | >99             | 0        | 0         | 2,000            |
| 18                         | 8           | 0.05                       | KOH    | 5                   | 2             | 0.25      | 20      | 93              | 0        | 0         | 1,860            |
| 19                         | 8           | 0.05                       | NaOtBu | 5                   | 2             | 0.25      | 20      | 96              | 0        | 0         | 1,920            |
| 20 <sup>d</sup>            | 8           | 0.05                       | KOtBu  | 5                   | 2             | 0.25      | 20      | 25              | 39       | 1         | 500              |
| 21 <sup>e</sup>            | 8           | 0.05                       | KOtBu  | 5                   | 2             | 0.25      | 20      | 87              | 0        | 0         | 1,740            |
| 22 <sup>f</sup>            | 8           | 0.05                       | KOtBu  | 5                   | 2             | 0.25      | 20      | 0               | 50       | 8         | 0                |
| 23 <sup>g</sup>            | 8           | 0.05                       | KOtBu  | 5                   | 2             | 0.25      | 20      | 84              | 0        | 0         | 1,680            |
| 24                         | 8           | 0.05                       | KOtBu  | 5                   | 2             | -         | 20      | 13 <sup>h</sup> | 0        | 0         | 260              |
| 25                         | 8           | 0.05                       | KOtBu  | 5                   | 2             | 0.1       | 20      | 87              | 0        | 0         | 1,740            |
| 26                         | 8           | 0.01                       | KOtBu  | 5                   | 2             | 0.25      | 72      | 92              | 0        | 0         | 9,200            |
| 27                         | 8           | 0.005                      | KOtBu  | 5                   | 2             | 0.25      | 72      | 79              | 6        | 0         | 15,800           |



1



2



3



4



5



6



7



8

<sup>a</sup>Polycaprolactone, Mn 80,000 (1 mmol of monomeric unit), 2-Me THF, EtOH, KOtBu (1M solution in THF), precatalyst (2 mM solution in 2-Me THF), 80 °C, 60 bar H<sub>2</sub>. Yields were estimated by quantitative GC-MS analysis using mesitylene as an internal standard. <sup>b</sup>TON estimated based on the number of ester groups hydrogenated. <sup>c</sup> Reaction done at 60 °C, <sup>d</sup> THF used as solvent. <sup>e</sup> Toluene used as solvent. <sup>f</sup> No external hydrogen pressure. <sup>g</sup> 30 bar H<sub>2</sub> pressure. <sup>h</sup> <sup>1</sup>H NMR yield.

#### Table S1; Entry 1:

<sup>1</sup>H NMR (500 MHz, CD<sub>3</sub>OD): δH 4.07 (t, -O-CH<sub>2</sub>-CH<sub>2</sub>-CH<sub>2</sub>-CH<sub>2</sub>-CO-), 2.32 (t, -O-CH<sub>2</sub>-CH<sub>2</sub>-CH<sub>2</sub>-CH<sub>2</sub>-CH<sub>2</sub>-CO-), 1.66-1.63 (m, -O-CH<sub>2</sub>-CH<sub>2</sub>-CH<sub>2</sub>-CH<sub>2</sub>-CH<sub>2</sub>-CO-), 1.41 (m, -O-CH<sub>2</sub>-CH<sub>2</sub>-CH<sub>2</sub>-CH<sub>2</sub>-CH<sub>2</sub>-CO-), 4.13 (q, HO-CH<sub>2</sub>-CH<sub>2</sub>-CH<sub>2</sub>-CH<sub>2</sub>-CH<sub>2</sub>-CO-O-CH<sub>2</sub>-CH<sub>3</sub>), 3.57 (t, HO-CH<sub>2</sub>-CH<sub>2</sub>-CH<sub>2</sub>-CH<sub>2</sub>-CH<sub>2</sub>-CO-O-CH<sub>2</sub>-CH<sub>3</sub>), 2.34 (t, HO-CH<sub>2</sub>-CH<sub>2</sub>-CH<sub>2</sub>-CH<sub>2</sub>-CH<sub>2</sub>-CO-O-CH<sub>2</sub>-CH<sub>3</sub>), 1.65 (m, HO-CH<sub>2</sub>-CH<sub>2</sub>-CH<sub>2</sub>-CH<sub>2</sub>-CH<sub>2</sub>-CO-O-CH<sub>2</sub>-CH<sub>3</sub>), 1.57 (m, HO-CH<sub>2</sub>-CH<sub>2</sub>-CH<sub>2</sub>-CH<sub>2</sub>-CH<sub>2</sub>-CO-O-CH<sub>2</sub>-CH<sub>3</sub>), 1.41 (m, HO-CH<sub>2</sub>-CH<sub>2</sub>-CH<sub>2</sub>-CH<sub>2</sub>-CH<sub>2</sub>-CO-O-CH<sub>2</sub>-CH<sub>3</sub>), 1.26 (t, HO-CH<sub>2</sub>-CH<sub>2</sub>-CH<sub>2</sub>-CH<sub>2</sub>-CH<sub>2</sub>-CO-O-CH<sub>2</sub>-CH<sub>3</sub>), 3.57 (t, HO-CH<sub>2</sub>-CH<sub>2</sub>-CH<sub>2</sub>-CH<sub>2</sub>-CH<sub>2</sub>-CH<sub>2</sub>-OH), 1.57 (t, HO-CH<sub>2</sub>-CH<sub>2</sub>-CH<sub>2</sub>-CH<sub>2</sub>-CH<sub>2</sub>-CH<sub>2</sub>-OH), 1.40 (t, HO-CH<sub>2</sub>-CH<sub>2</sub>-CH<sub>2</sub>-CH<sub>2</sub>-CH<sub>2</sub>-CH<sub>2</sub>-OH).



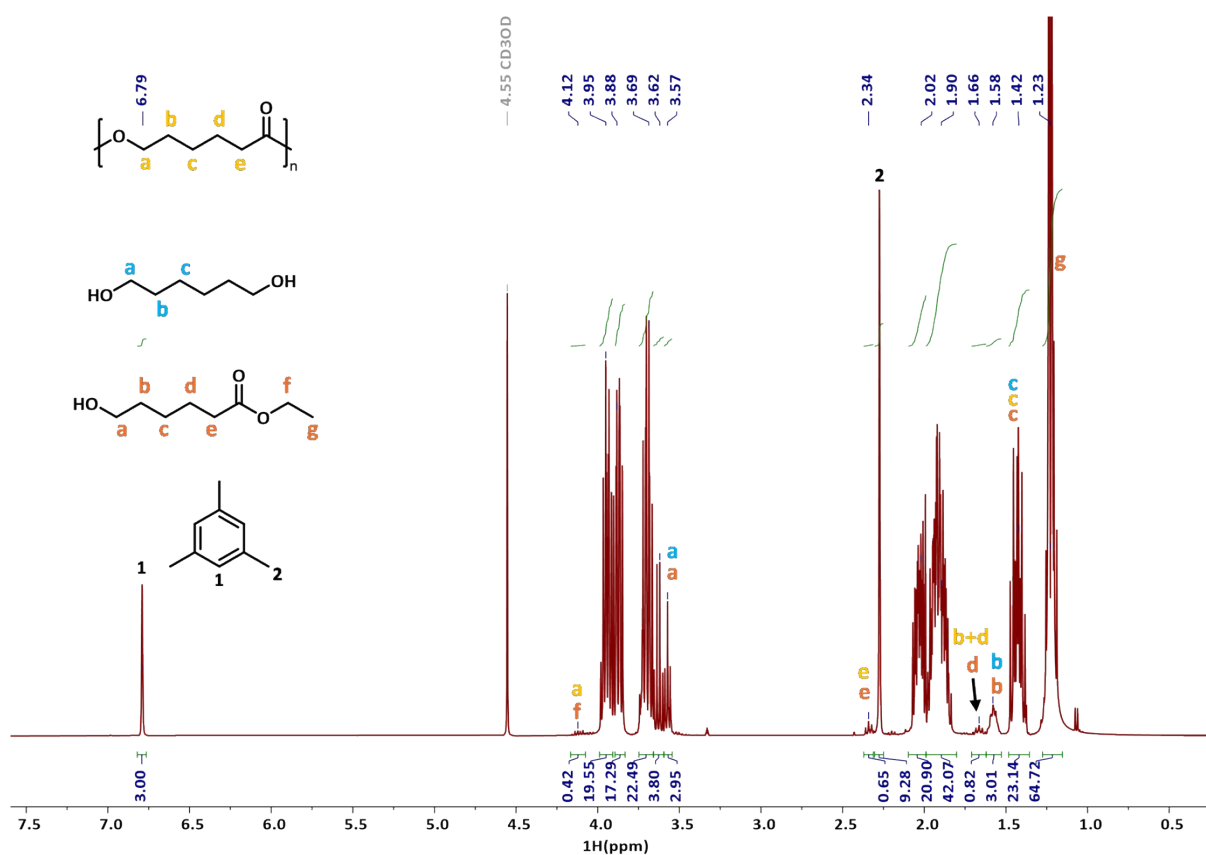

**Figure S12.** <sup>1</sup>H NMR (400 MHz, CD<sub>3</sub>OD) spectrum of the reaction mixture resulting from the reaction corresponding to Table S1; Entry 1. Mesitylene is used as an internal standard.

# Sample Chromatograms

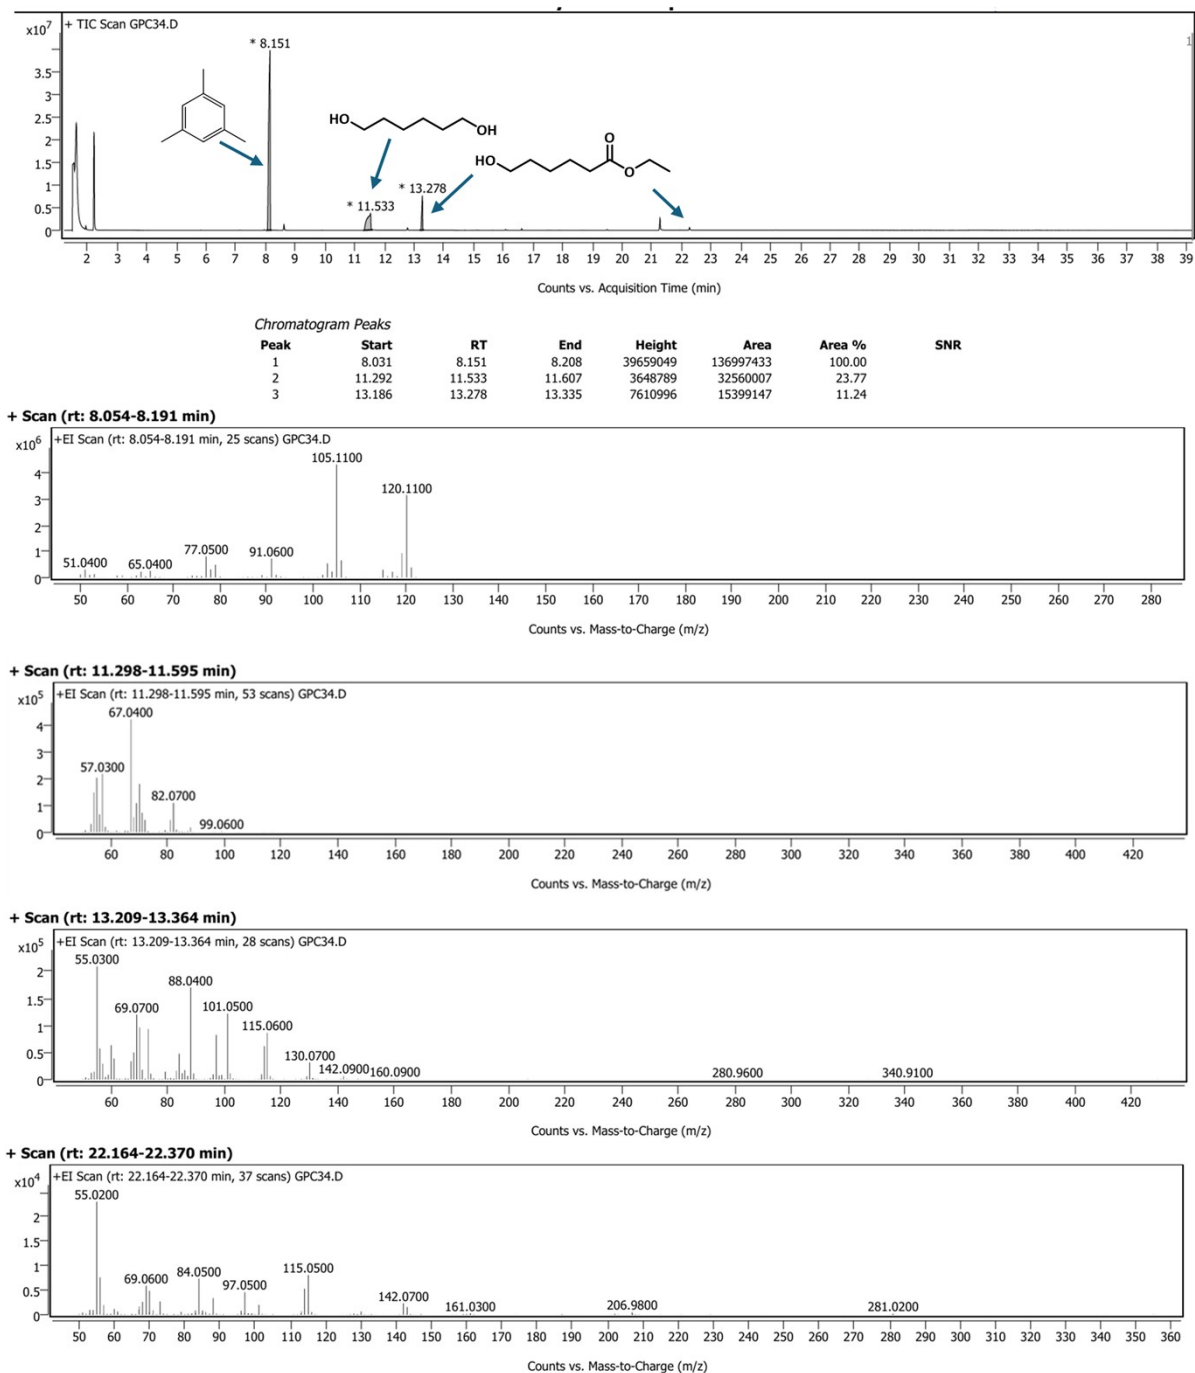

**Figure S13.** GC-MS data of the reaction mixture resulting from the reaction corresponding to Table S1; Entry 1.

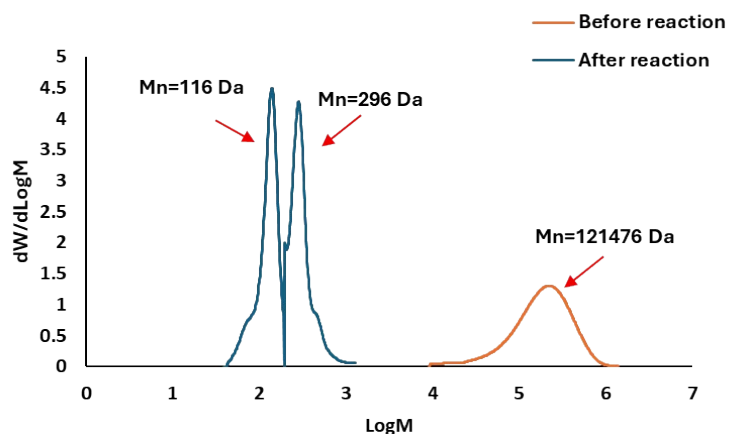

**Figure S14.** GPC data of the reaction mixture resulting from the reaction corresponding to Table S1; Entry 1.

**Table S1; Entry 2:**

#### Sample Chromatograms

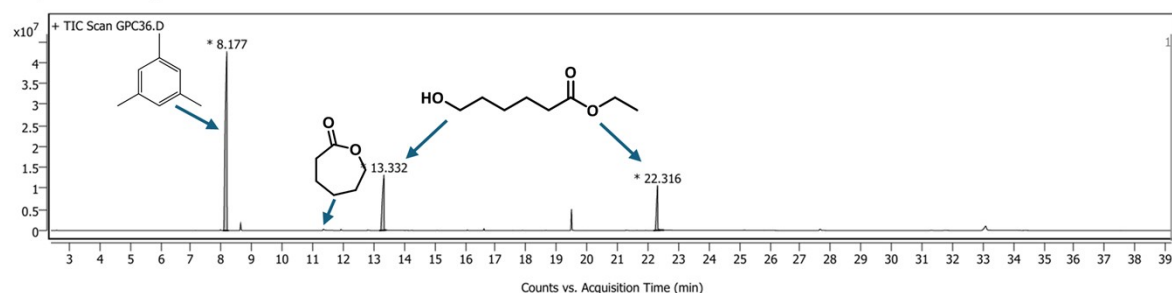

#### Chromatogram Peaks

| Peak | Start  | RT     | End    | Height   | Area      | Area % | SNR |
|------|--------|--------|--------|----------|-----------|--------|-----|
| 1    | 8.051  | 8.177  | 8.228  | 42682037 | 175739061 | 100.00 |     |
| 2    | 13.184 | 13.332 | 13.418 | 13211548 | 52025308  | 29.60  |     |
| 3    | 22.184 | 22.316 | 22.533 | 10744000 | 31023317  | 17.65  |     |

#### Sample Spectra

##### + Scan (rt: 11.313-11.404 min)

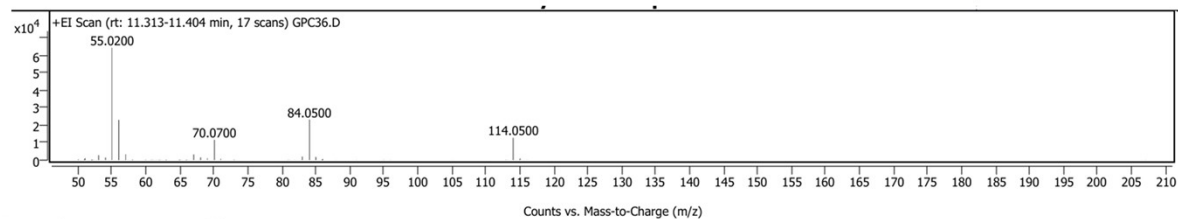

##### + Scan (rt: 13.189-13.424 min)

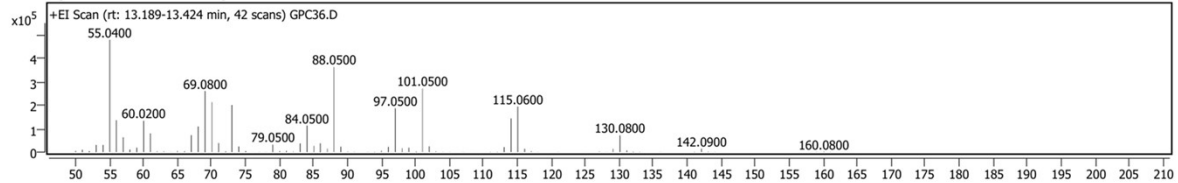

##### + Scan (rt: 22.184-22.396 min)

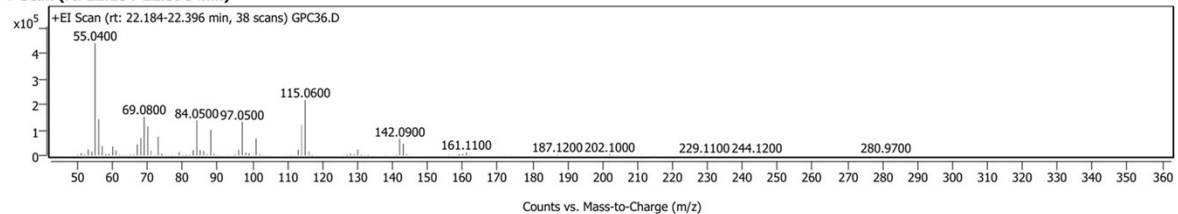

**Figure S15.** GC-MS data of the reaction mixture resulting from the reaction corresponding to Table S1; Entry 2.

Table S1; Entry 3:

Sample Chromatograms

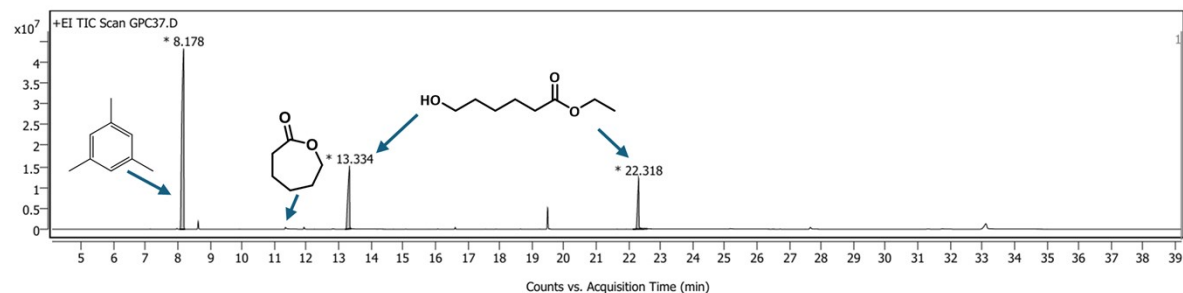

Chromatogram Peaks

| Peak | Start  | RT     | End    | Height   | Area      | Area % | SNR |
|------|--------|--------|--------|----------|-----------|--------|-----|
| 1    | 8.052  | 8.178  | 8.218  | 43053845 | 183916064 | 100.00 |     |
| 2    | 13.197 | 13.334 | 13.391 | 15035196 | 58431082  | 31.77  |     |
| 3    | 22.140 | 22.318 | 22.598 | 12178582 | 34862724  | 18.96  |     |

Sample Spectra

+ Scan (rt: 11.308-11.423 min)

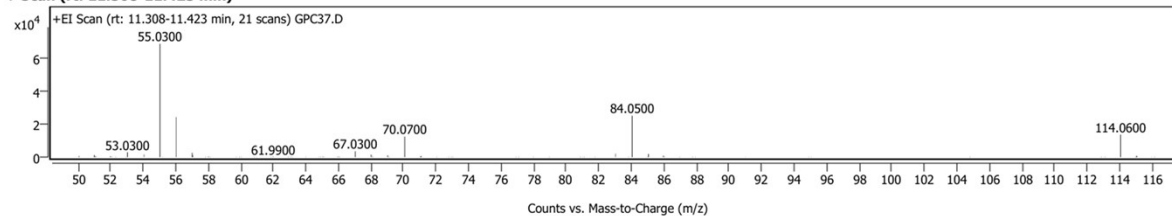

+ Scan (rt: 13.202-13.431 min)

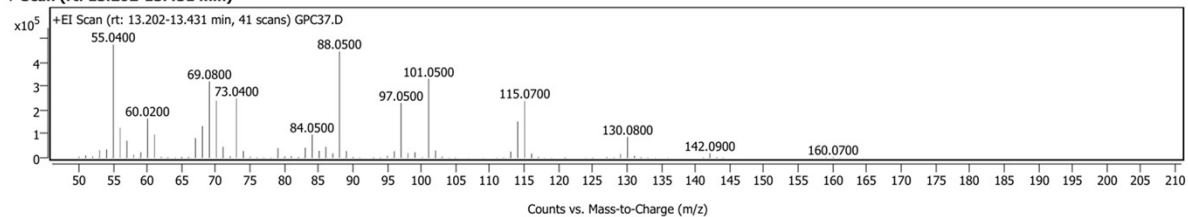

+ Scan (rt: 22.232-22.363 min)

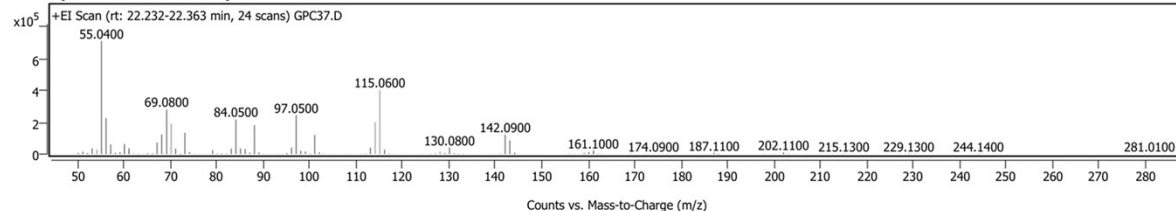

Figure S16. GC-MS data of the reaction mixture resulting from the reaction corresponding to Table S1; Entry 3.

Table S1; Entry 4

### Sample Chromatograms

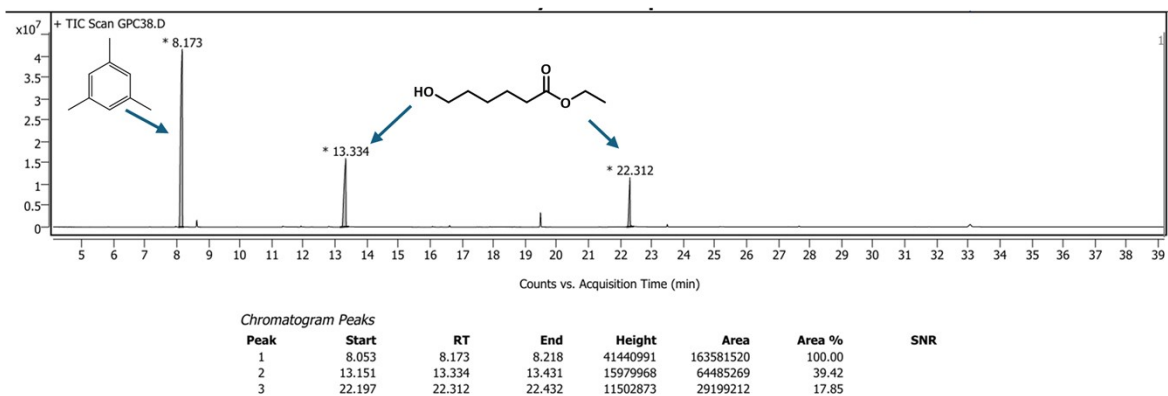

### Sample Spectra

#### + Scan (rt: 13.179-13.483 min)

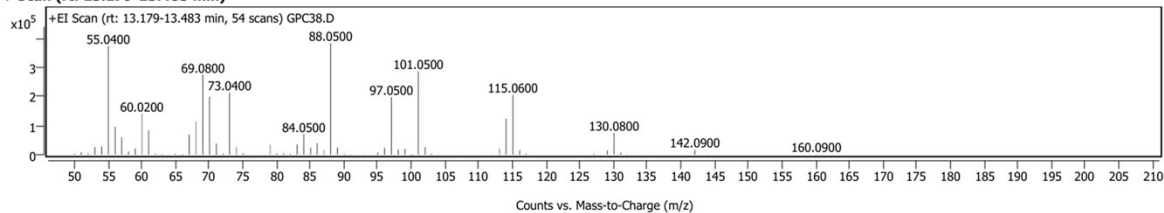

#### + Scan (rt: 22.123-22.484 min)

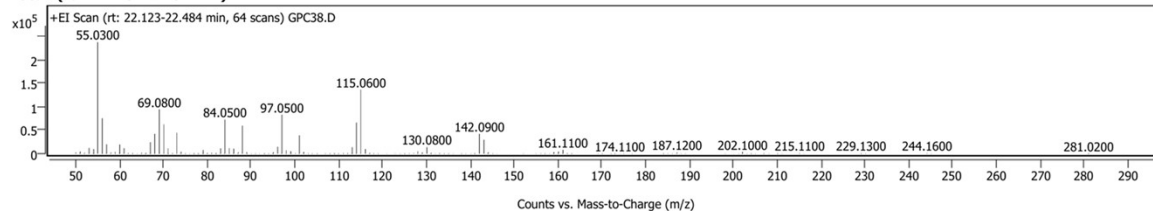

**Figure S17.** GC-MS data of the reaction mixture resulting from the reaction corresponding to Table S1; Entry 4.

Table S1; Entry 5

# Sample Chromatograms

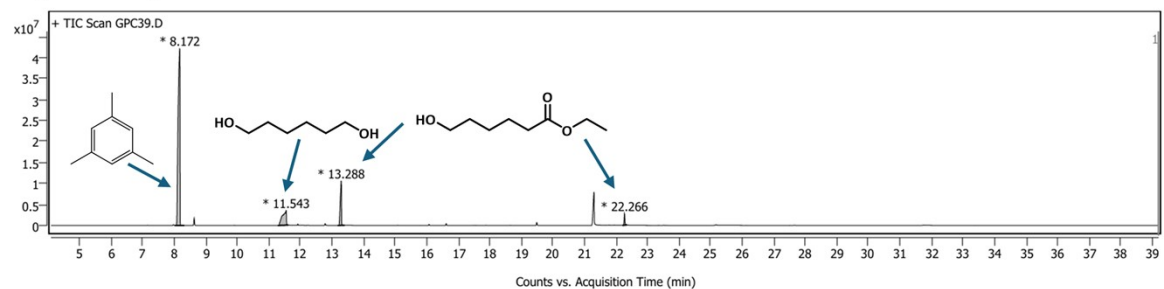

Chromatogram Peaks

| Peak | Start  | RT     | End    | Height   | Area      | Area % | SNR |
|------|--------|--------|--------|----------|-----------|--------|-----|
| 1    | 8.018  | 8.172  | 8.315  | 42166562 | 171687092 | 100.00 |     |
| 2    | 11.285 | 11.543 | 11.611 | 3497659  | 30401915  | 17.71  |     |
| 3    | 13.179 | 13.288 | 13.397 | 10520258 | 27377143  | 15.95  |     |
| 4    | 22.203 | 22.266 | 22.346 | 2747357  | 4509926   | 2.63   |     |

## + Scan (rt: 11.308-11.577 min)

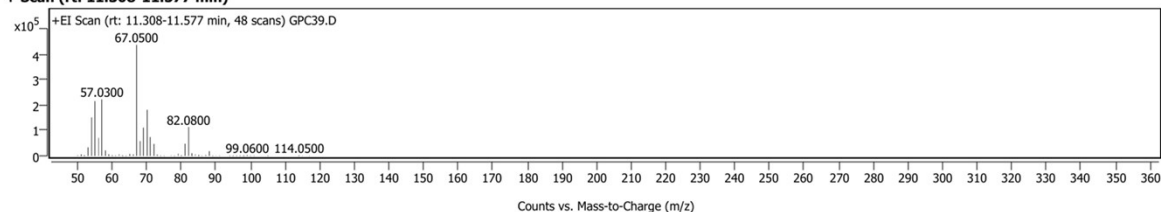

## + Scan (rt: 13.122-13.431 min)

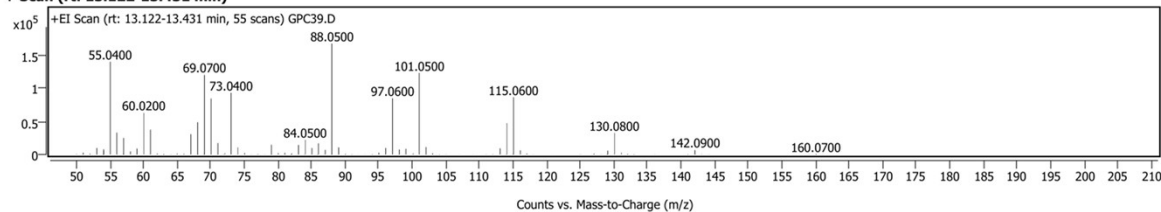

## + Scan (rt: 22.180-22.403 min)

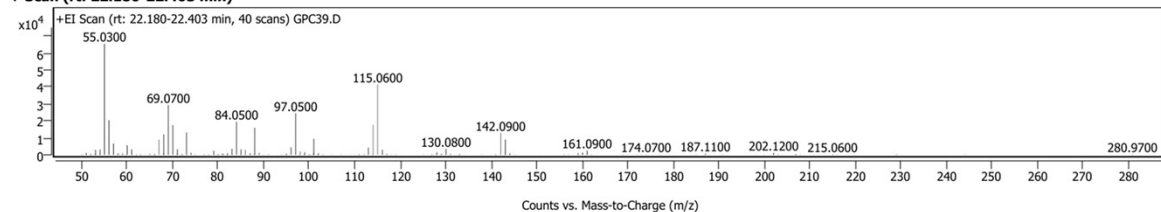

**Figure S18.** GC-MS data of the reaction mixture resulting from the reaction corresponding to Table S1; Entry 5.

Table S1; Entry 6:

## Sample Chromatograms

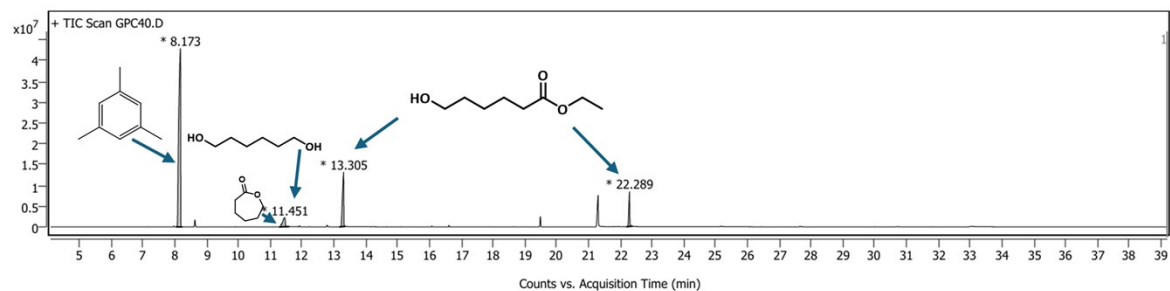

Chromatogram Peaks

| Peak | Start  | RT     | End    | Height   | Area      | Area % | SNR |
|------|--------|--------|--------|----------|-----------|--------|-----|
| 1    | 8.035  | 8.173  | 8.236  | 42893495 | 175547490 | 100.00 |     |
| 2    | 11.274 | 11.451 | 11.595 | 2170632  | 13041993  | 7.43   |     |
| 3    | 13.168 | 13.305 | 13.357 | 13112016 | 38735477  | 22.07  |     |
| 4    | 22.192 | 22.289 | 22.386 | 8423945  | 16902152  | 9.63   |     |

## Sample Spectra

### + Scan (rt: 11.360-11.537 min)

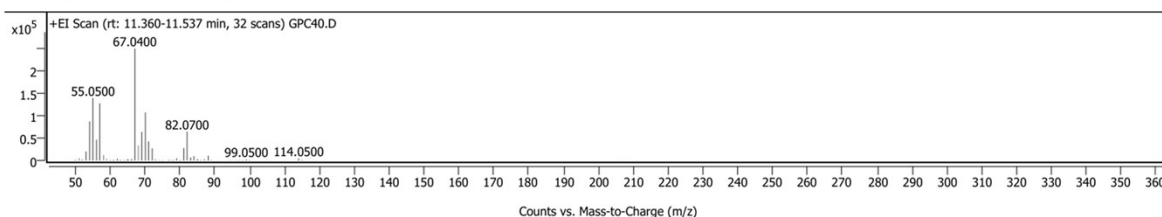

### + Scan (rt: 11.308-11.354 min)

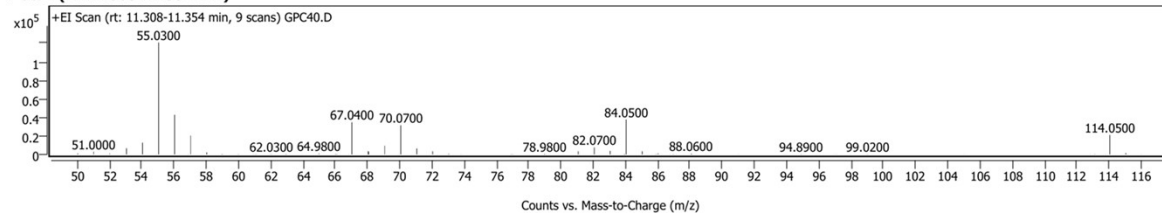

### + Scan (rt: 13.180-13.374 min)

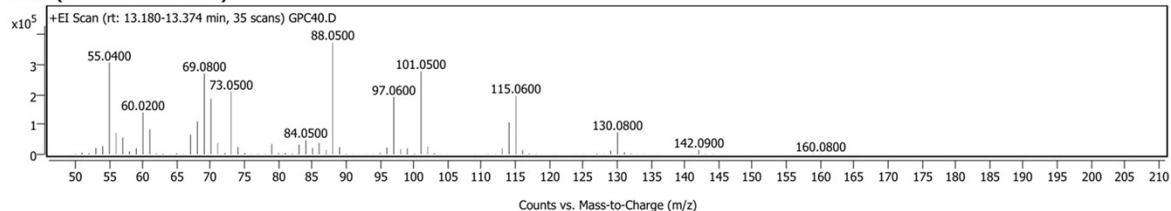

### + Scan (rt: 22.209-22.346 min)

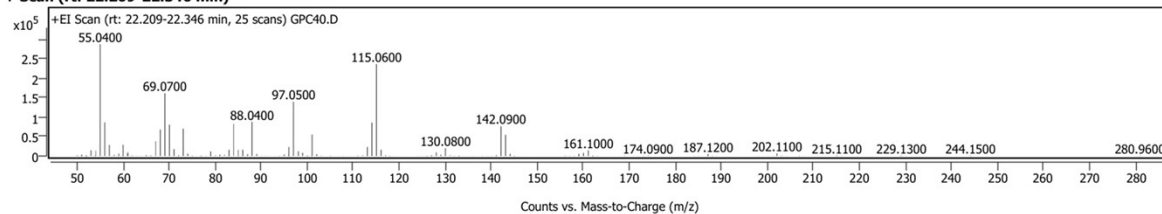

**Figure S19.** GC-MS data of the reaction mixture resulting from the reaction corresponding to Table S1; Entry 6.

Table S1; Entry 7:

### Sample Chromatograms

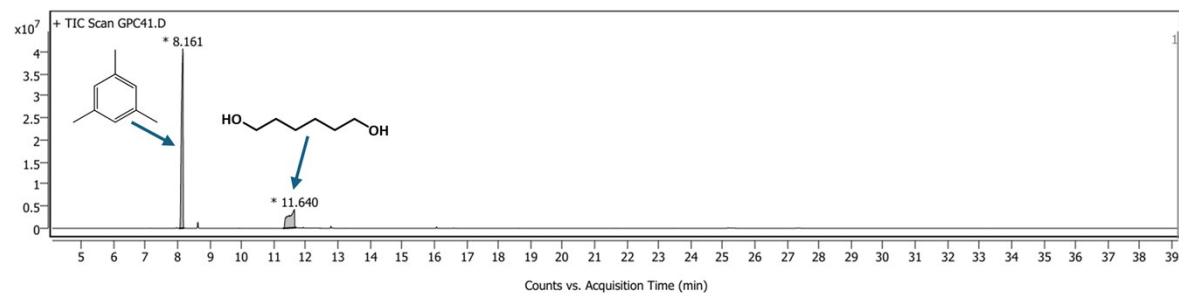

#### Chromatogram Peaks

| Peak | Start  | RT     | End    | Height   | Area      | Area % | SNR |
|------|--------|--------|--------|----------|-----------|--------|-----|
| 1    | 8.047  | 8.161  | 8.201  | 40575809 | 146459168 | 100.00 |     |
| 2    | 11.286 | 11.640 | 11.703 | 4115618  | 54559931  | 37.25  |     |

### Sample Spectra

+ Scan (rt: 11.303-11.680 min)

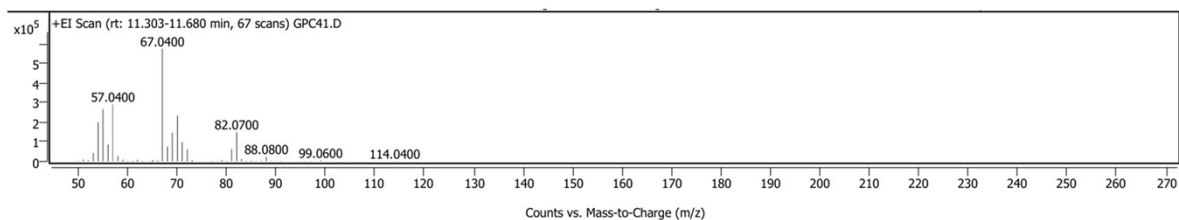

**Figure S20.** GC-MS data of the reaction mixture resulting from the reaction corresponding to Table S1; Entry 7.

Table S1; Entry 8:

### Sample Chromatograms

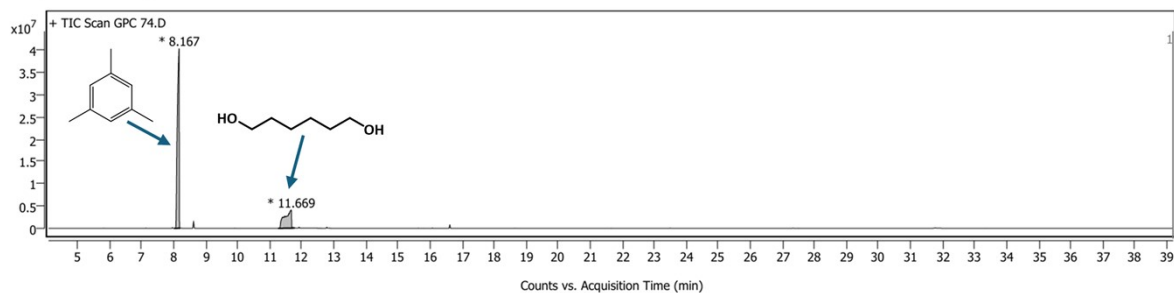

#### Chromatogram Peaks

| Peak | Start  | RT     | End    | Height   | Area      | Area % | SNR |
|------|--------|--------|--------|----------|-----------|--------|-----|
| 1    | 8.018  | 8.167  | 8.201  | 40286202 | 160745948 | 100.00 |     |
| 2    | 11.263 | 11.669 | 11.778 | 3993432  | 58942166  | 36.67  |     |

### Sample Spectra

+ Scan (rt: 11.309-11.692 min)

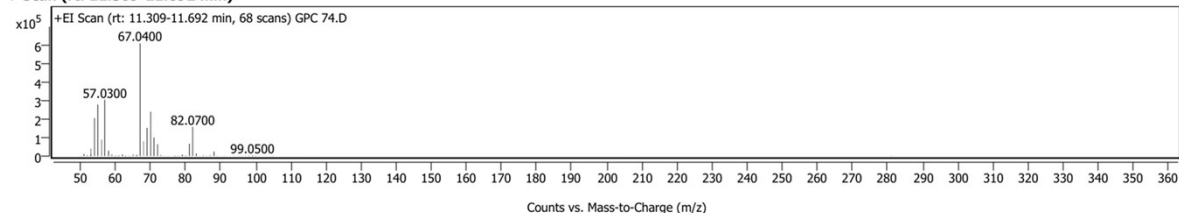

**Figure S21.** GC-MS data of the reaction mixture resulting from the reaction corresponding to Table S1; Entry 8.

Table S1; Entry 9:



### Sample Chromatograms

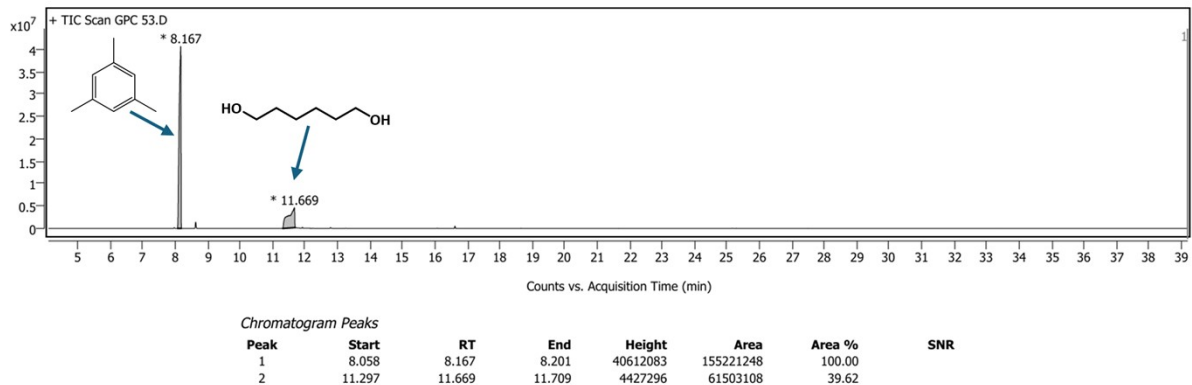

### Sample Spectra

+ Scan (rt: 11.291-11.824 min)

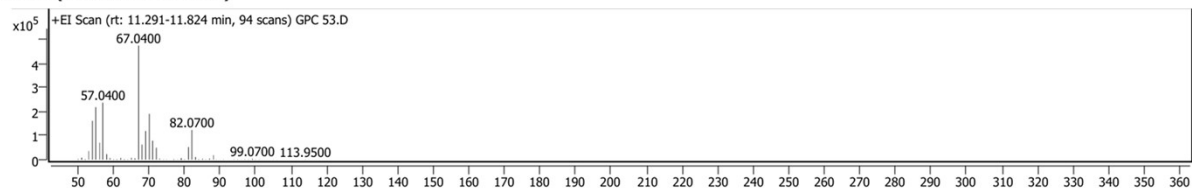

Figure S22. GC-MS data of the reaction mixture resulting from the reaction corresponding to Table S1; Entry 9.

Table S1; Entry 10:

### Sample Chromatograms

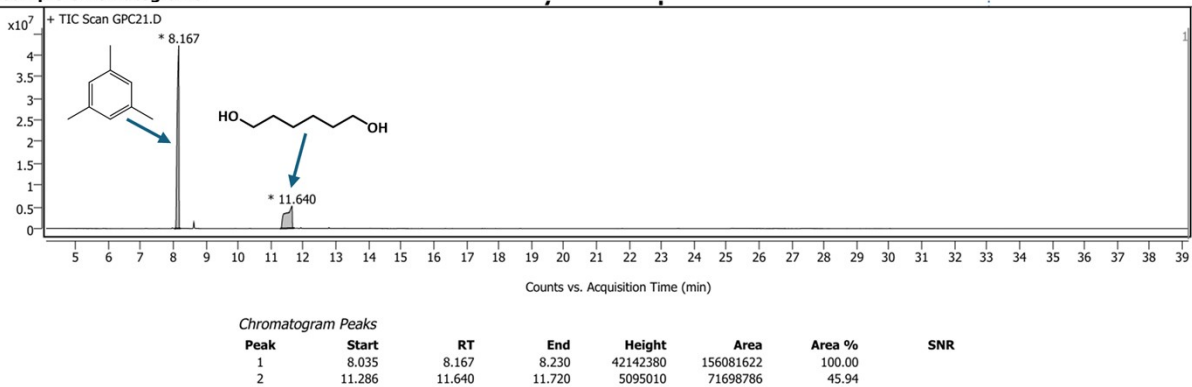

### Sample Spectra

+ Scan (rt: 11.291-11.726 min)

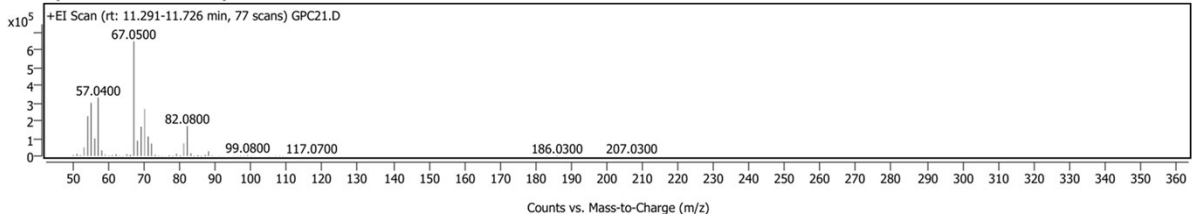

Figure S23. GC-MS data of the reaction mixture resulting from the reaction corresponding to Table S1; Entry 10.

Table S1; Entry 11:

## Sample Chromatograms

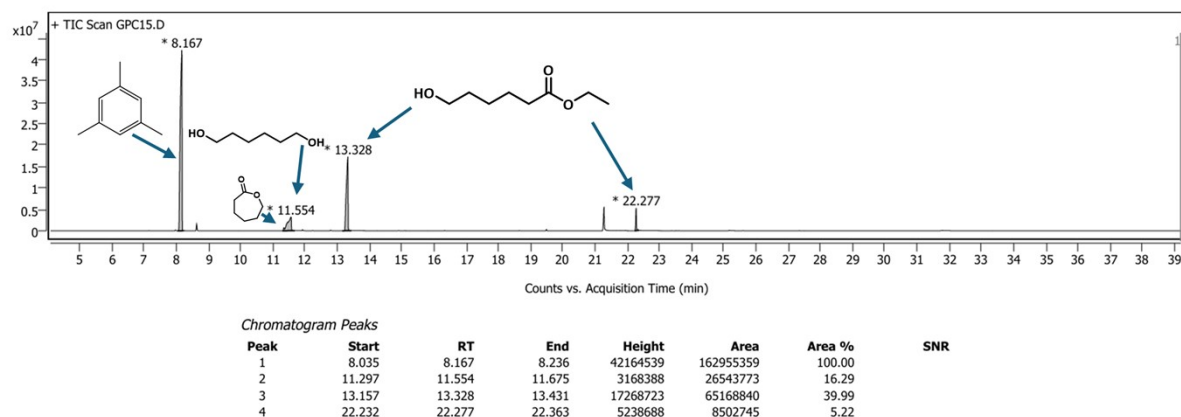

## Sample Spectra

### + Scan (rt: 11.291-11.366 min)

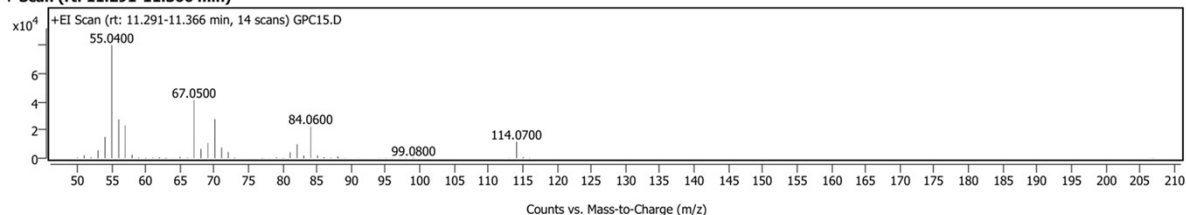

### + Scan (rt: 11.383-11.600 min)

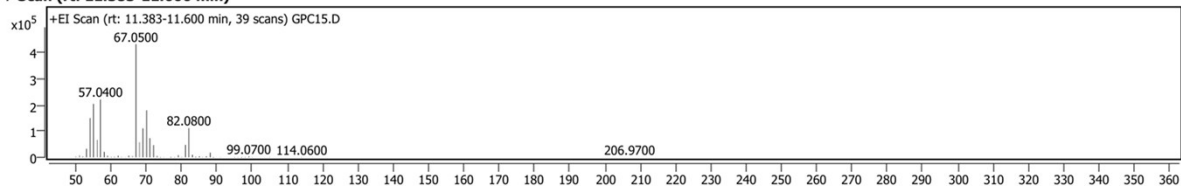

### + Scan (rt: 13.197-13.391 min)

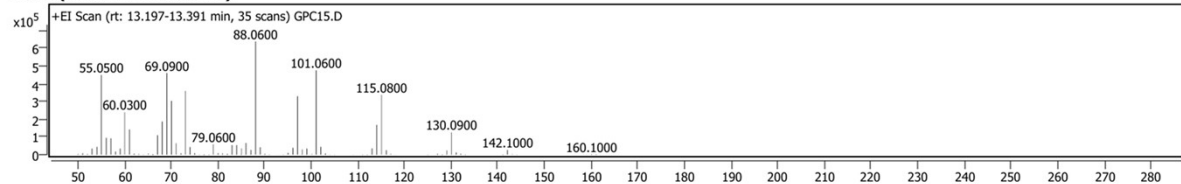

### + Scan (rt: 22.192-22.363 min)

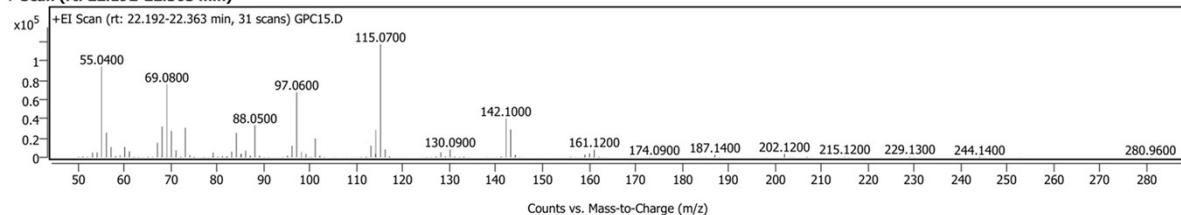

**Figure S24.** GC-MS data of the reaction mixture resulting from the reaction corresponding to Table S1; Entry 11.

Table S1; Entry 12:

## Sample Chromatograms

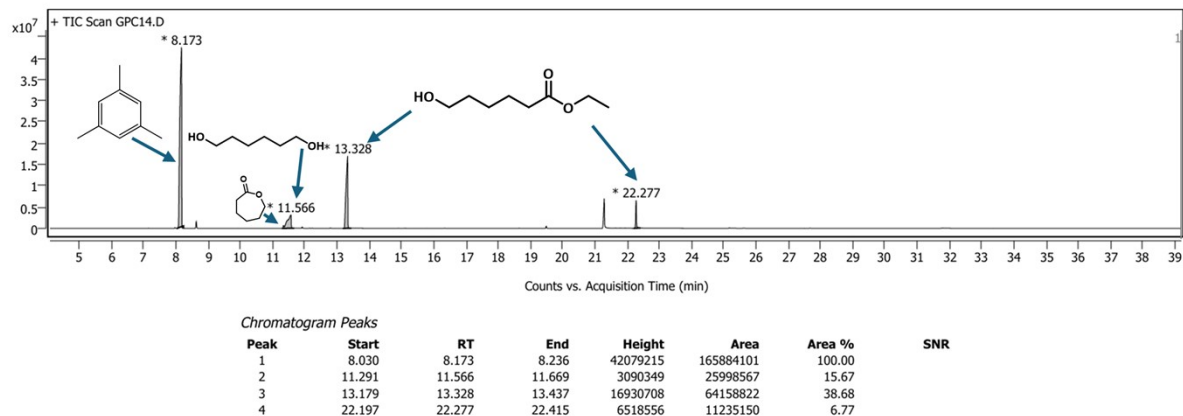

## Sample Spectra

### + Scan (rt: 11.291-11.354 min)

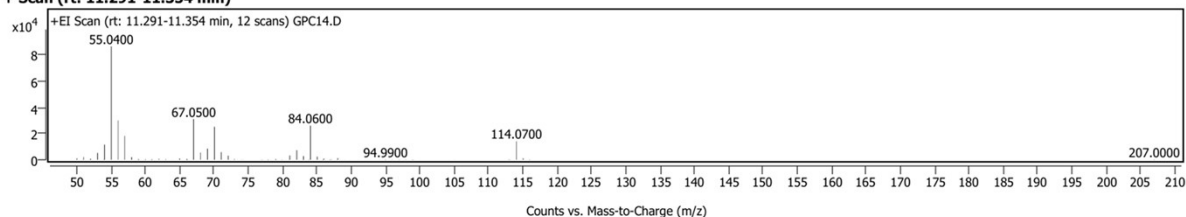

### + Scan (rt: 11.383-11.646 min)

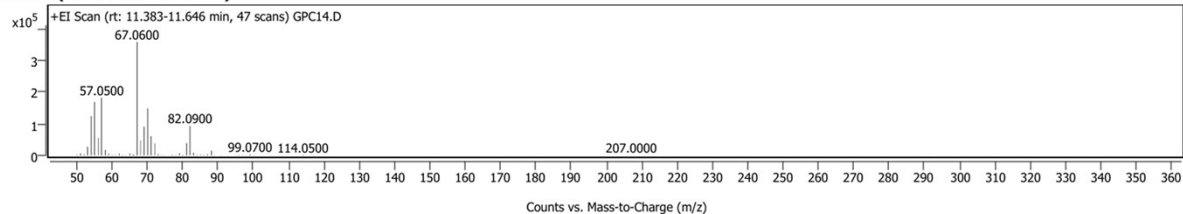

### + Scan (rt: 13.185-13.414 min)

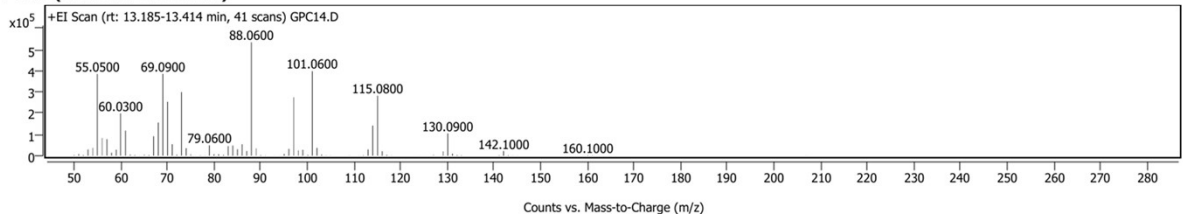

### + Scan (rt: 22.214-22.409 min)

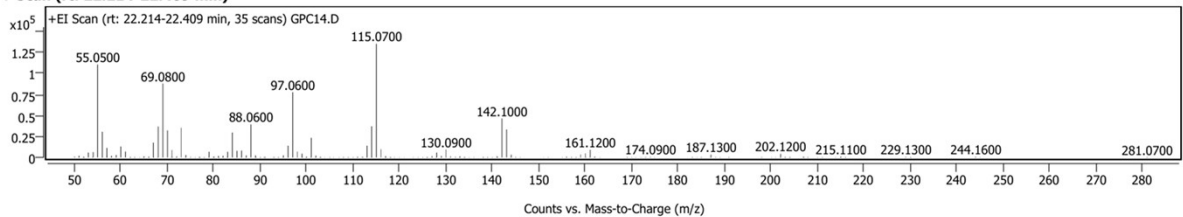

**Figure S25.** GC-MS data of the reaction mixture resulting from the reaction corresponding to Table S1; Entry 12.

Table S1; Entry 13:

## Sample Chromatograms

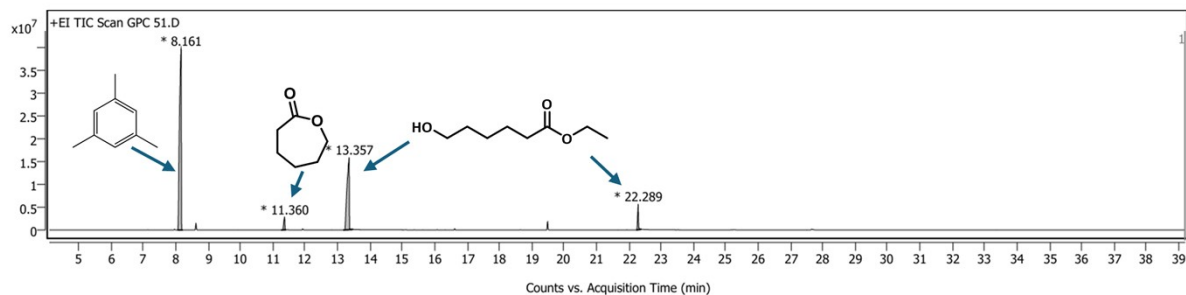

Chromatogram Peaks

| Peak | Start  | RT     | End    | Height   | Area      | Area % | SNR |
|------|--------|--------|--------|----------|-----------|--------|-----|
| 1    | 8.053  | 8.161  | 8.207  | 39639283 | 155520799 | 100.00 |     |
| 2    | 11.257 | 11.360 | 11.406 | 2753232  | 6508300   | 4.18   |     |
| 3    | 13.174 | 13.357 | 13.477 | 15766528 | 76466297  | 49.17  |     |
| 4    | 22.232 | 22.289 | 22.386 | 5613674  | 10305655  | 6.63   |     |

## Sample Spectra

### + Scan (rt: 11.280-11.411 min)

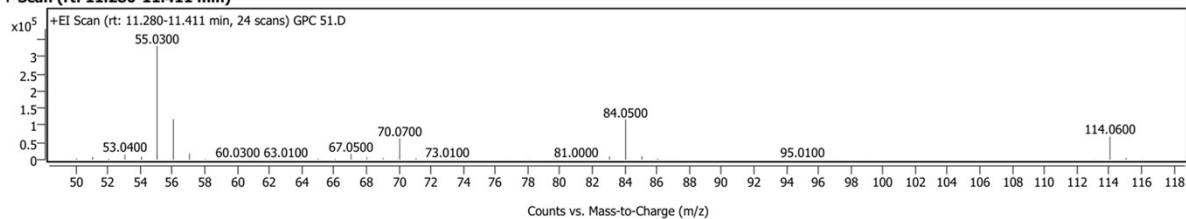

### + Scan (rt: 13.185-13.454 min)

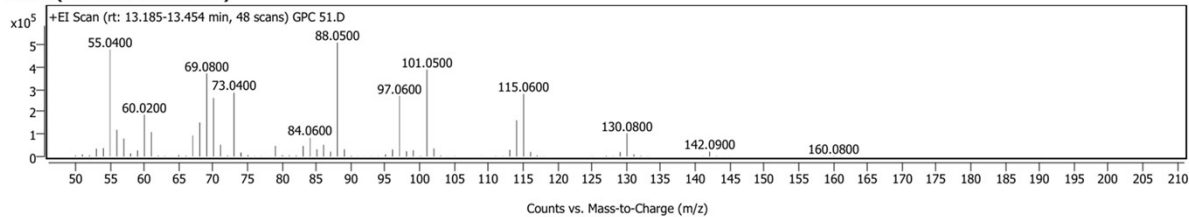

### + Scan (rt: 22.226-22.358 min)

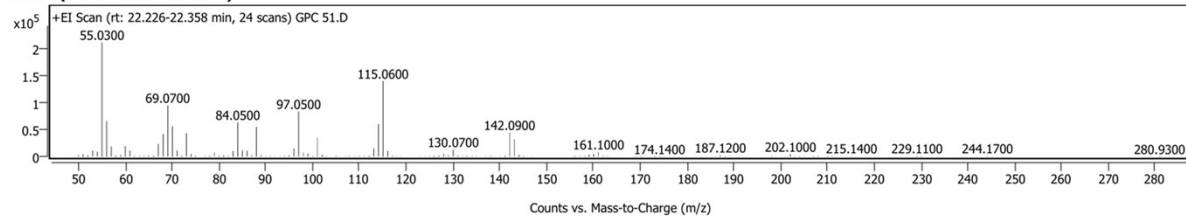

Figure S26. GC-MS data of the reaction mixture resulting from the reaction corresponding to Table S1; Entry 13.

Table S1; Entry 14:

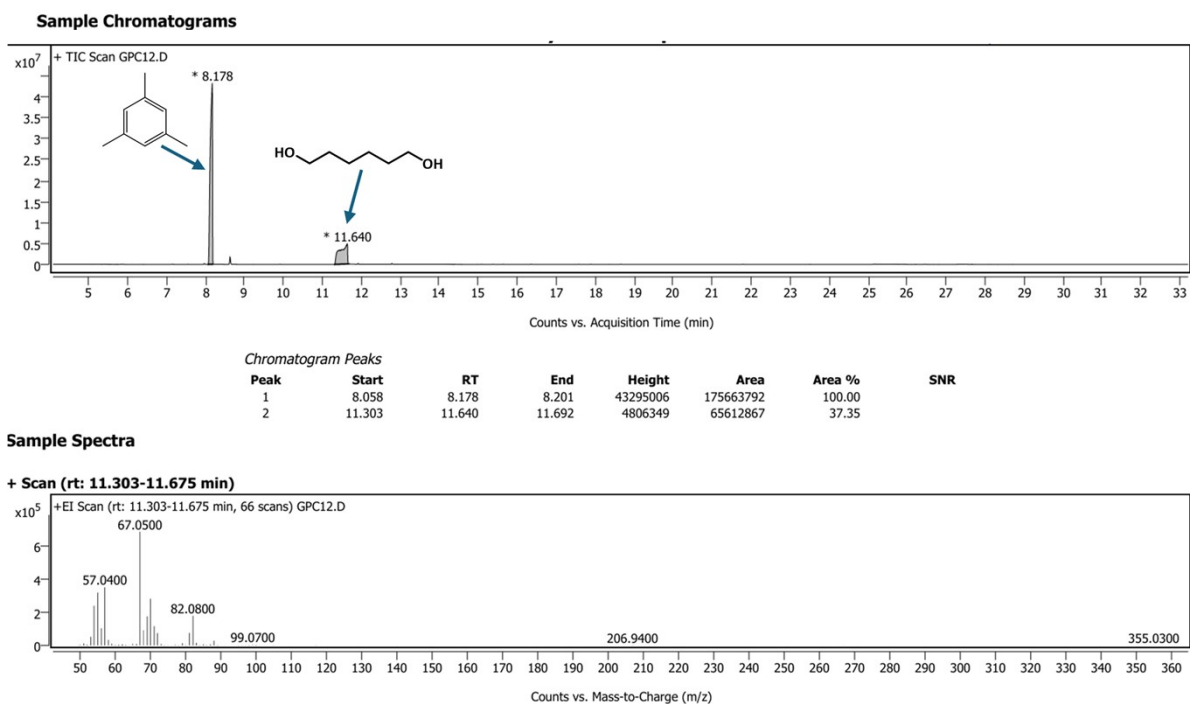

**Figure S27.** GC-MS data of the reaction mixture resulting from the reaction corresponding to Table S1; Entry 14.

Table S1; Entry 15:

No reaction

Table S1; Entry 16:

## Sample Chromatograms

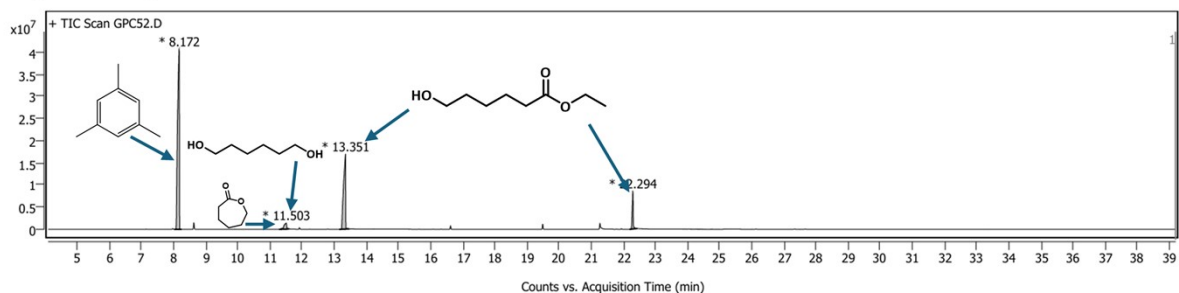

Chromatogram Peaks

| Peak | Start  | RT     | End    | Height   | Area      | Area % | SNR |
|------|--------|--------|--------|----------|-----------|--------|-----|
| 1    | 8.024  | 8.172  | 8.247  | 40660705 | 157650661 | 100.00 |     |
| 2    | 11.285 | 11.503 | 11.594 | 1351029  | 7918842   | 5.02   |     |
| 3    | 13.156 | 13.351 | 13.465 | 16948097 | 75236712  | 47.72  |     |
| 4    | 22.192 | 22.294 | 22.432 | 8624638  | 18423652  | 11.69  |     |

## Sample Spectra

### + Scan (rt: 11.325-11.388 min)

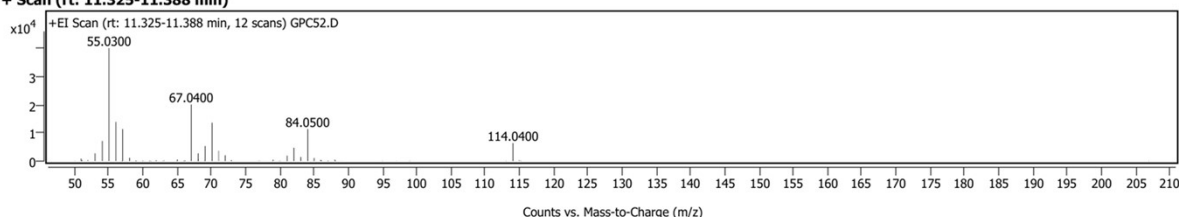

### + Scan (rt: 11.394-11.583 min)

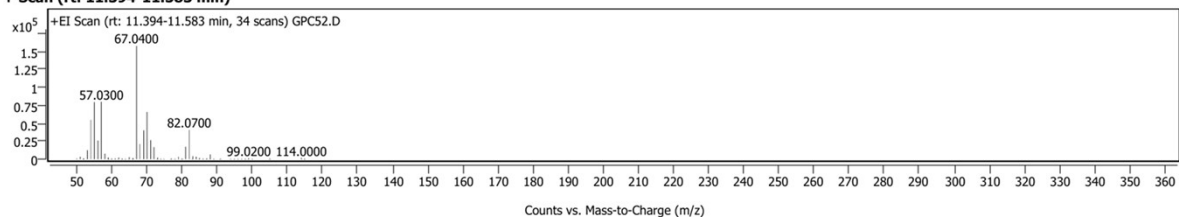

### + Scan (rt: 13.151-13.431 min)

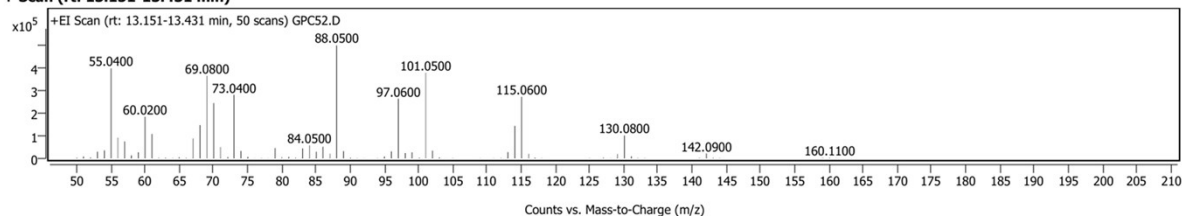

### + Scan (rt: 22.209-22.455 min)

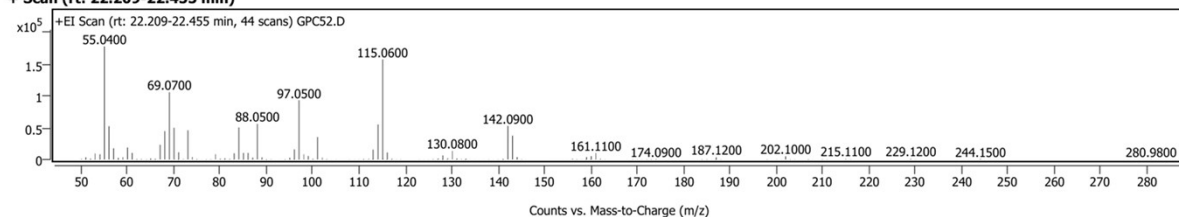

**Figure S28.** GC-MS data of the reaction mixture resulting from the reaction corresponding to Table S1; Entry 16.

Table S1; Entry 17:

### Sample Chromatograms

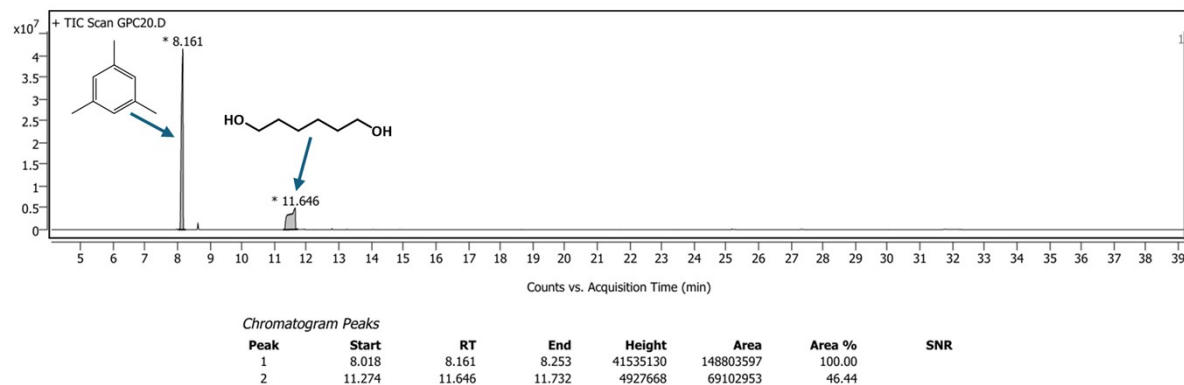

### Sample Spectra

+ Scan (rt: 11.240-11.749 min)

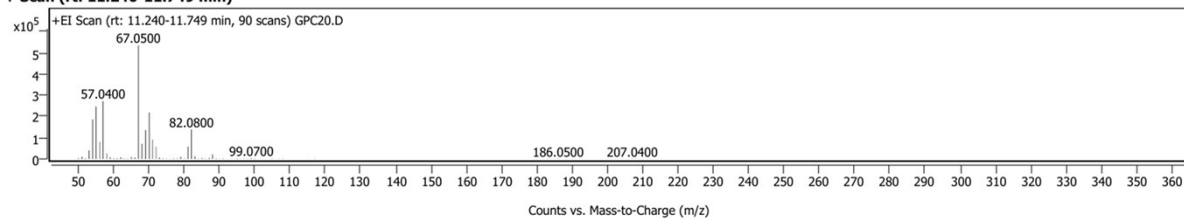

**Figure S29.** GC-MS data of the reaction mixture resulting from the reaction corresponding to Table S1; Entry 17.

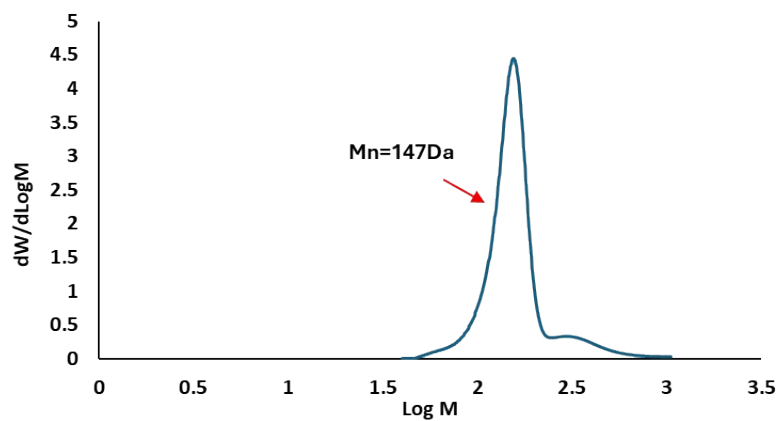

**Figure S30.** GPC data of the reaction mixture resulting from the reaction corresponding to Table S1; Entry 17.

Table S1; Entry 18:

### Sample Chromatograms

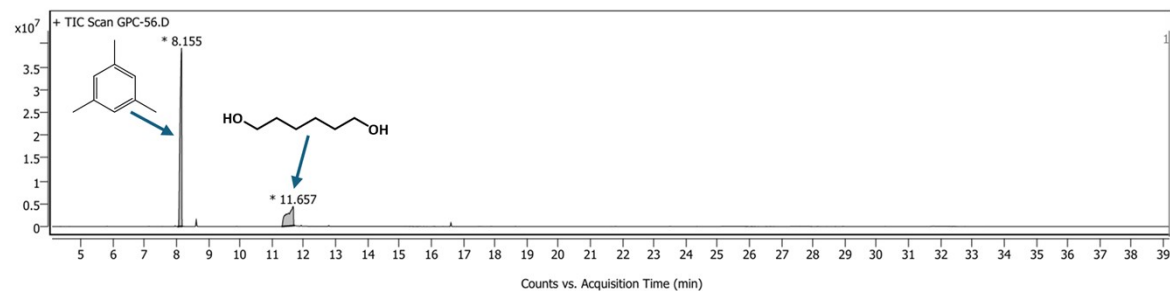

Chromatogram Peaks

| Peak | Start  | RT     | End    | Height   | Area      | Area % | SNR |
|------|--------|--------|--------|----------|-----------|--------|-----|
| 1    | 8.030  | 8.155  | 8.190  | 39108909 | 147519034 | 100.00 |     |
| 2    | 11.303 | 11.657 | 11.709 | 4197514  | 59107490  | 40.07  |     |

### Sample Spectra

+ Scan (rt: 11.280-11.709 min)

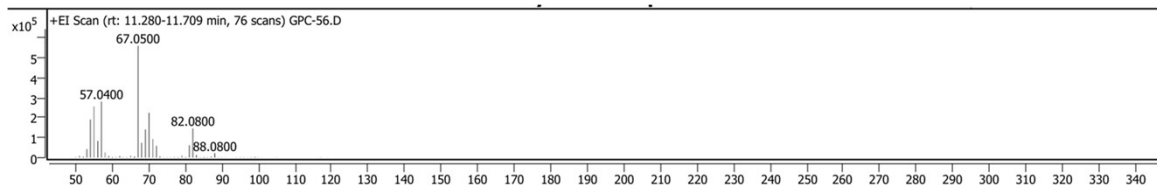

**Figure S31.** GC-MS data of the reaction mixture resulting from the reaction corresponding to Table S1; Entry 18.

Table S1; Entry 19:

### Sample Chromatograms

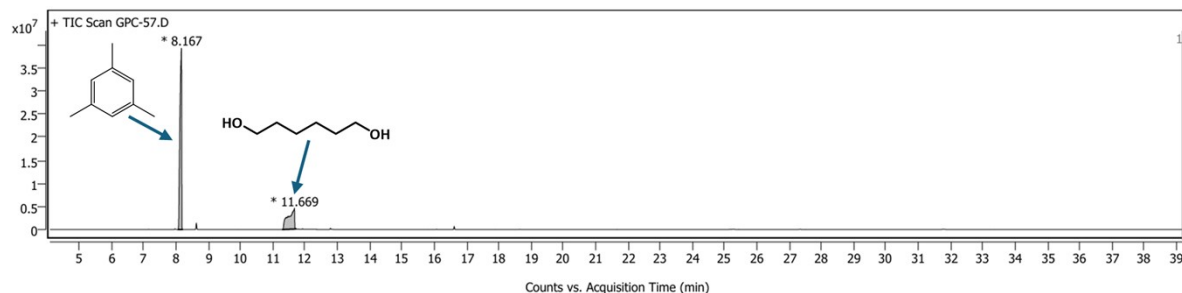

Chromatogram Peaks

| Peak | Start  | RT     | End    | Height   | Area      | Area % | SNR |
|------|--------|--------|--------|----------|-----------|--------|-----|
| 1    | 8.053  | 8.167  | 8.207  | 39325088 | 147568561 | 100.00 |     |
| 2    | 11.291 | 11.669 | 11.726 | 4429319  | 60697495  | 41.13  |     |

### Sample Spectra

+ Scan (rt: 11.234-11.766 min)

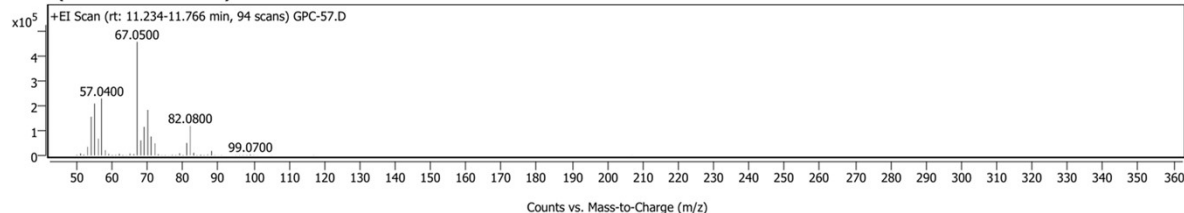

**Figure S32.** GC-MS data of the reaction mixture resulting from the reaction corresponding to Table S1; Entry 19.

Table S1; Entry 20:



### Sample Chromatograms

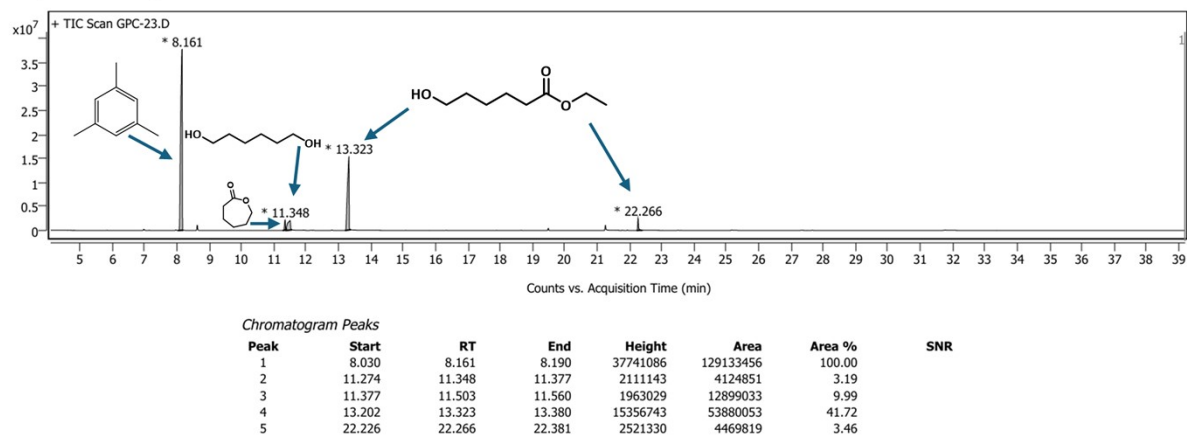

### Sample Spectra

#### + Scan (rt: 11.286-11.377 min)

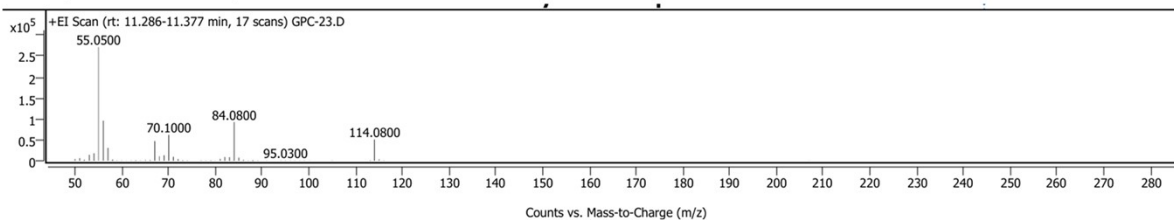

#### + Scan (rt: 11.389-11.577 min)

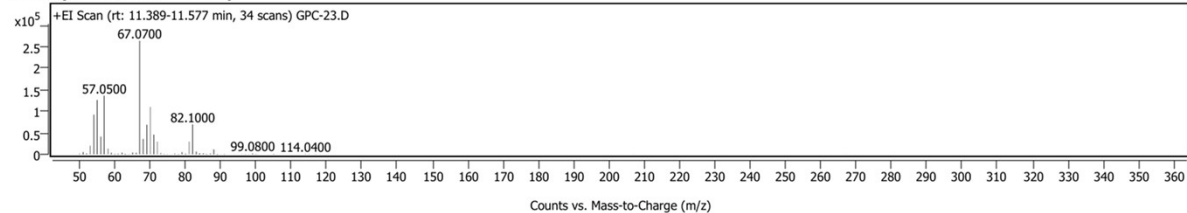

#### + Scan (rt: 13.197-13.374 min)

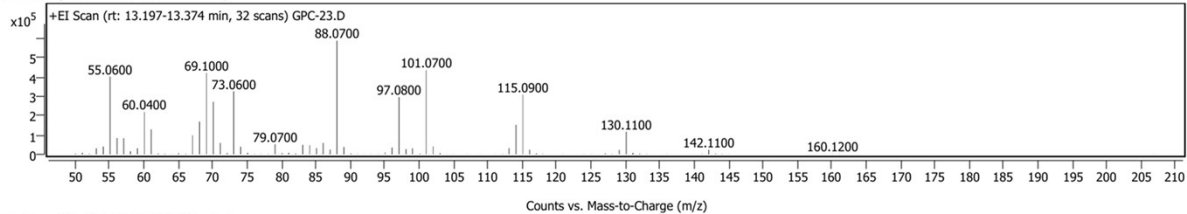

#### + Scan (rt: 22.197-22.358 min)

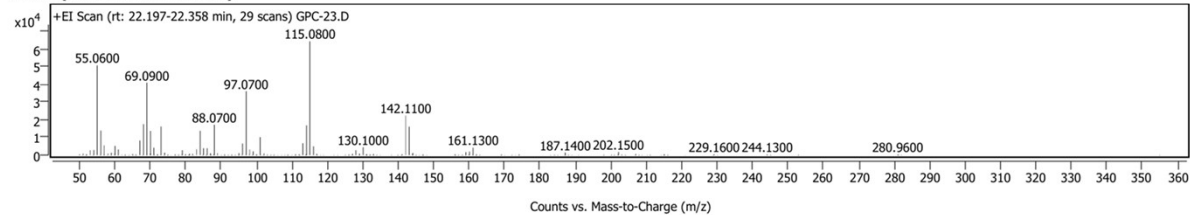

**Figure S33.** GC-MS data of the reaction mixture resulting from the reaction corresponding to Table S1; Entry 20.

Table S1; Entry 21:

### Sample Chromatograms

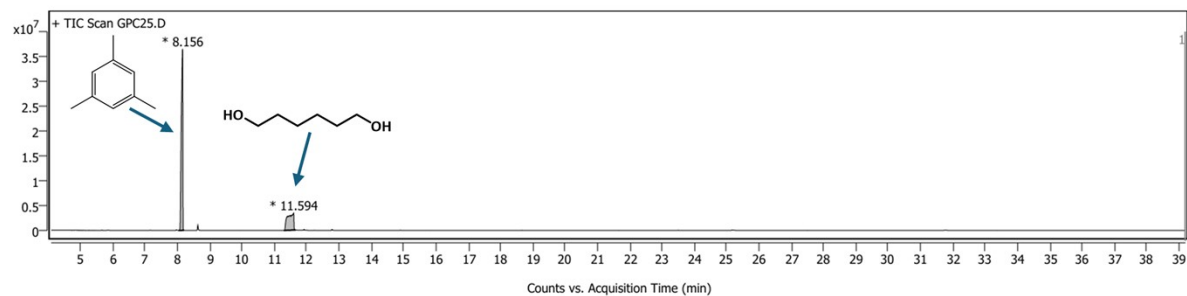

Chromatogram Peaks

| Peak | Start  | RT     | End    | Height   | Area      | Area % | SNR |
|------|--------|--------|--------|----------|-----------|--------|-----|
| 1    | 8.035  | 8.156  | 8.196  | 36479353 | 122054130 | 100.00 |     |
| 2    | 11.297 | 11.594 | 11.652 | 3434485  | 45789970  | 37.52  |     |

### Sample Spectra

#### + Scan (rt: 11.297-11.663 min)

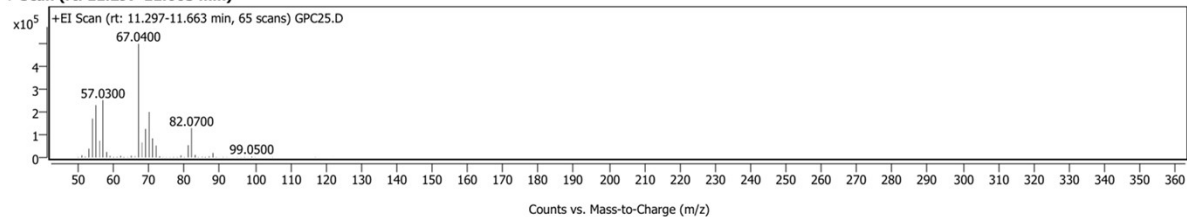

**Figure S34.** GC-MS data of the reaction mixture resulting from the reaction corresponding to Table S1; Entry 21.

Table S1; Entry 22:

Sample Chromatograms

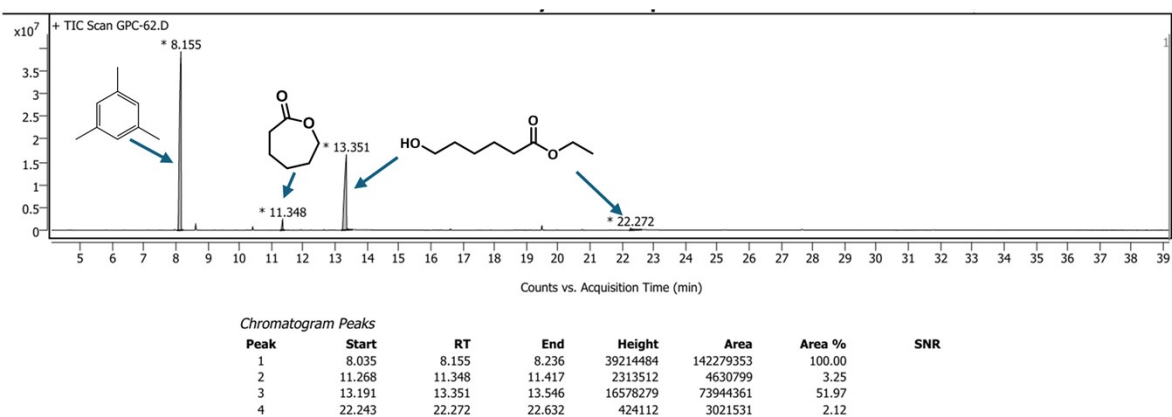

Sample Spectra

+ Scan (rt: 11.291-11.388 min)

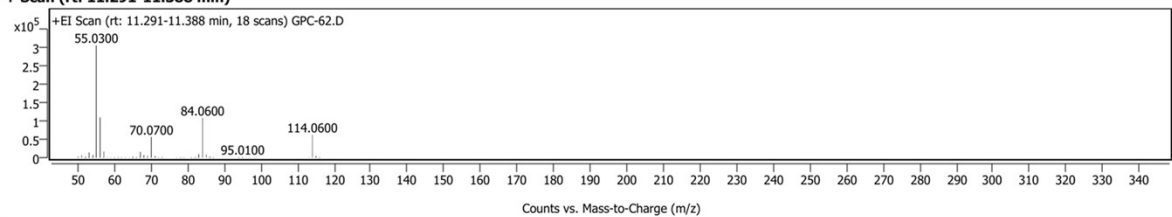

+ Scan (rt: 13.197-13.408 min)

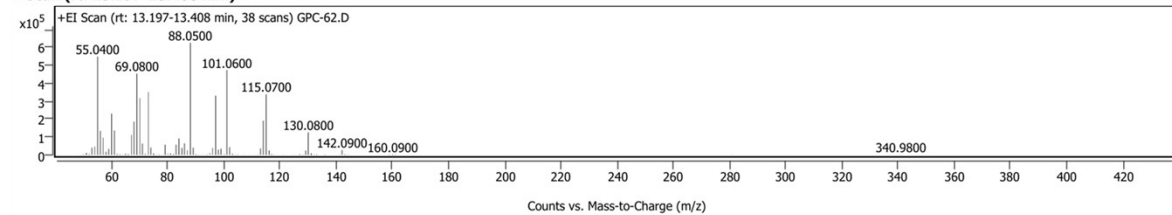

+ Scan (rt: 22.209-22.695 min)

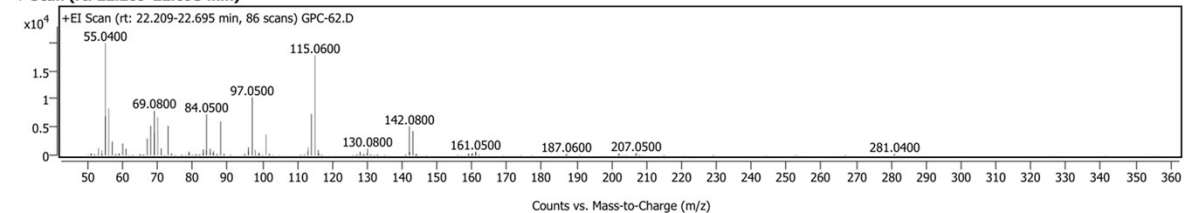

Figure S35. GC-MS data of the reaction mixture resulting from the reaction corresponding to Table S1; Entry 22.

Table S1; Entry 23:

### Sample Chromatograms

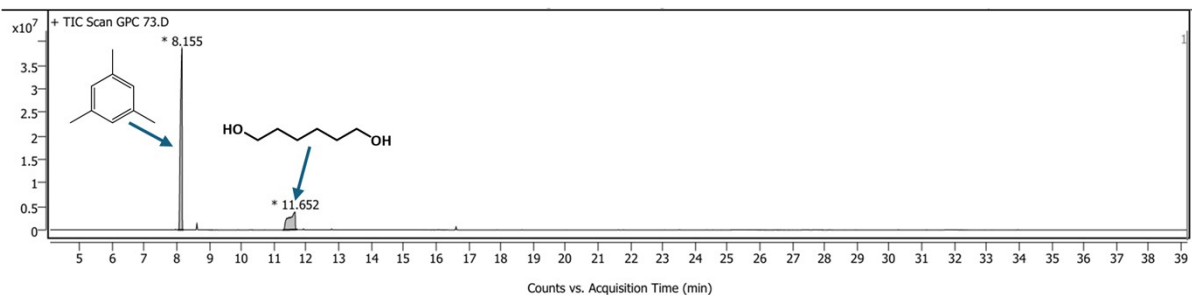

Chromatogram Peaks

| Peak | Start  | RT     | End    | Height   | Area      | Area % | SNR |
|------|--------|--------|--------|----------|-----------|--------|-----|
| 1    | 8.030  | 8.155  | 8.207  | 38537338 | 146130275 | 100.00 |     |
| 2    | 11.274 | 11.652 | 11.720 | 3711150  | 53255589  | 36.44  |     |

### Sample Spectra

#### + Scan (rt: 11.274-11.709 min)

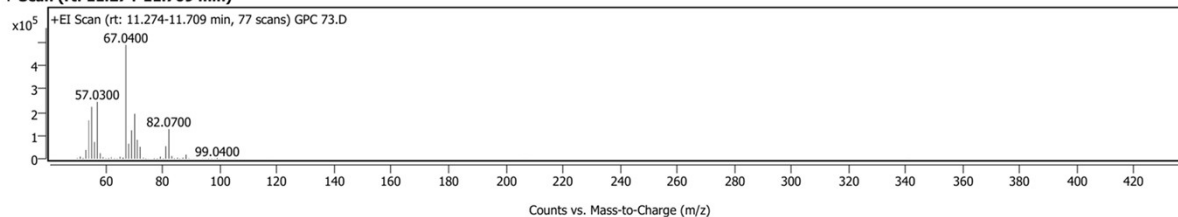

Figure S36. GC-MS data of the reaction mixture resulting from the reaction corresponding to Table S1; Entry 23.

### Table S1; Entry 24:

$^1\text{H}$  NMR (500 MHz,  $\text{CD}_2\text{Cl}_2$ ):  $\delta$  3.57 (t, HO-CH<sub>2</sub>-CH<sub>2</sub>-CH<sub>2</sub>-CH<sub>2</sub>-CH<sub>2</sub>-CH<sub>2</sub>-OH), 1.57 (t, HO-CH<sub>2</sub>-CH<sub>2</sub>-CH<sub>2</sub>-CH<sub>2</sub>-CH<sub>2</sub>-CH<sub>2</sub>-OH), 1.40 (t, HO-CH<sub>2</sub>-CH<sub>2</sub>-CH<sub>2</sub>-CH<sub>2</sub>-CH<sub>2</sub>-CH<sub>2</sub>-OH).

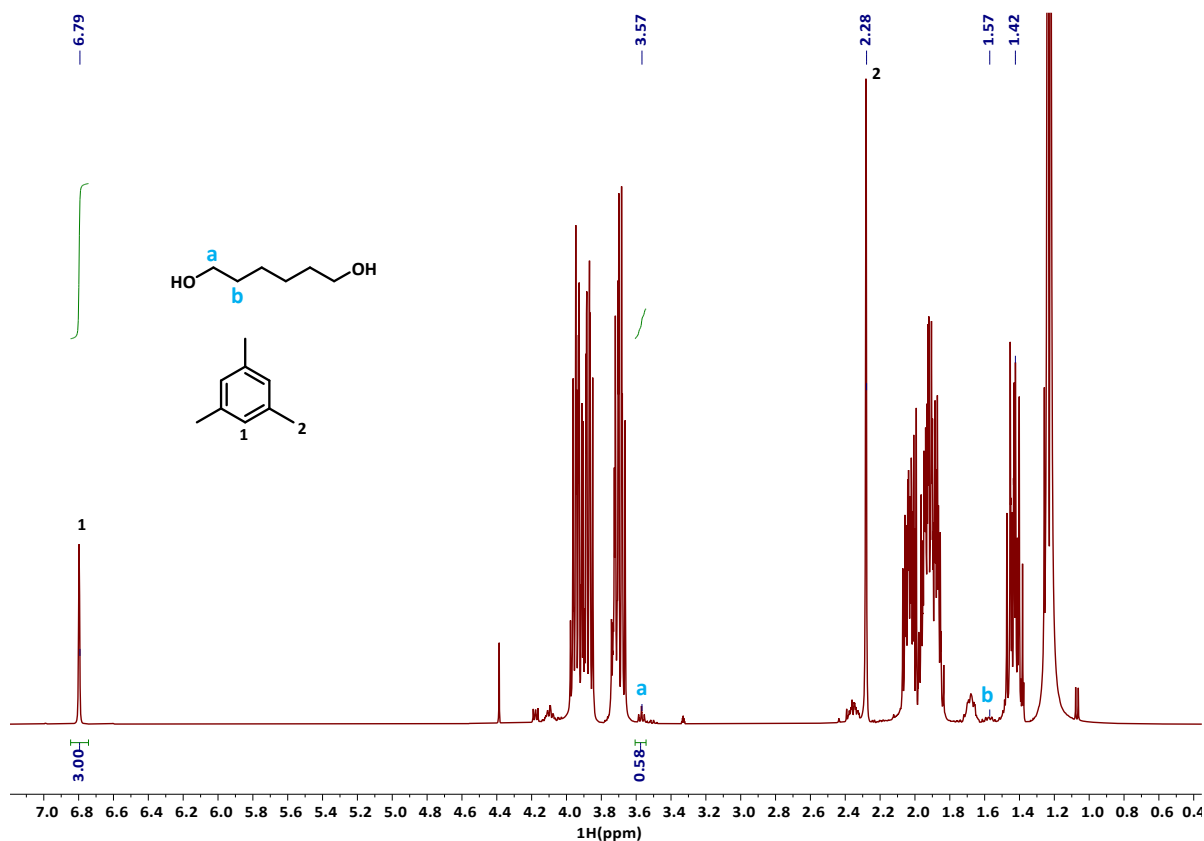

**Figure S37.**  $^1\text{H}$  NMR (400 MHz,  $\text{CD}_3\text{OD}$ ) spectrum of the reaction mixture resulting from the reaction corresponding to Table S1; Entry 24. Mesitylene is used as an internal standard.

Table S1; Entry 25:

#### Sample Chromatograms

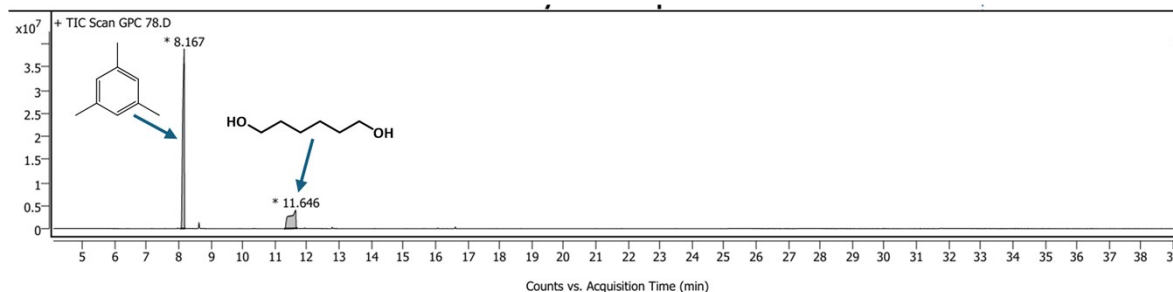

#### Chromatogram Peaks

| Peak | Start  | RT     | End    | Height   | Area      | Area % | SNR |
|------|--------|--------|--------|----------|-----------|--------|-----|
| 1    | 8.053  | 8.167  | 8.201  | 38902772 | 141019346 | 100.00 |     |
| 2    | 11.286 | 11.646 | 11.703 | 3917085  | 54139389  | 38.39  |     |

#### Sample Spectra

##### + Scan (rt: 11.257-11.697 min)

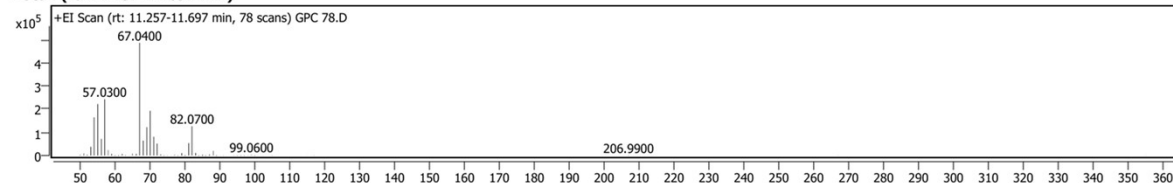

**Figure S38.** GC-MS data of the reaction mixture resulting from the reaction corresponding to Table S1; Entry 25.

Table S1; Entry 26:

#### Sample Chromatograms

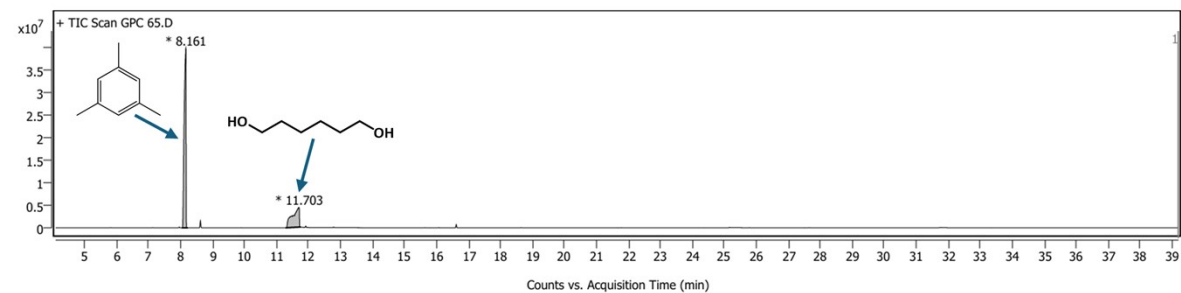

#### Chromatogram Peaks

| Peak | Start  | RT     | End    | Height   | Area      | Area % | SNR |
|------|--------|--------|--------|----------|-----------|--------|-----|
| 1    | 8.041  | 8.161  | 8.224  | 39895552 | 161903261 | 100.00 |     |
| 2    | 11.285 | 11.703 | 11.755 | 4330019  | 65788540  | 40.63  |     |

#### Sample Spectra

##### + Scan (rt: 11.285-11.755 min)

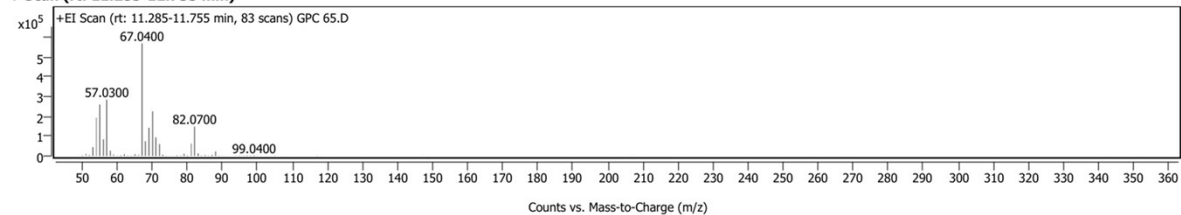

**Figure S39.** GC-MS data of the reaction mixture resulting from the reaction corresponding to Table S1; Entry 26.

Table S1; Entry 27:

## Sample Chromatograms

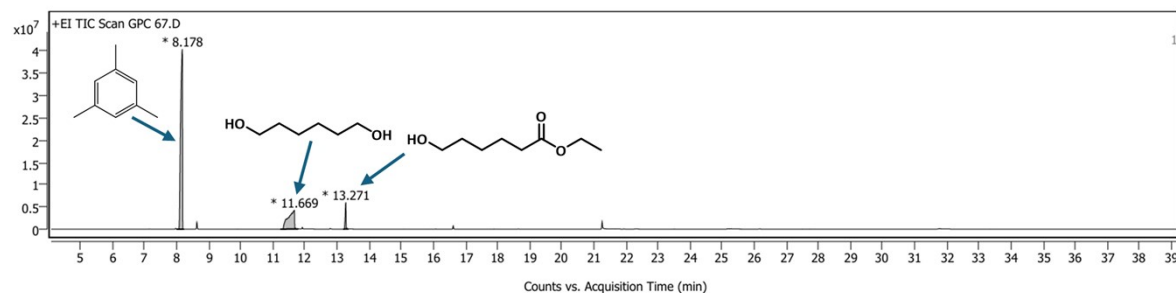

## Chromatogram Peaks

| Peak | Start  | RT     | End    | Height   | Area      | Area % | SNR |
|------|--------|--------|--------|----------|-----------|--------|-----|
| 1    | 8.001  | 8.178  | 8.230  | 40431049 | 166352914 | 100.00 |     |
| 2    | 11.234 | 11.669 | 11.789 | 4155666  | 58284532  | 35.04  |     |
| 3    | 13.191 | 13.271 | 13.351 | 5946552  | 11195951  | 6.73   |     |

## Sample Spectra

## + Scan (rt: 11.251-11.777 min)

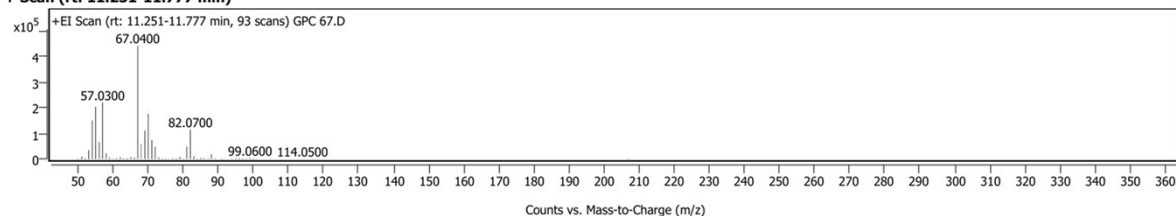

## + Scan (rt: 13.145-13.443 min)

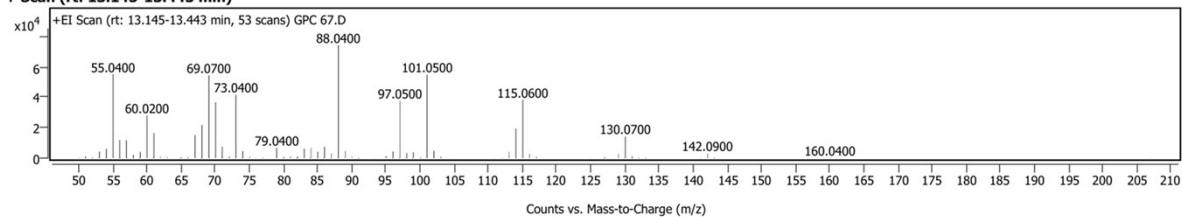

Figure S40. GC-MS data of the reaction mixture resulting from the reaction corresponding to Table S1; Entry 27.

## 9. Optimisation of Catalytic Conditions under solvent minimised conditions

Table S2. Optimisation of catalytic conditions for the hydrogenolysis of Polycaprolactone under solvent minimised conditions.

| $\text{PCL, } M_n, 80,000 \xrightarrow[2\text{-MeTHF/EtOH, } 80^\circ\text{C}]{\text{precatal, KOtBu, H}_2 \text{ (60 bar)}} \text{1,6-HD} + \text{E6HH} + \epsilon\text{-CPL}$ |             |                            |              |           |         |            |         |                     |                  |
|---------------------------------------------------------------------------------------------------------------------------------------------------------------------------------|-------------|----------------------------|--------------|-----------|---------|------------|---------|---------------------|------------------|
| Entry                                                                                                                                                                           | Precatalyst | Precatalyst loading (mol%) | KOtBu (mol%) | EtOH (mL) | Time, h | 1,6-HD (%) | EHH (%) | $\epsilon$ -CPL (%) | TON <sup>b</sup> |
| 1                                                                                                                                                                               | 8           | 0.05                       | 5            | 0.25      | 20      | 91         | 0       | 0                   | 1,820            |
| 2                                                                                                                                                                               | 8           | 0.01                       | 5            | 0.25      | 72      | 96         | 0       | 0                   | 9,600            |
| 3                                                                                                                                                                               | 8           | 0.005                      | 5            | 0.25      | 72      | 88         | 0       | 0                   | 17,600           |
| 4                                                                                                                                                                               | 7           | 0.05                       | 5            | 0.25      | 20      | 96         | 0       | 0                   | 1,920            |
| 5                                                                                                                                                                               | 7           | 0.01                       | 5            | 0.25      | 72      | 99         | 0       | 0                   | 9,900            |
| 6                                                                                                                                                                               | 7           | 0.005                      | 5            | 0.25      | 72      | 98         | 0       | 0                   | 19,600           |
| 7 <sup>c</sup>                                                                                                                                                                  | 8           | 0.005                      | 5            | 1.25      | 72      | 92         | 0       | 0                   | 18,400           |
| 8 <sup>c</sup>                                                                                                                                                                  | 7           | 0.005                      | 5            | 1.25      | 72      | 95         | 0       | 0                   | 19,000           |

<sup>a</sup>Polycaprolactone  $M_n = 80,000$  Da (1 mmol of monomeric unit), EtOH, KOtBu, precatalyst 8 (2,5 mM solution in 2-Me THF), precatalyst 7 (2 mM solution in EtOH) 80 °C, 60 bar H<sub>2</sub>. Yields were estimated by quantitative GC-MS analysis using mesitylene as an internal standard. <sup>b</sup>TON estimated based on the number of ester groups hydrogenated. <sup>c</sup>5 mmol of PCL used (relative to the monomeric unit).

Table S2; Entry 1:

### Sample Chromatograms

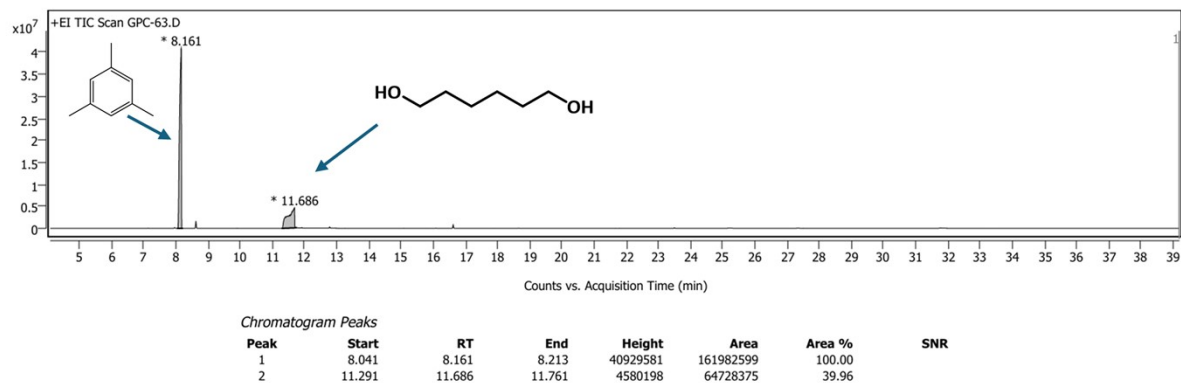

### Sample Spectra

+ Scan (rt: 11.269-11.755 min)

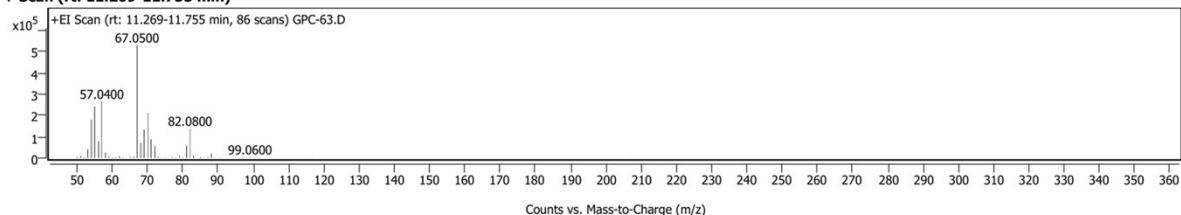

**Figure S41.** GC-MS data of the reaction mixture resulting from the reaction corresponding to Table S2; Entry 1.

Table S2; Entry 2:

### Sample Chromatograms

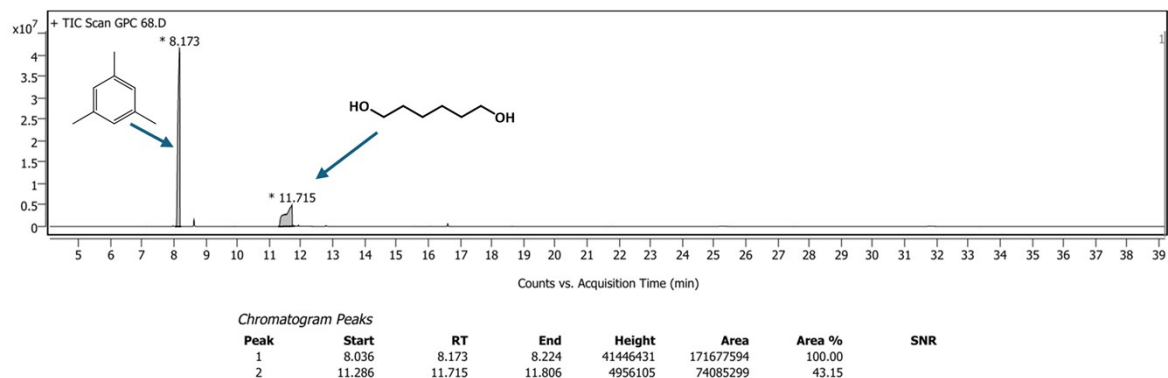

### Sample Spectra

+ Scan (rt: 11.148-11.795 min)

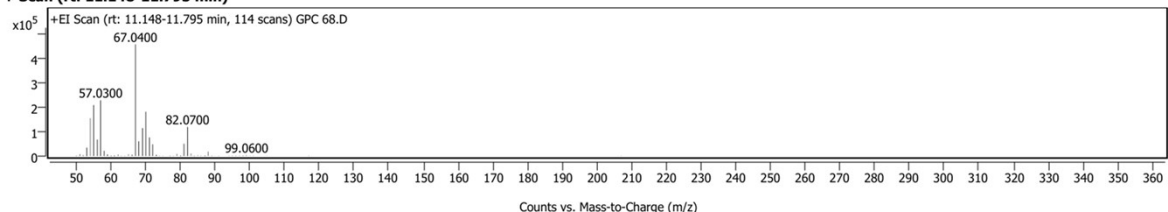

**Figure S42.** GC-MS data of the reaction mixture resulting from the reaction corresponding to Table S2; Entry 2.

Table S2; Entry 3:

### Sample Chromatograms

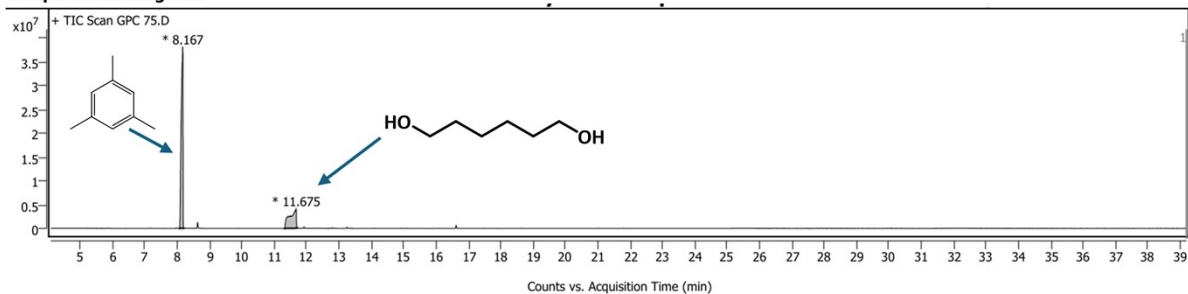

#### Chromatogram Peaks

| Peak | Start  | RT     | End    | Height   | Area      | Area % | SNR |
|------|--------|--------|--------|----------|-----------|--------|-----|
| 1    | 8.047  | 8.167  | 8.236  | 38224800 | 143597503 | 100.00 |     |
| 2    | 11.297 | 11.675 | 11.737 | 4019607  | 56634694  | 39.44  |     |

### Sample Spectra

#### + Scan (rt: 11.177-11.766 min)

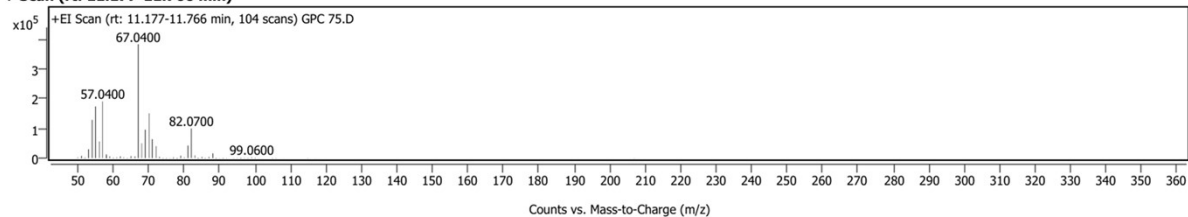

**Figure S43.** GC-MS data of the reaction mixture resulting from the reaction corresponding to Table S2; Entry 3.

Table S2; Entry 4:

### Sample Chromatograms

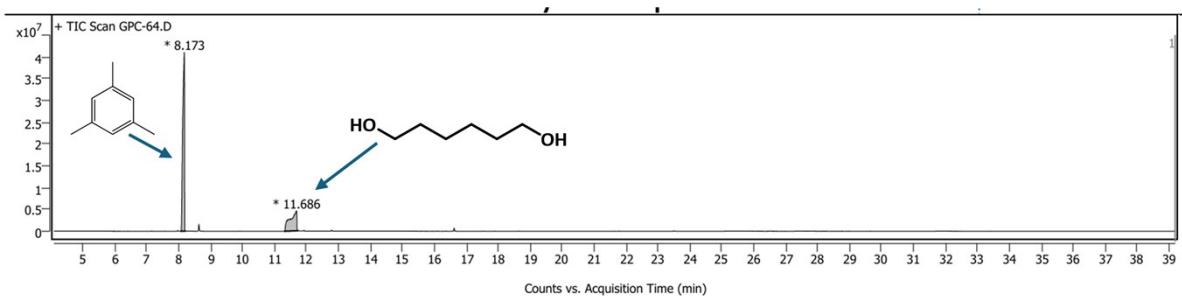

#### Chromatogram Peaks

| Peak | Start  | RT     | End    | Height   | Area      | Area % | SNR |
|------|--------|--------|--------|----------|-----------|--------|-----|
| 1    | 8.058  | 8.173  | 8.213  | 41020169 | 156609490 | 100.00 |     |
| 2    | 11.303 | 11.686 | 11.743 | 4563893  | 65893795  | 42.08  |     |

### Sample Spectra

#### + Scan (rt: 11.303-11.743 min)

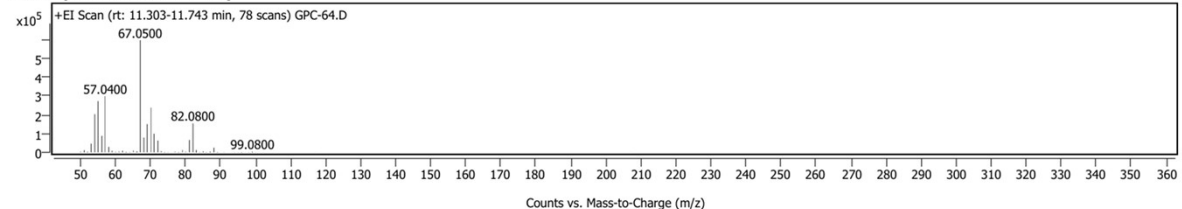

**Figure S44.** GC-MS data of the reaction mixture resulting from the reaction corresponding to Table S2; Entry 4.

Table S2; Entry 5:



### Sample Chromatograms

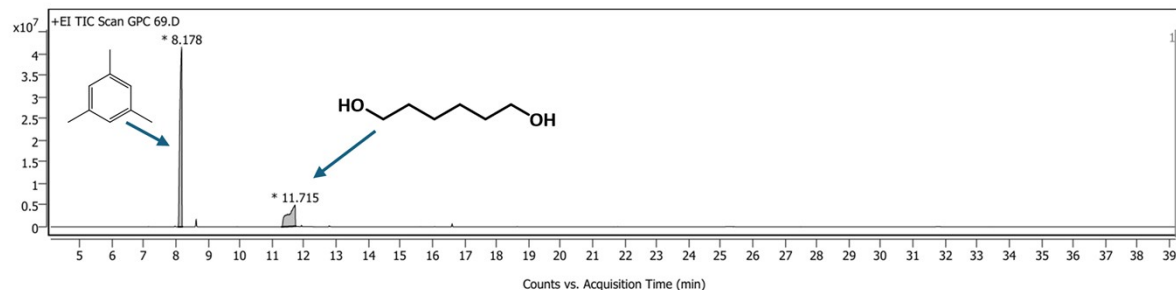

### Sample Spectra

+ Scan (rt: 11.205-11.846 min)

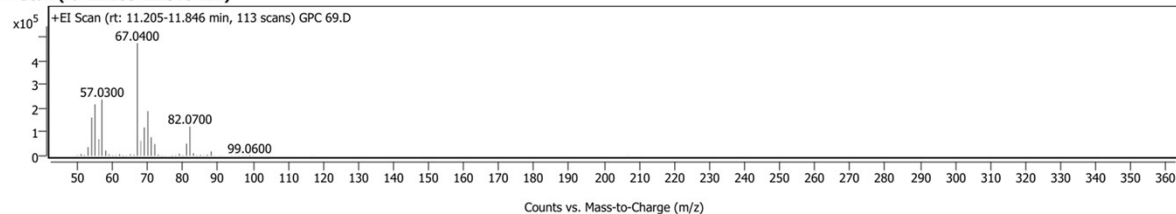

Figure S45. GC-MS data of the reaction mixture resulting from the reaction corresponding to Table S2; Entry 5.

### Table S2; Entry 6

#### Sample Chromatograms

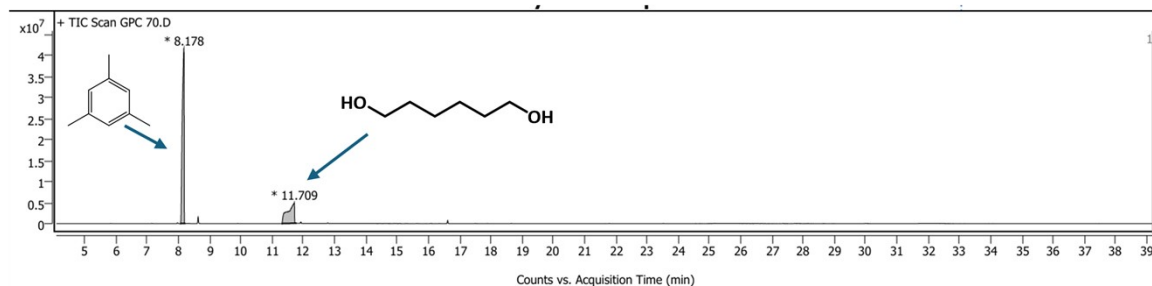

### Sample Spectra

+ Scan (rt: 11.091-11.846 min)

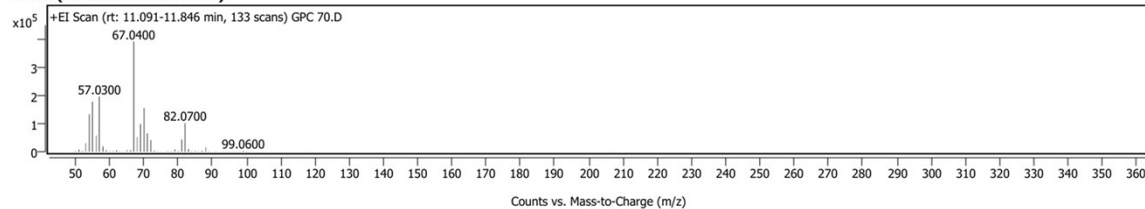

Fi

Figure S46. GC-MS data of the reaction mixture resulting from the reaction corresponding to Table S2; Entry 6.

### Table S2; Entry 7:

### Sample Chromatograms

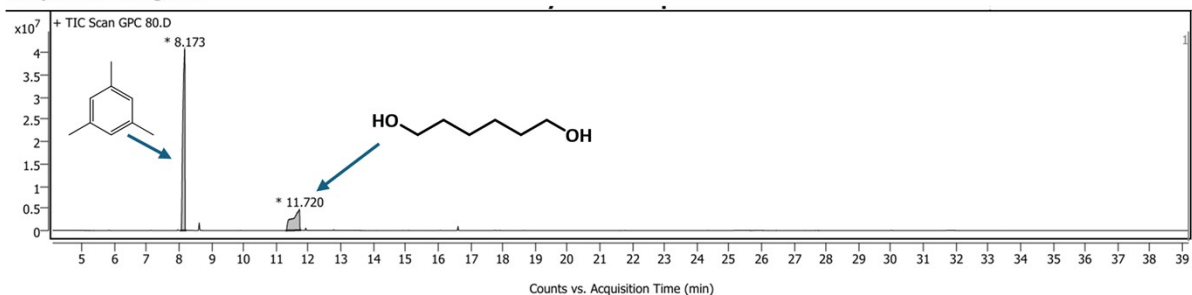

| Chromatogram Peaks |        |        |        |          |           |        |     |
|--------------------|--------|--------|--------|----------|-----------|--------|-----|
| Peak               | Start  | RT     | End    | Height   | Area      | Area % | SNR |
| 1                  | 8.041  | 8.173  | 8.218  | 40771412 | 181388791 | 100.00 |     |
| 2                  | 11.297 | 11.720 | 11.772 | 4620213  | 71810857  | 39.59  |     |

### Sample Spectra

#### + Scan (rt: 11.263-11.846 min)

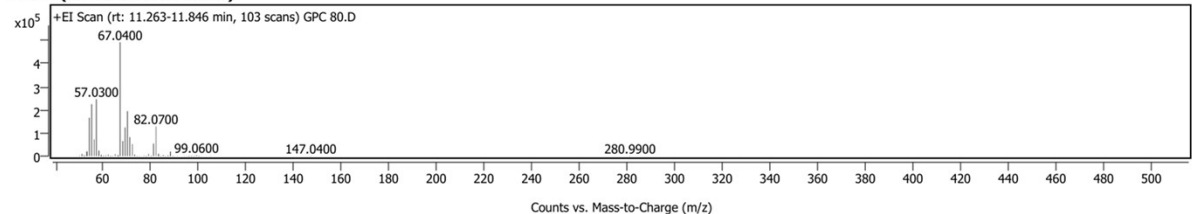

**Figure S47.** GC-MS data of the reaction mixture resulting from the reaction corresponding to Table S2; Entry 7.

### Table S2; Entry 8:

### Sample Chromatograms

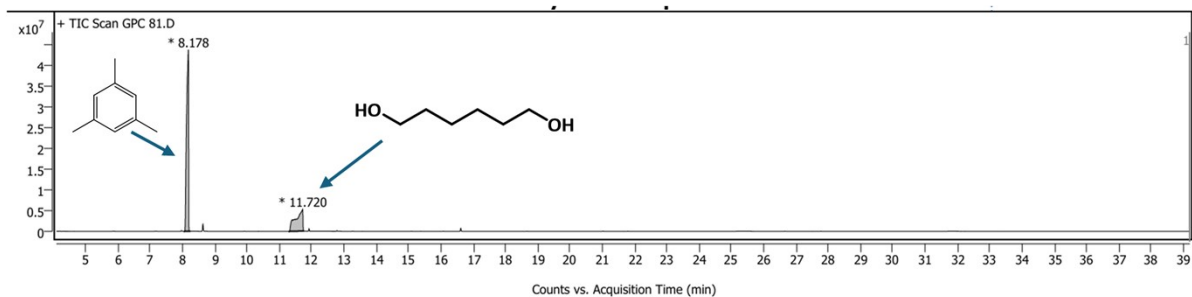

| Chromatogram Peaks |        |        |        |          |           |        |     |
|--------------------|--------|--------|--------|----------|-----------|--------|-----|
| Peak               | Start  | RT     | End    | Height   | Area      | Area % | SNR |
| 1                  | 8.041  | 8.178  | 8.247  | 43678628 | 192404961 | 100.00 |     |
| 2                  | 11.286 | 11.720 | 11.766 | 5178973  | 78720999  | 40.91  |     |

### Sample Spectra

#### + Scan (rt: 11.286-11.789 min)

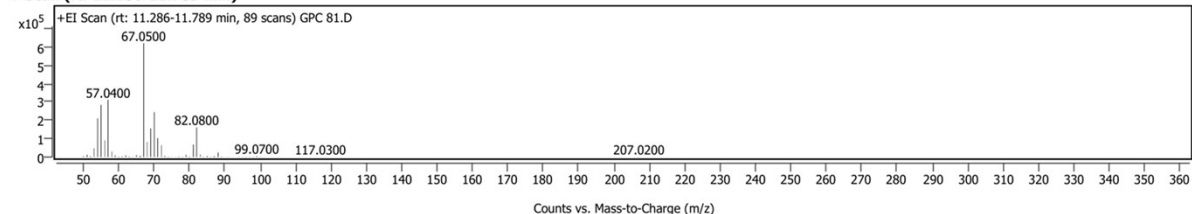

**Figure S48.** GC-MS data of the reaction mixture resulting from the reaction corresponding to Table S2; Entry 8.

## 10. Kinetic studies

**Kinetic analysis of the depolymerisation of Polycaprolactone without precatalyst and Hydrogen pressure:**

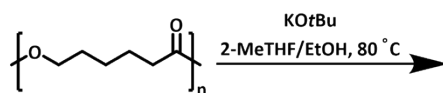

Sample Chromatograms

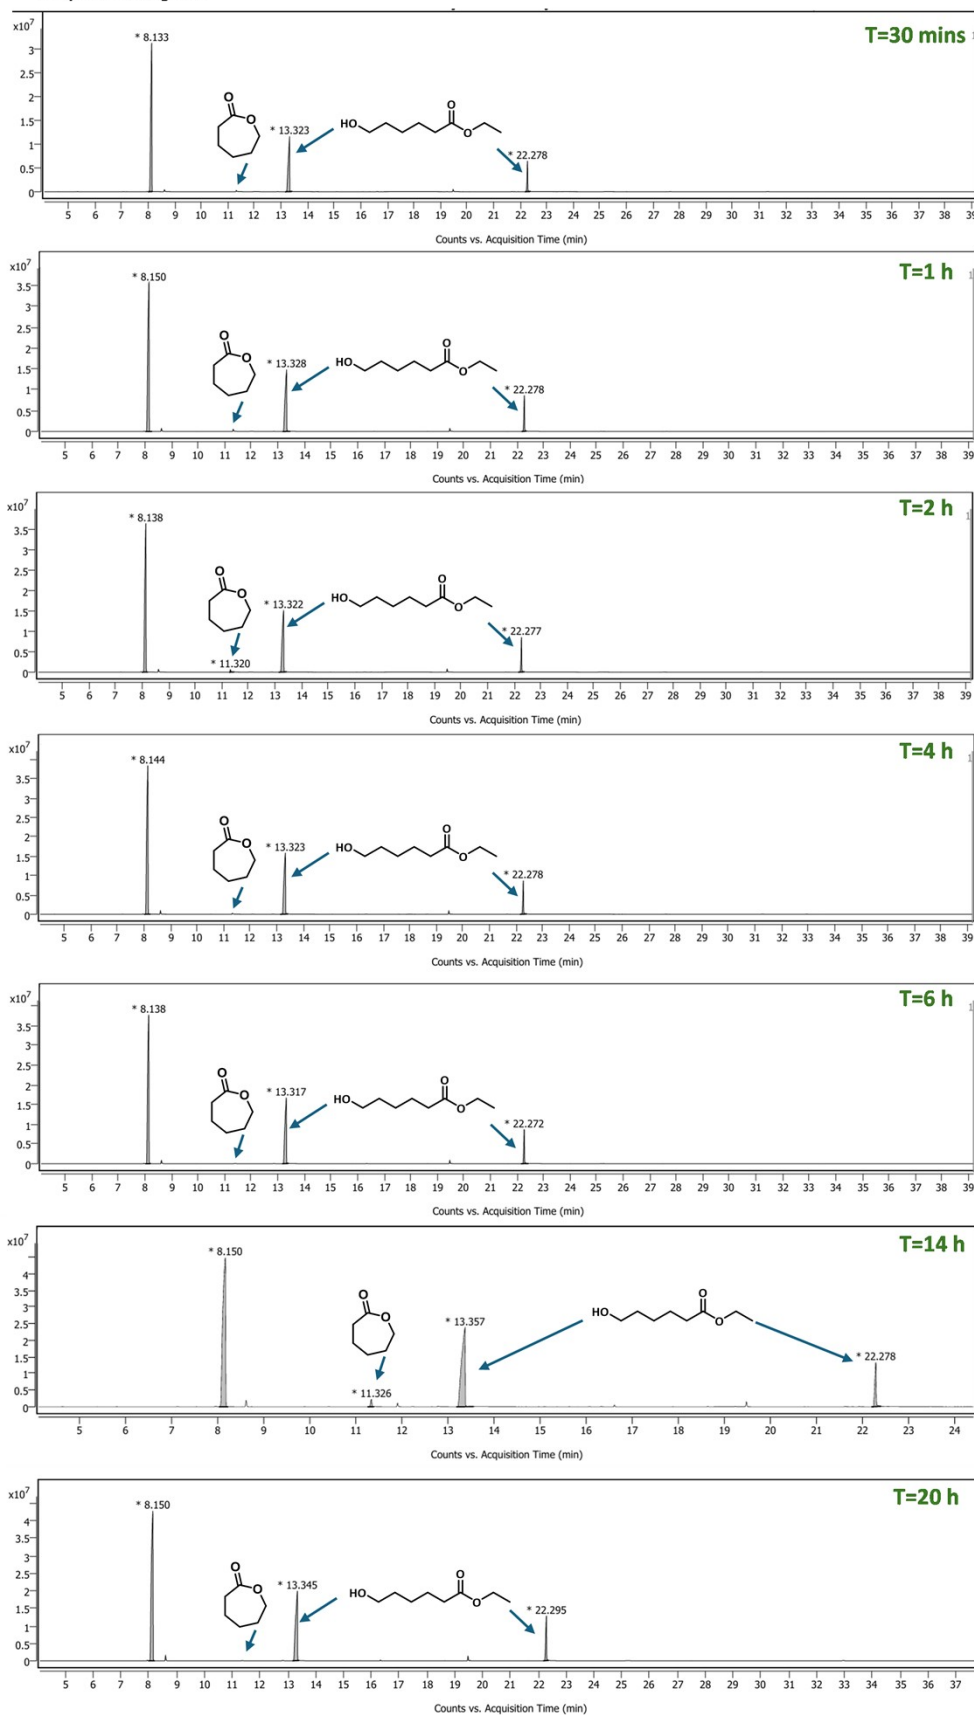

**Figure S49.** GC-MS data of the reaction mixtures at different time intervals.

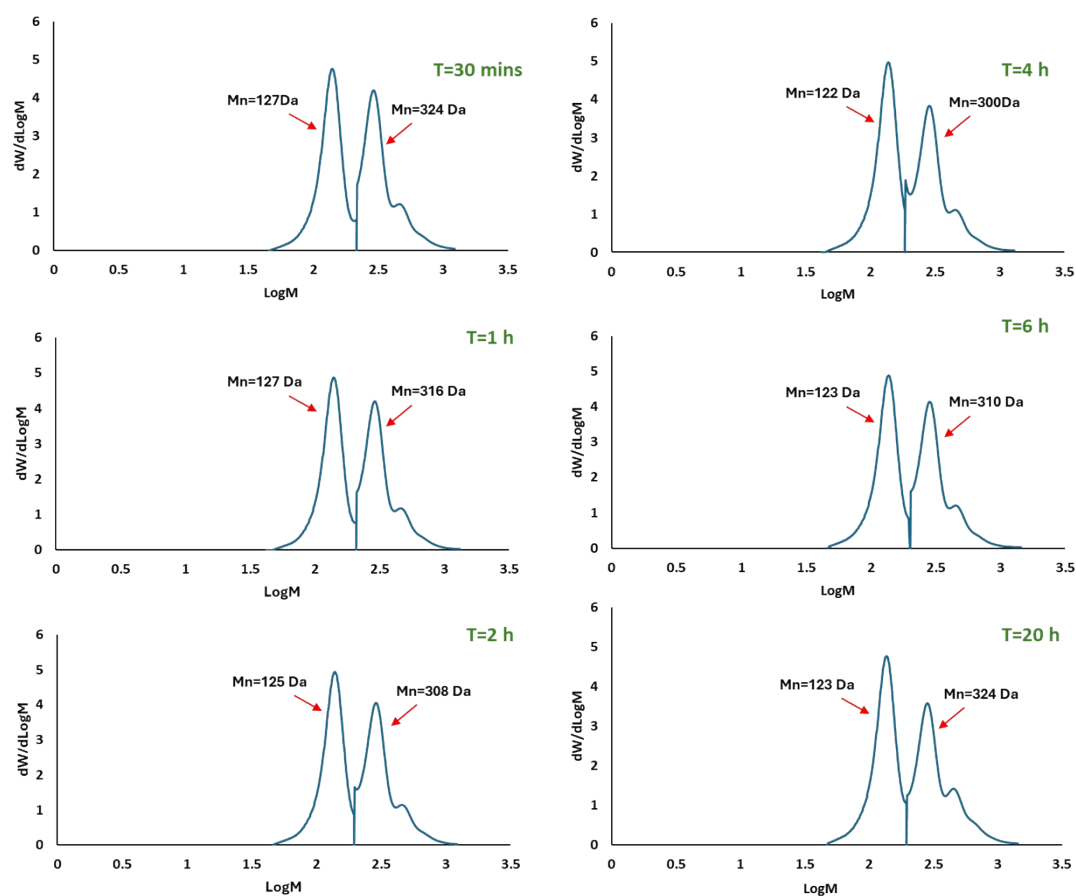

**Figure S50.** GPC data of the reaction mixtures at different time intervals.

***Kinetic analysis of the depolymerisation of Polycaprolactone without Hydrogen pressure:***

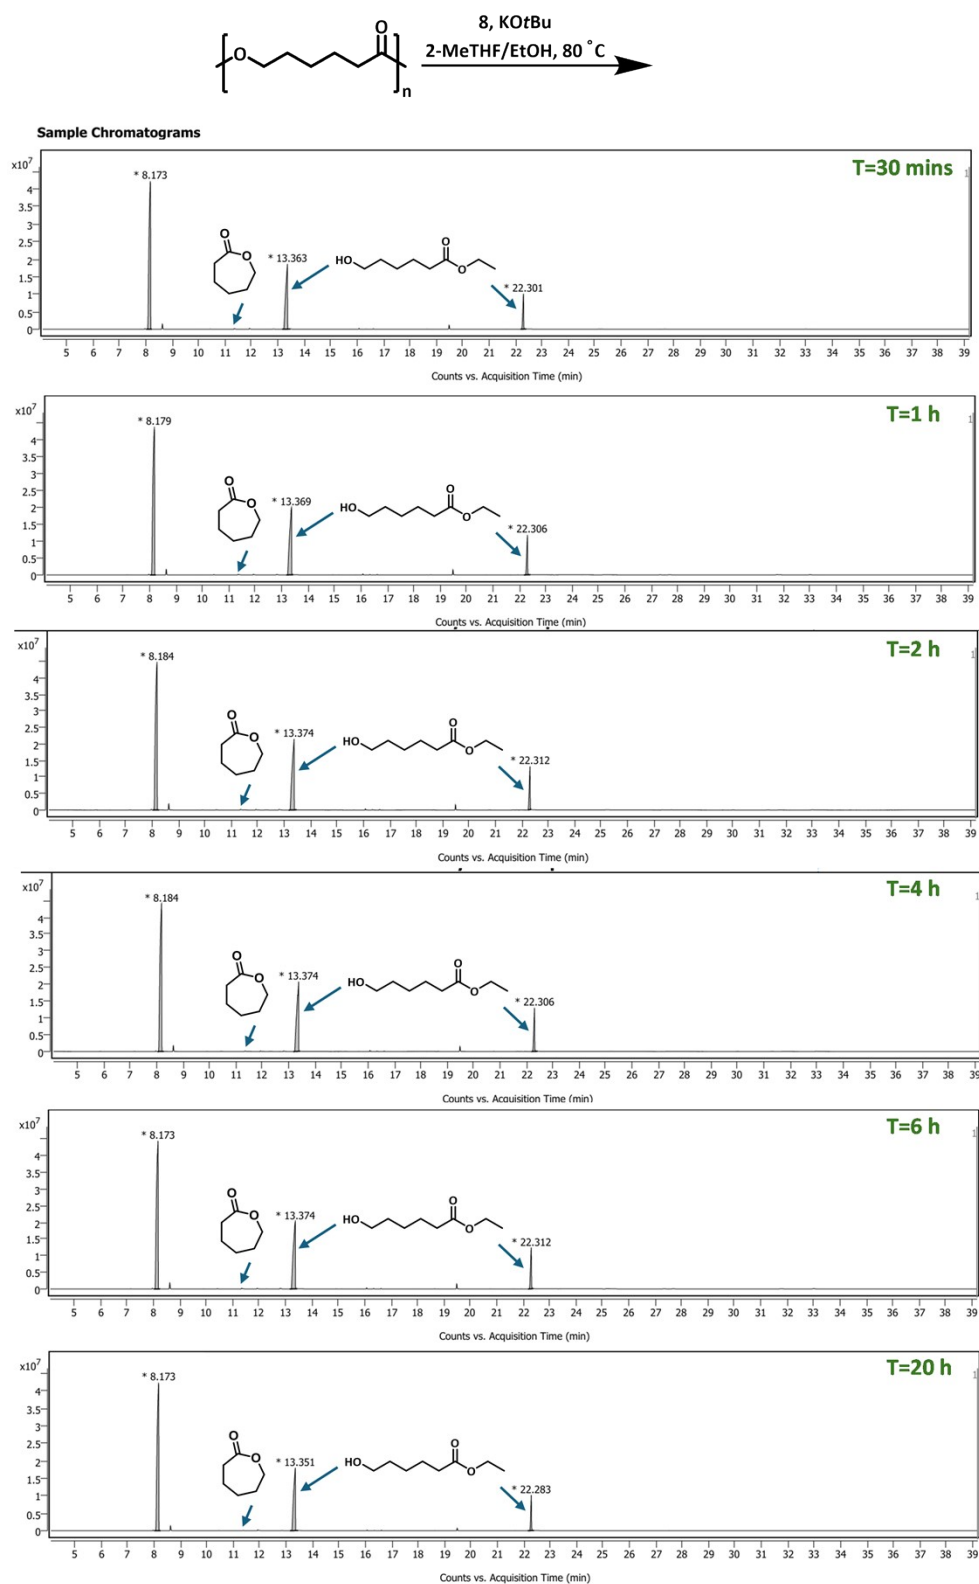

**Figure S51.** GC-MS data of the reaction mixtures at different time intervals.

***Kinetic analysis of the depolymerisation of Polycaprolactone with Hydrogen pressure:***

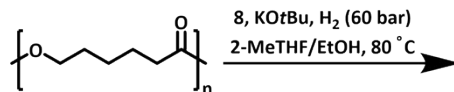

Sample Chromatograms

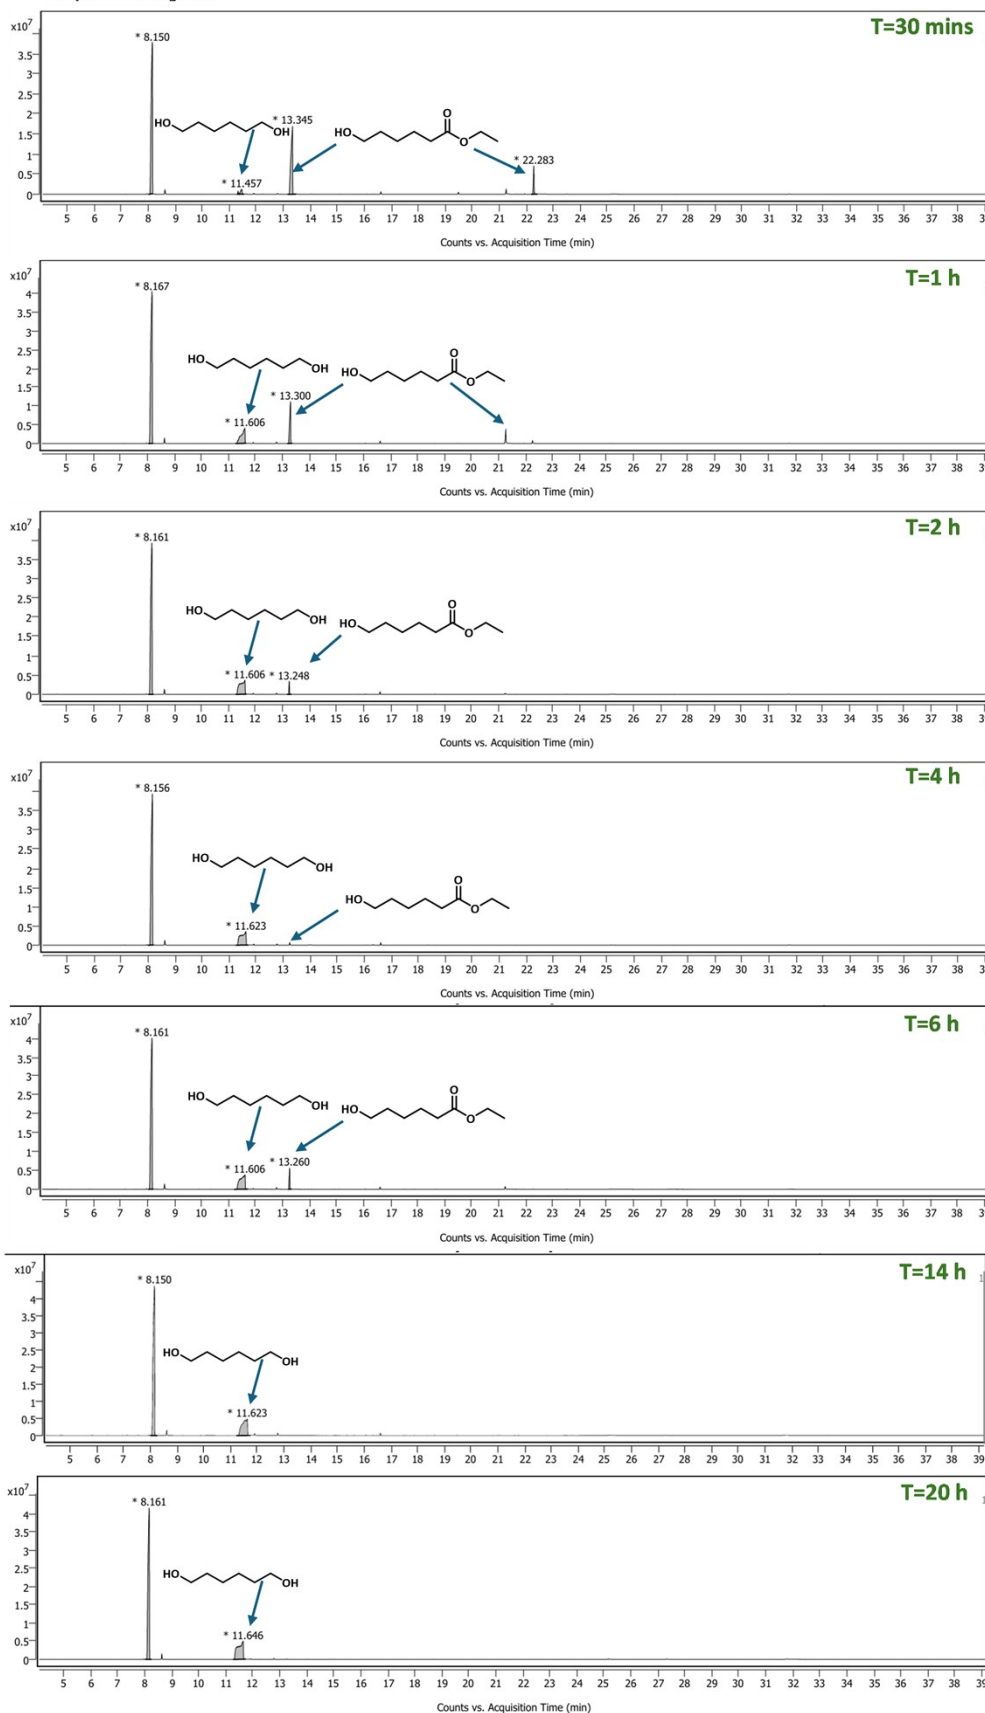

**Figure S52.** GC-MS data of the reaction mixtures at different time intervals.

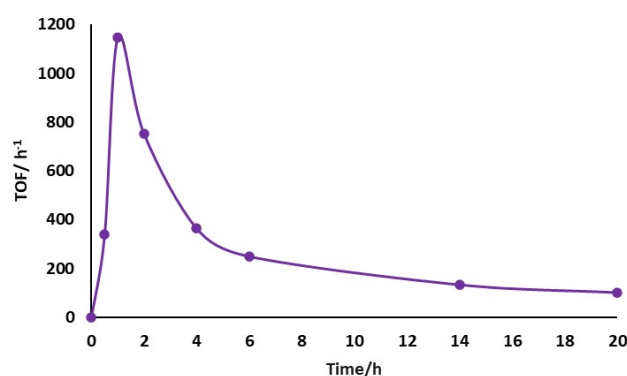

**Figure S53.** Turnover frequency (TOF) data for the hydrogenation reaction at different time intervals.

## 11. Reaction with $\epsilon$ -caprolactone

The hydrogenation reaction with  $\epsilon$ -caprolactone as substrate was conducted instead of PCL using the same reaction conditions as discussed in Table S1, entry 17, and it resulted in full transformation to 1,6-hexanediol confirmed by the GC-MS.

### Sample Chromatograms

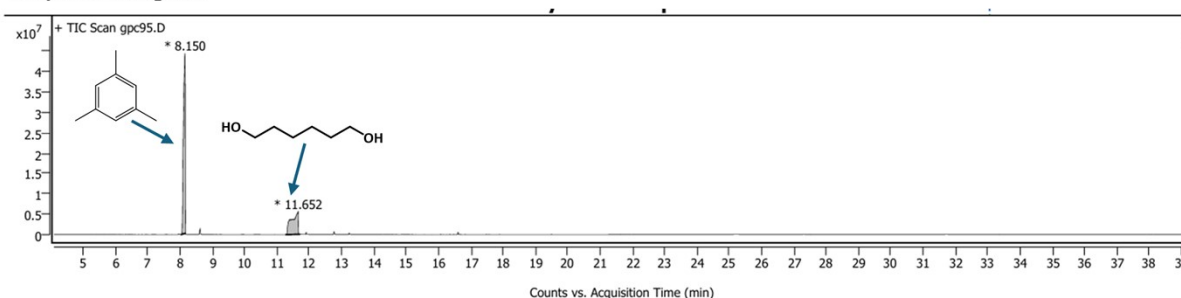

### Chromatogram Peaks

| Peak | Start  | RT     | End    | Height   | Area      | Area % | SNR |
|------|--------|--------|--------|----------|-----------|--------|-----|
| 1    | 8.024  | 8.150  | 8.167  | 44074017 | 164153775 | 100.00 |     |
| 2    | 11.263 | 11.652 | 11.709 | 5581361  | 80048880  | 48.76  |     |

### Sample Spectra

#### + Scan (rt: 11.286-11.709 min)

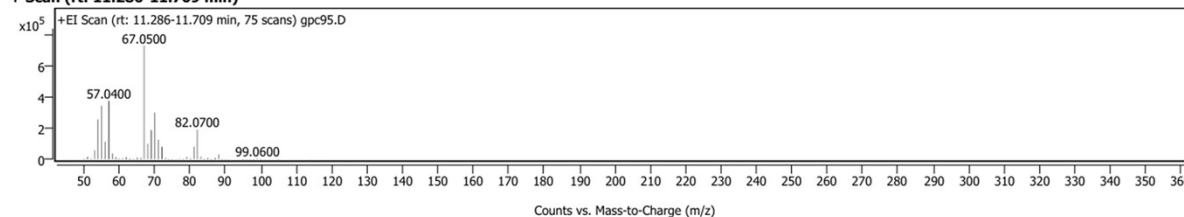

**Figure S54.** GC-MS data of the reaction mixture resulting from the reaction with  $\epsilon$ -caprolactone.

## 12. Role of alcohols in transesterification reactions

The transesterification reactions for different alcohols using the same reaction conditions for 20 h, as described in Fig. 4a in the manuscript were performed. Reaction with methanol resulted in 76% yield of methyl 6-hydroxyhexanoate, and isopropanol resulted in 52% yield of isopropyl 6-hydroxyhexanoate. These suggest that transesterification process can work with multiple alcohols in similar ways.

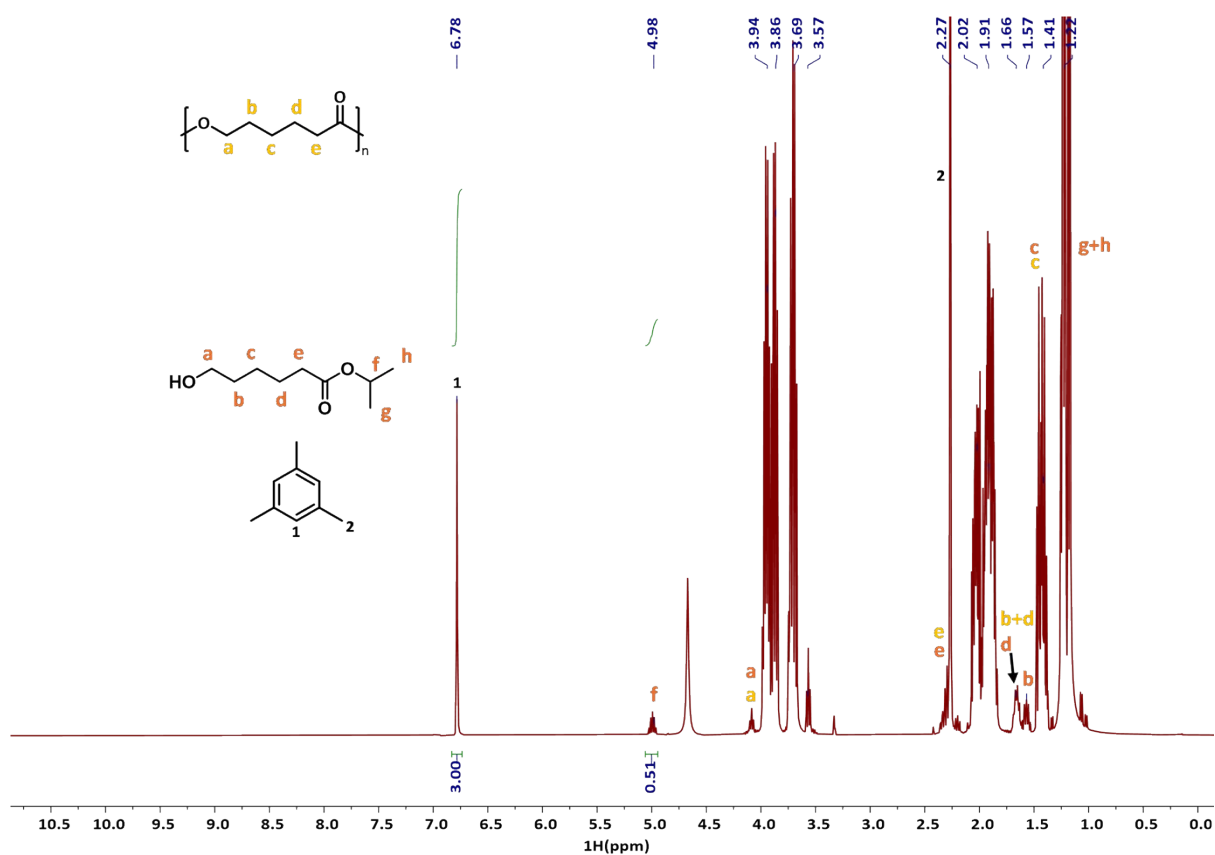

**Figure S55.**  $^1\text{H}$  NMR (400 MHz,  $\text{CD}_3\text{OD}$ ) spectrum of the reaction mixture resulting from the transesterification reaction done by using **isopropanol** as alcohol. Mesitylene is used as an internal standard.



### Sample Chromatograms

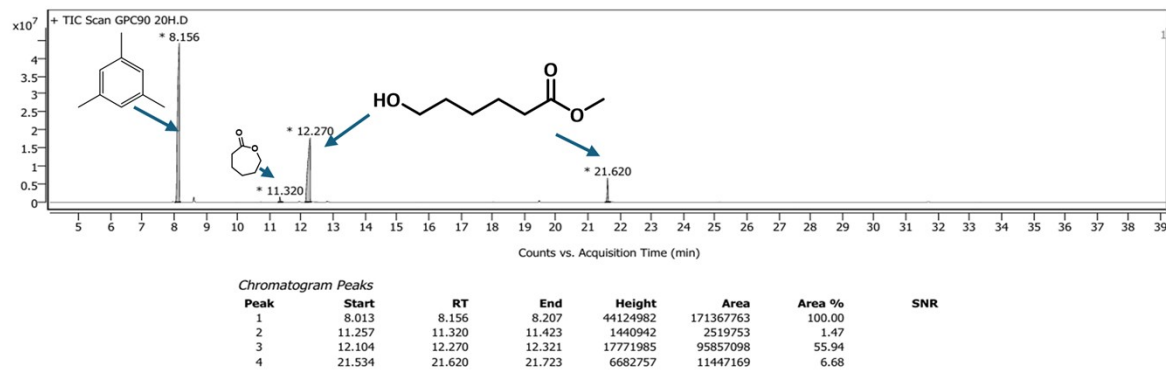

### Sample Spectra

#### + Scan (rt: 11.251-11.412 min)

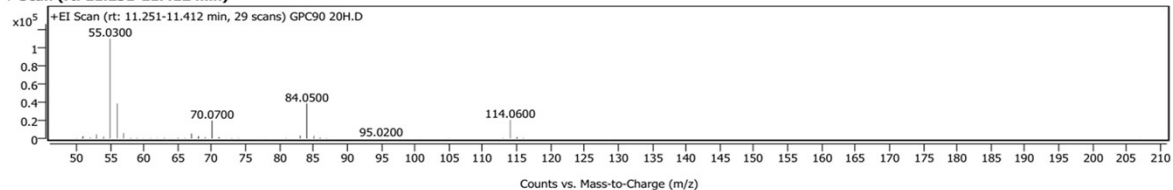

#### + Scan (rt: 12.081-12.327 min)

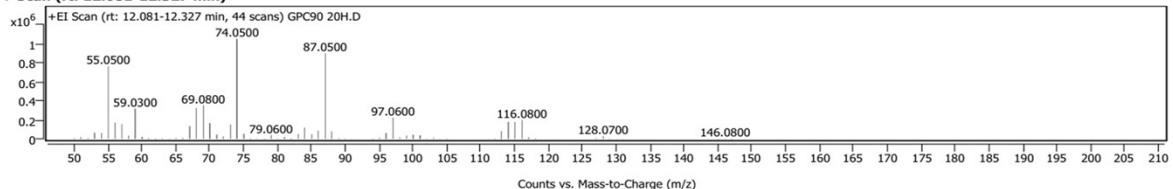

#### + Scan (rt: 21.522-21.711 min)

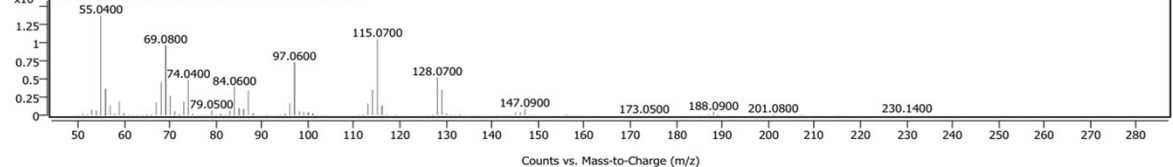

**Figure S56.** GC-MS data of the reaction mixture resulting from the transesterification reaction done by using **methanol** as alcohol. Mesitylene is used as an internal standard.

### 13. Role of temperature in transesterification and hydrogenation reactions

Conducting the transesterification reaction at 60 °C resulted in a 74% yield of E6-HH and a 3% yield of  $\epsilon$ -CPL after 20 h (Figure S56). In contrast, hydrogenation of PCL under identical conditions as entry 17, Table S1(at 60 °C) produced 1,6-hexanediol selectively with 94% yield. Similarly, performing the transesterification reaction at 80 °C for 20 h afforded a 63% yield of E6-HH and a 0.5% yield of  $\epsilon$ -CPL (Figure 4a), while the corresponding hydrogenation yielded >99% 1,6-hexanediol (entry 17, Table S1). These observations indicate that temperature plays a crucial role in the overall process: transesterification proceeds more efficiently at 60 °C, whereas hydrogenation is favoured at 80 °C.

### Sample Chromatograms

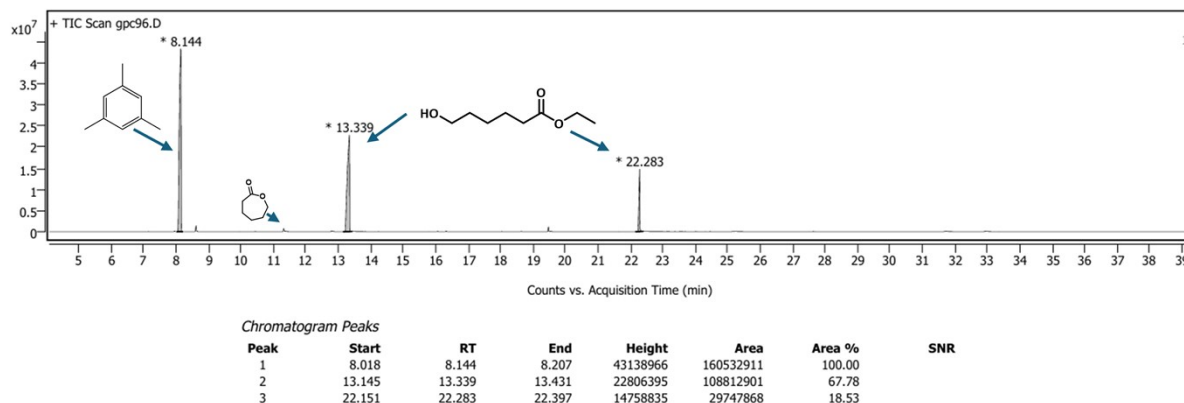

**Figure S57.** GC-MS data of the reaction mixture resulting from the transesterification reaction conducted at 60 °C. Mesitylene is used as an internal standard.

### Sample Chromatograms

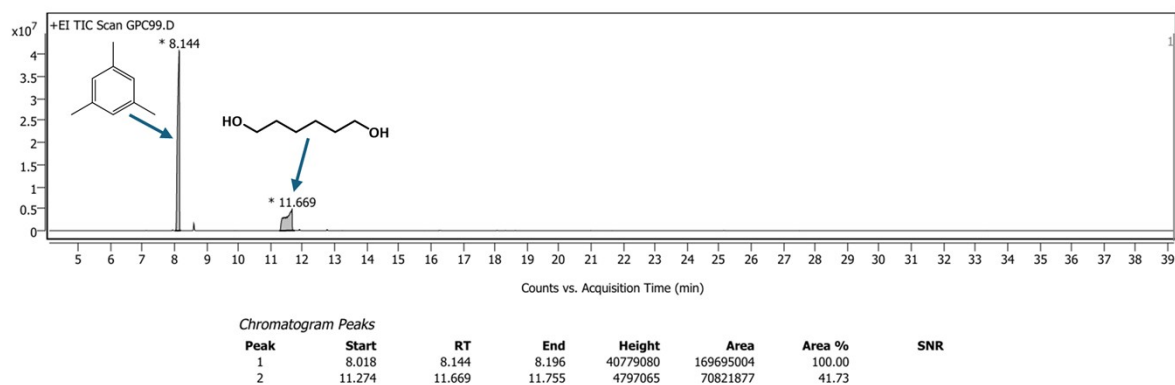

### Sample Spectra

#### + Scan (rt: 11.286-11.709 min)

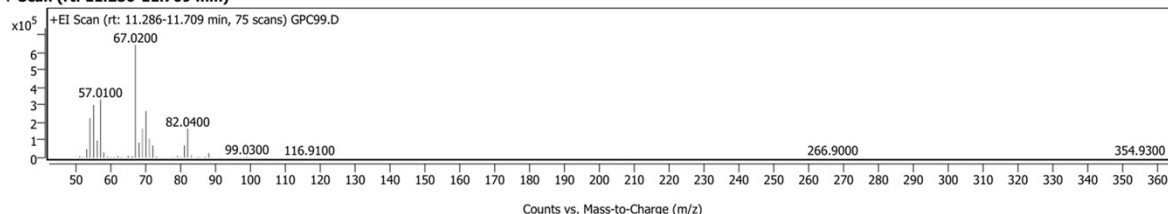

**Figure S57a.** GC-MS data of the reaction mixture resulting from the hydrogenation reaction conducted at 60 °C. Mesitylene is used as an internal standard.

## 14. Catalyst stability

To evaluate the catalyst stability, the reaction was first conducted for 72 h under the conditions described in entry 6, Table S2. Upon completion, 1 mmol of PCL was added to the reaction mixture, followed by recharging with H<sub>2</sub> gas, and the reaction was continued for an additional 72 h. However, no improvement in the product yield was observed, as confirmed by the NMR spectrum. The process predominantly resulted in depolymerization of the polymer into oligomers or E6-HH through a base-mediated transesterification pathway, indicating that the catalyst becomes deactivated after the first cycle.

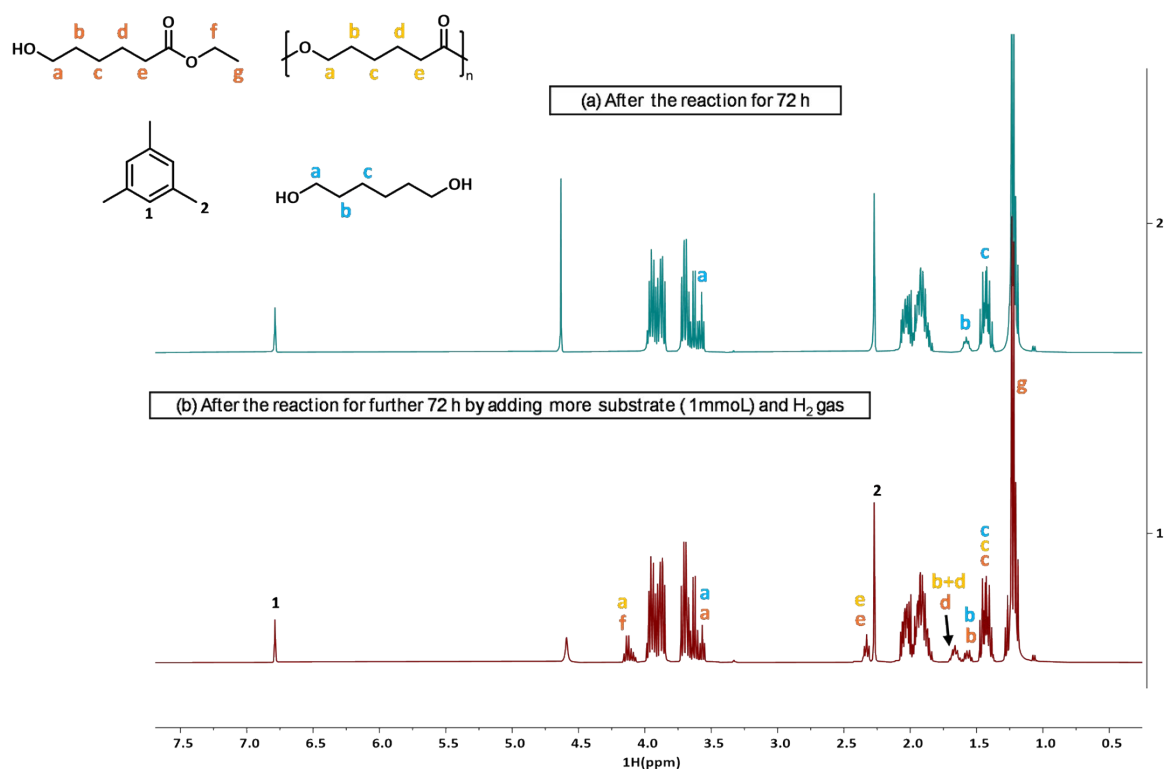

**Figure S58.**  $^1\text{H}$  NMR (400 MHz,  $\text{CD}_3\text{OD}$ ) spectrum of the reaction mixture resulting from the reaction corresponding to Table S2; Entry 6. Mesitylene is used as an internal standard.

#### Sample Chromatograms

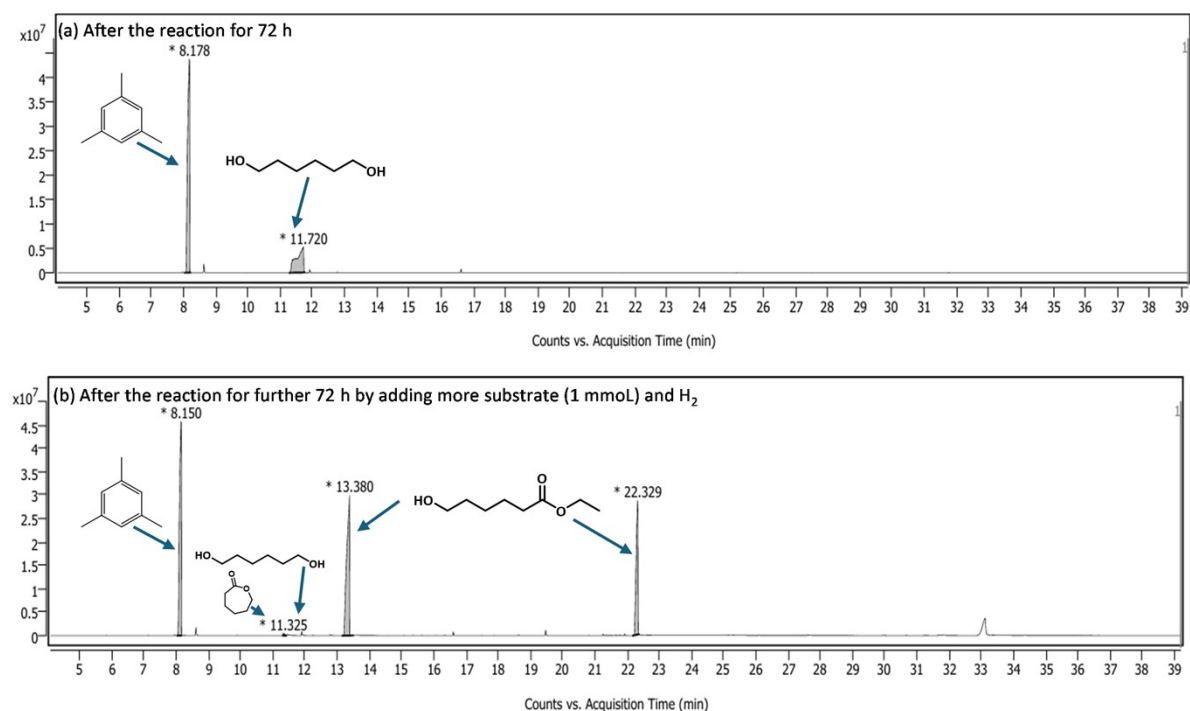

**Figure S59.** GC-MS data of the reaction mixture resulting from the reaction corresponding to Table S2; Entry 6. Mesitylene is used as an internal standard.

#### 15. DFT Studies

The computational study was carried out using a two-step approach. Initially, geometry optimizations and frequency calculations were performed using the functional B3LYP<sup>3</sup> and the 6-21G basis set<sup>4</sup> to

obtain reliable starting structures. The optimized geometries and frequencies were then re-optimized at the higher B3LYP/6-311G+(d,p)<sup>5</sup> level of theory. Frequency calculations at this level of theory confirmed stationary points and transition states and were used to compute thermodynamic properties at 353.15 K, tetrahydrofuran (THF) as the reaction medium (using PCM as solvent model)<sup>6</sup> and 59.2 atm to match the experimental conditions. Gibbs Free Energies, unless otherwise stated, were computed by adding the Free Energy correction terms from the frequency calculations to the single point energies at the B3LYP/6-311G+(d,p) level of theory in solution (THF).

Gibbs free energies were computed by adding the free energy correction term from the frequency calculation to the single point energy in dioxane, according to

$$G_{\text{B3LYP/6-311G}^*(\text{d,p})}^{\text{(THF, 353.15K)}} = E_{\text{B3LYP/6-311G}^*(\text{d,p})}^{\text{THF}} + \text{corr}_{\text{B3LYP/6-311G}^*(\text{d,p})}^{\text{freq(THF, 59.2 atm, 353.15K)}}$$

Optimizations, frequency calculations and single point energies were done using the Gaussian 16 software suite in the C.01 revision.

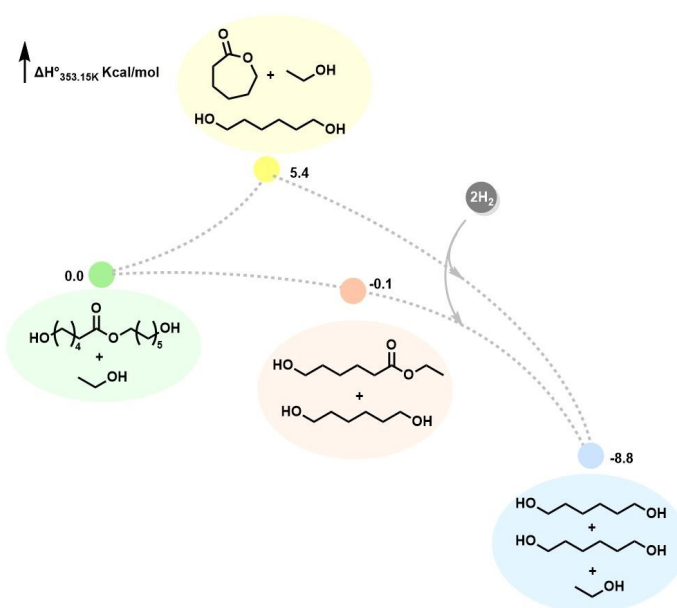

**Figure S60.** Enthalpy surface for the depolymerisation of caprolactone dimer to form 1,6-HD. Enthalpies were calculated at 353.15 K, 60 bar and at 1 M concentration of solutes in Kcal/mol.

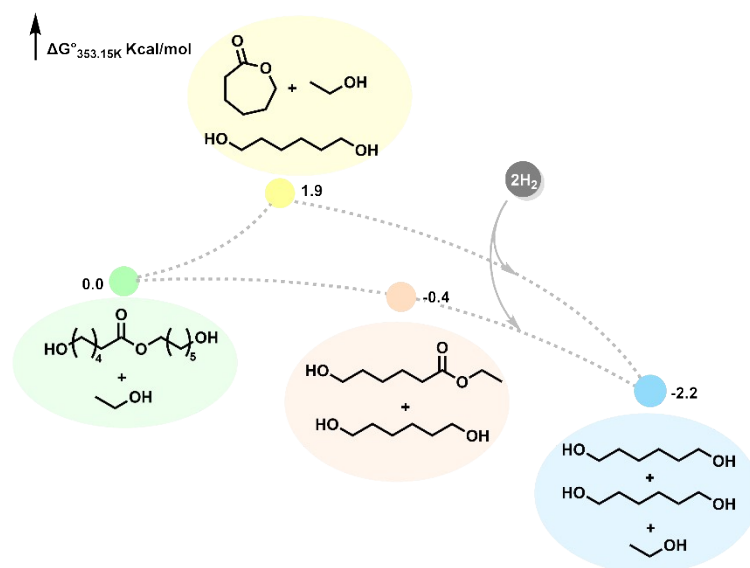

**Figure S61.** Energy surface for the depolymerisation of caprolactone dimer to form 1,6-HD. Free energies were calculated at 353.15 K, 60 bar and at 1 M concentration of solutes in Kcal/mol.

## CARTESIAN COORDINATES

### $\epsilon$ -Caprolactone

|   |          |          |          |
|---|----------|----------|----------|
| O | 0.78044  | -1.23389 | -0.07345 |
| O | 2.50287  | 0.08419  | -0.41033 |
| C | -1.86520 | 0.67934  | -0.03983 |
| C | -0.62957 | 1.56425  | -0.23517 |
| C | -1.65614 | -0.80020 | -0.38100 |
| C | 0.59781  | 1.13832  | 0.60122  |
| C | -0.56229 | -1.49130 | 0.42411  |
| C | 1.37102  | -0.02372 | 0.01131  |
| H | -2.19427 | 0.75759  | 1.00398  |
| H | -2.68367 | 1.07310  | -0.65033 |
| H | -0.88282 | 2.58866  | 0.05103  |
| H | -0.35132 | 1.60090  | -1.29430 |
| H | -2.58776 | -1.34369 | -0.19088 |
| H | -1.43531 | -0.92714 | -1.44682 |
| H | 0.28474  | 0.89194  | 1.62185  |
| H | 1.30848  | 1.96123  | 0.66911  |
| H | -0.60918 | -1.23192 | 1.48565  |
| H | -0.64916 | -2.57318 | 0.33714  |

|                                         |   |                           |
|-----------------------------------------|---|---------------------------|
| Zero-point correction                   | = | 0.155869 Hartree/Particle |
| Thermal correction to Energy            | = | 0.165754                  |
| Thermal correction to Enthalpy          | = | 0.166872                  |
| Thermal correction to Gibbs Free Energy | = | 0.121449                  |

Sum of electronic and zero-point Energies = -385.082609  
 Sum of electronic and thermal Energies = -385.072724  
 Sum of electronic and thermal Enthalpies = -385.071606  
 Sum of electronic and thermal Free Energies = -385.117028

Caprolactone Dimer

|   |          |          |          |
|---|----------|----------|----------|
| C | -2.33804 | -0.30459 | -0.19039 |
| H | -2.29939 | -0.78723 | -1.17798 |
| H | -2.19214 | -1.10975 | 0.54179  |
| C | -3.69312 | 0.38525  | 0.01825  |
| H | -3.81174 | 1.19096  | -0.71766 |
| H | -3.71205 | 0.86211  | 1.00749  |
| C | -4.86911 | -0.60124 | -0.10049 |
| H | -4.73855 | -1.41363 | 0.63056  |
| H | -4.85185 | -1.07002 | -1.09620 |
| C | -6.23343 | 0.07753  | 0.12524  |
| H | -6.37226 | 0.88646  | -0.60499 |
| H | -6.25868 | 0.53739  | 1.12263  |
| C | -7.39545 | -0.89912 | 0.00514  |
| H | -7.30597 | -1.70501 | 0.74580  |
| H | -7.42848 | -1.34532 | -0.99776 |
| O | -8.63960 | -0.14642 | 0.24807  |
| H | -9.42150 | -0.72949 | 0.17870  |
| O | 0.03113  | -0.05197 | -0.14218 |
| C | 1.29805  | 0.73008  | -0.07500 |
| H | 1.32300  | 1.40571  | -0.93565 |
| H | 1.27880  | 1.32593  | 0.84247  |
| C | 2.44371  | -0.27025 | -0.09078 |
| H | 2.33542  | -0.95459 | 0.76120  |
| H | 2.38103  | -0.87738 | -1.00361 |
| C | 3.81523  | 0.43056  | -0.02377 |
| H | 3.92224  | 1.11371  | -0.87951 |
| H | 3.86628  | 1.05228  | 0.88259  |
| C | 4.99069  | -0.56454 | -0.01955 |
| H | 4.87916  | -1.25027 | 0.83396  |
| H | 4.94376  | -1.18384 | -0.92802 |
| C | 6.36095  | 0.13515  | 0.05818  |
| H | 6.48323  | 0.81025  | -0.79992 |
| H | 6.41025  | 0.75459  | 0.96417  |
| C | 7.51989  | -0.85225 | 0.07656  |
| H | 7.53174  | -1.45836 | -0.83909 |
| H | 7.44630  | -1.52414 | 0.94211  |
| O | 8.76900  | -0.07373 | 0.16576  |
| H | 9.54934  | -0.66289 | 0.17899  |

O -1.21151 1.86674 0.00602  
C -1.15772 0.62935 -0.09564

Zero-point correction = 0.353879 Hartree/Particle  
Thermal correction to Energy = 0.381274  
Thermal correction to Enthalpy = 0.382392  
Thermal correction to Gibbs Free Energy = 0.285372

Sum of electronic and zero-point Energies = -772.534653  
Sum of electronic and thermal Energies = -772.507257  
Sum of electronic and thermal Enthalpies = -772.506139  
Sum of electronic and thermal Free Energies = -772.603159

#### Ethanol

O -1.16167 -0.39642 0.00003  
H -1.99194 0.09087 0.00015  
C -0.07875 0.54789 -0.00002  
H -0.14157 1.19009 -0.88696  
H -0.14154 1.19016 0.88687  
C 1.22707 -0.22326 -0.00002  
H 1.30227 -0.85782 -0.88687  
H 2.07392 0.46800 -0.00008  
H 1.30232 -0.85772 0.88691

Zero-point correction = 0.079410 Hartree/Particle  
Thermal correction to Energy = 0.085068  
Thermal correction to Enthalpy = 0.086186  
Thermal correction to Gibbs Free Energy = 0.052690

Sum of electronic and zero-point Energies = -155.020221  
Sum of electronic and thermal Energies = -155.014563  
Sum of electronic and thermal Enthalpies = -155.013445  
Sum of electronic and thermal Free Energies = -155.046941

#### 1,6 Hexanediol

C -1.92755 0.37825 0.00000  
H -1.95681 1.03069 -0.88022  
H -1.95680 1.03068 0.88023  
C -0.62965 -0.43720 0.00000  
H -0.61084 -1.09500 -0.87789  
H -0.61084 -1.09500 0.87788

C 0.62965 0.43720 0.00000  
 H 0.61084 1.09500 0.87789  
 H 0.61084 1.09500 -0.87788  
 C 1.92755 -0.37825 0.00000  
 H 1.95680 -1.03068 -0.88023  
 H 1.95681 -1.03069 0.88022  
 C 3.17120 0.49641 0.00000  
 H 3.17929 1.14227 0.88746  
 H 3.17929 1.14227 -0.88746  
 C -3.17120 -0.49641 0.00000  
 H -3.17929 -1.14227 0.88746  
 H -3.17929 -1.14227 -0.88746  
 O 4.32752 -0.35539 -0.00001  
 H 5.11529 0.19822 0.00000  
 O -4.32752 0.35539 0.00000  
 H -5.11529 -0.19822 0.00001

Zero-point correction = 0.197890 Hartree/Particle

Thermal correction to Energy = 0.212206

Thermal correction to Enthalpy = 0.213324

Thermal correction to Gibbs Free Energy = 0.156206

Sum of electronic and zero-point Energies = -387.441300

Sum of electronic and thermal Energies = -387.426984

Sum of electronic and thermal Enthalpies = -387.425866

Sum of electronic and thermal Free Energies = -387.482984

#### Ethyl 6-hydroxyhexanoate

C 4.53364 -0.61149 -0.00007  
 H 4.55325 -1.25166 0.89203  
 H 4.55331 -1.25134 -0.89239  
 C 3.29850 0.27929 0.00004  
 H 3.33154 0.93163 0.88332  
 H 3.33156 0.93188 -0.88306  
 C 1.98911 -0.53207 -0.00008  
 H 1.96511 -1.18990 -0.88222  
 H 1.96510 -1.19014 0.88190  
 C 0.73785 0.36530 0.00003  
 H 0.75601 1.02231 -0.87953  
 H 0.75608 1.02218 0.87969  
 C -0.55804 -0.45675 0.00002  
 H -0.59707 -1.11890 -0.87619  
 H -0.59712 -1.11886 0.87627  
 C -1.81447 0.37767 -0.00003



O 5.71853 0.26584 0.00015  
 H 6.54362 -0.25888 -0.00024  
 O -1.86858 1.61930 0.00004  
 O -2.93926 -0.40574 -0.00018  
 C -4.27212 0.26659 -0.00016  
 H -4.32687 0.90004 0.88947  
 H -4.32709 0.89958 -0.89011  
 C -5.31826 -0.83102 0.00024  
 H -5.22572 -1.46249 0.88972  
 H -6.31860 -0.38275 0.00018  
 H -5.22585 -1.46300 -0.88890

Zero-point correction = 0.235610 Hartree/Particle  
 Thermal correction to Energy = 0.254105  
 Thermal correction to Enthalpy = 0.255223  
 Thermal correction to Gibbs Free Energy= 0.181343

Sum of electronic and zero-point Energies = -540.113454  
 Sum of electronic and thermal Energies = -540.094959  
 Sum of electronic and thermal Enthalpies = -540.093842  
 Sum of electronic and thermal Free Energies = -540.167722

## 16. References

- 1 S. Elangovan, C. Topf, S. Fischer, H. Jiao, A. Spannenberg, W. Baumann, R. Ludwig, K. Junge and M. Beller, *J Am Chem Soc*, 2016, **138**, 8809–8814.
- 2 C. Alberti and S. Enthaler, *ChemistrySelect*, 2021, **6**, 11244–11248.
- 3 A. D. Becke, *J Chem Phys*, 1993, **98**, 5648–5652.
- 4 J. S. Binkley, J. A. Pople and W. J. Hehre, *J Am Chem Soc*, 1980, **102**, 939–947.
- 5 R. Krishnan, J. S. Binkley, R. Seeger and J. A. Pople, *J Chem Phys*, 1980, **72**, 650–654.
- 6 J. Tomasi, B. Mennucci and R. Cammi, *Chem Rev*, 2005, **105**, 2999–3093.
